# Supplementary material for: Dibenzo[d,d′]benzo[2,1-b:3,4-b′]difurans with extended π-conjugated chains: synthetic approaches and properties
Source: Royal Society of Chemistry journal article supplement (doi:10.1039/d1nj04796e), 2021-12-15
Supplement: d1nj04796e1.pdf [file d1nj04796e1.pdf]

## **Dibenzo[*d,d'*]benzo[2,1-*b*:3,4-*b'*]difurans with extended $\pi$ -conjugated chains: the synthetic approach and some properties**

**Masafumi Hirano,\* Harumi Okada, Chikara Hayasaka, Nobuyuki Komine, Sayori Kiyota and Koji Nakano**

Department of Applied Chemistry, Graduate School of Engineering, Tokyo University of Agriculture and Technology, 2-24-16  
Nakacho, Koganei, Tokyo, 184-8588, Japan

[hrc@cc.tuat.ac.jp](mailto:hrc@cc.tuat.ac.jp) (MH)

## Table of Contents

|                                                                                                                                                                                                                                        |    |
|----------------------------------------------------------------------------------------------------------------------------------------------------------------------------------------------------------------------------------------|----|
| <b>Figure S1.</b> $^1\text{H}$ NMR Spectrum of 2-(2,4-dimethoxyphenyl)-4,4,5,5-tetramethyl-1,3,2-dioxaborolane ( <b>3</b> )                                                                                                            | 6  |
| <b>Figure S2.</b> $^1\text{H}$ NMR Spectrum of 2,3-difluoro-1,4-bis(2,4-dimethoxyphenyl)benzene ( <b>4</b> )                                                                                                                           | 7  |
| <b>Figure S3.</b> $^{13}\text{C}\{^1\text{H}\}$ NMR Spectrum of 2,3-difluoro-1,4-bis(2,4-dimethoxyphenyl)benzene ( <b>4</b> )                                                                                                          | 8  |
| <b>Figure S4.</b> $^{19}\text{F}$ NMR Spectrum of 2,3-difluoro-1,4-bis(2,4-dimethoxyphenyl)benzene ( <b>4</b> )                                                                                                                        | 9  |
| <b>Figure S5.</b> $^1\text{H}$ NMR Spectrum of 2,3-difluoro-1,4-bis(2,4-dihydroxyphenyl)benzene ( <b>5</b> )                                                                                                                           | 10 |
| <b>Figure S6.</b> $^{13}\text{C}\{^1\text{H}\}$ NMR Spectrum of 2,3-difluoro-1,4-bis(2,4-dihydroxyphenyl)benzene ( <b>5</b> )                                                                                                          | 11 |
| <b>Figure S7.</b> $^{19}\text{F}$ NMR Spectrum of 2,3-difluoro-1,4-bis(2,4-dihydroxyphenyl)benzene ( <b>5</b> )                                                                                                                        | 12 |
| <b>Figure S8.</b> $^1\text{H}$ NMR Spectrum of dibenzo[ <i>d,d'</i> ]benzo[2,1- <i>b:3,4-b'</i> ]difuran-3,8-diol ( <b>6</b> )                                                                                                         | 13 |
| <b>Figure S9.</b> $^{13}\text{C}\{^1\text{H}\}$ NMR Spectrum of dibenzo[ <i>d,d'</i> ]benzo[2,1- <i>b:3,4-b'</i> ]difuran-3,8-diol ( <b>6</b> )                                                                                        | 14 |
| <b>Figure S10.</b> $^1\text{H}$ NMR Spectrum of dibenzo[ <i>d,d'</i> ]benzo[2,1- <i>b:3,4-b'</i> ]difuran-3,8-diyltrifluoromethanesulfonate ( <b>7</b> )                                                                               | 15 |
| <b>Figure S11.</b> $^{13}\text{C}\{^1\text{H}\}$ NMR Spectrum of dibenzo[ <i>d,d'</i> ]benzo[2,1- <i>b:3,4-b'</i> ]difuran-3,8-diyltrifluoromethanesulfonate ( <b>7</b> )                                                              | 16 |
| <b>Figure S12.</b> $^{19}\text{F}$ NMR Spectrum of dibenzo[ <i>d,d'</i> ]benzo[2,1- <i>b:3,4-b'</i> ]difuran-3,8-diyltrifluoromethanesulfonate ( <b>7</b> )                                                                            | 17 |
| <b>Figure S13.</b> $^1\text{H}$ NMR Spectrum of 3,8-di(hex-1-yn-1-yl)dibenzo[ <i>d,d'</i> ]benzo[2,1- <i>b:3,4-b'</i> ]difuran ( <b>8a</b> )                                                                                           | 18 |
| <b>Figure S14.</b> $^{13}\text{C}\{^1\text{H}\}$ NMR Spectrum of 3,8-di(hex-1-yn-1-yl)dibenzo[ <i>d,d'</i> ]benzo[2,1- <i>b:3,4-b'</i> ]difuran ( <b>8a</b> )                                                                          | 19 |
| <b>Figure S15.</b> $^1\text{H}$ NMR Spectrum of 3,8-bis(trimethylsilylethynyl)dibenzo[ <i>d,d'</i> ]benzo[2,1- <i>b:3,4-b'</i> ]difuran ( <b>8b</b> )                                                                                  | 20 |
| <b>Figure S16.</b> $^{13}\text{C}\{^1\text{H}\}$ NMR Spectrum of 3,8-bis(trimethylsilylethynyl)dibenzo[ <i>d,d'</i> ]benzo[2,1- <i>b:3,4-b'</i> ]difuran ( <b>8b</b> )                                                                 | 21 |
| <b>Figure S17.</b> $^1\text{H}$ NMR Spectrum of 3,8-bis((1 <i>E</i> ,3 <i>E</i> ,5 <i>E</i> )-2-butyl-6-methoxycarbonylhepta-1,3,5-trien-1-yl)dibenzo[ <i>d,d'</i> ]benzo[2,1- <i>b:3,4-b'</i> ]difuran ( <b>9a</b> )                  | 22 |
| <b>Figure S18.</b> $^{13}\text{C}\{^1\text{H}\}$ NMR Spectrum of 3,8-bis((1 <i>E</i> ,3 <i>E</i> ,5 <i>E</i> )-2-butyl-6-methoxycarbonylhepta-1,3,5-trien-1-yl)dibenzo[ <i>d,d'</i> ]benzo[2,1- <i>b:3,4-b'</i> ]difuran ( <b>9a</b> ) | 23 |
| <b>Figure S19.</b> High resolution mass spectrum (APCI) of 3,8-bis((1 <i>E</i> ,3 <i>E</i> ,5 <i>E</i> )-2-butyl-6-methoxycarbonylhepta-1,3,5-trien-1-yl)dibenzo[ <i>d,d'</i> ]benzo[2,1- <i>b:3,4-b'</i> ]difuran ( <b>9a</b> )       | 24 |
| <b>Figure S20.</b> $^1\text{H}$ NMR Spectrum of 3,8-bis(6-methoxycarbonyl-2-trimethylsilylhepta-1,3,5-trien-1-yl)dibenzo[ <i>d,d'</i> ]benzo[2,1- <i>b:3,4-b'</i> ]difuran ( <b>9b</b> )                                               | 25 |
| <b>Figure S21.</b> $^{13}\text{C}\{^1\text{H}\}$ NMR Spectrum of 3,8-bis(6-methoxycarbonyl-2-trimethylsilylhepta-1,3,5-trien-1-yl)dibenzo[ <i>d,d'</i> ]benzo[2,1- <i>b:3,4-b'</i> ]difuran ( <b>9b</b> )                              | 26 |
| <b>Figure S22.</b> High resolution mass spectrum (APCI) of 3,8-bis(6-methoxycarbonyl-2-trimethylsilylhepta-1,3,5-trien-1-yl)dibenzo[ <i>d,d'</i> ]benzo[2,1- <i>b:3,4-b'</i> ]difuran ( <b>9b</b> )                                    | 27 |



|                                                                                                                                                                                                                               |    |
|-------------------------------------------------------------------------------------------------------------------------------------------------------------------------------------------------------------------------------|----|
| <b>Figure S23.</b> $^1\text{H}$ NMR Spectrum of 3,8-bis{(1 <i>E</i> ,3 <i>E</i> ,5 <i>E</i> )-2-trimethylsilylhepta-1,3,5-trien-1-yl}dibenzo[ <i>d,d'</i> ]benzo[2,1- <i>b:3,4-b'</i> ]difuran ( <b>9c</b> )                  | 28 |
| <b>Figure S24.</b> $^{13}\text{C}\{^1\text{H}\}$ NMR Spectrum of 3,8-bis{(1 <i>E</i> ,3 <i>E</i> ,5 <i>E</i> )-2-trimethylsilylhepta-1,3,5-trien-1-yl}dibenzo[ <i>d,d'</i> ]benzo[2,1- <i>b:3,4-b'</i> ]difuran ( <b>9c</b> ) | 29 |
| <b>Figure S25.</b> High resolution mass spectrum (APCI) of 3,8-bis{(1 <i>E</i> ,3 <i>E</i> ,5 <i>E</i> )-2-trimethylsilylhepta-1,3,5-trien-1-yl}dibenzo[ <i>d,d'</i> ]benzo[2,1- <i>b:3,4-b'</i> ]difuran ( <b>9c</b> )       | 30 |
| <b>Figure S26.</b> $^1\text{H}$ NMR Spectrum of 3,8-bis{(1 <i>E</i> ,3 <i>E</i> ,5 <i>E</i> )-6-methoxycarbonylhepta-1,3,5-trien-1-yl}dibenzo[ <i>d,d'</i> ]benzo[2,1- <i>b:3,4-b'</i> ]difuran ( <b>10b</b> )                | 31 |
| <b>Figure S27.</b> High resolution mass spectrum (APCI) of 3,8-bis{(1 <i>E</i> ,3 <i>E</i> ,5 <i>E</i> )-6-methoxycarbonylhepta-1,3,5-trien-1-yl}dibenzo[ <i>d,d'</i> ]benzo[2,1- <i>b:3,4-b'</i> ]difuran ( <b>10b</b> )     | 32 |
| <b>Figure S28.</b> $^1\text{H}$ NMR Spectrum of 3-decylanisole                                                                                                                                                                | 33 |
| <b>Figure S29.</b> $^1\text{H}$ NMR Spectrum of 2,3-difluoro-4-iodo-2',4'-dimethoxy-1,1'-biphenyl ( <b>11</b> )                                                                                                               | 34 |
| <b>Figure S30.</b> $^1\text{H}$ NMR Spectrum of 2-(4-decyl-2-methoxyphenyl)-4,4-5,5-tetramethyl-1,3,2-dioxaborolane ( <b>12</b> )                                                                                             | 35 |
| <b>Figure S31.</b> $^1\text{H}$ NMR Spectrum of 4-decyl-2,3-difluoro-4-iodo-2'-methoxy-1,1'-biphenyl ( <b>13</b> )                                                                                                            | 36 |
| <b>Figure S32.</b> $^1\text{H}$ NMR Spectrum of 4-decyl-2',3'-difluoro-2,2'',4''-trimethoxy-1,1':4',1''-terphenyl ( <b>14</b> )                                                                                               | 37 |
| <b>Figure S33.</b> $^{13}\text{C}\{^1\text{H}\}$ NMR Spectrum of 4-decyl-2',3'-difluoro-2,2'',4''-trimethoxy-1,1':4',1''-terphenyl ( <b>14</b> )                                                                              | 38 |
| <b>Figure S34.</b> $^{19}\text{F}$ NMR Spectrum of 4-decyl-2',3'-difluoro-2,2'',4''-trimethoxy-1,1':4',1''-terphenyl ( <b>14</b> )                                                                                            | 39 |
| <b>Figure S35.</b> $^1\text{H}$ NMR Spectrum of 4''-decyl-2',3'-difluoro[1,1':4',1''-terphenyl]-2,2'',4-triol ( <b>15</b> )                                                                                                   | 40 |
| <b>Figure S36.</b> $^{13}\text{C}\{^1\text{H}\}$ NMR Spectrum of 4''-decyl-2',3'-difluoro[1,1':4',1''-terphenyl]-2,2'',4-triol ( <b>15</b> )                                                                                  | 41 |
| <b>Figure S37.</b> $^{19}\text{F}$ NMR Spectrum of 4''-decyl-2',3'-difluoro[1,1':4',1''-terphenyl]-2,2'',4-triol ( <b>15</b> )                                                                                                | 42 |
| <b>Figure S38.</b> $^1\text{H}$ NMR Spectrum of 8-decyldibenzo[ <i>d,d'</i> ]benzo[2,1- <i>b:3,4-b'</i> ]difuran-3-ol ( <b>16</b> )                                                                                           | 43 |
| <b>Figure S39.</b> $^{13}\text{C}\{^1\text{H}\}$ NMR Spectrum of 8-decyldibenzo[ <i>d,d'</i> ]benzo[2,1- <i>b:3,4-b'</i> ]difuran-3-ol ( <b>16</b> )                                                                          | 44 |
| <b>Figure S40.</b> $^1\text{H}$ NMR Spectrum of 8-decyldibenzo[ <i>d,d'</i> ]benzo[2,1- <i>b:3,4-b'</i> ]difuran-3-yltrifluoromethanesulfonate ( <b>17</b> )                                                                  | 45 |
| <b>Figure S41.</b> $^{13}\text{C}\{^1\text{H}\}$ NMR Spectrum of 8-decyldibenzo[ <i>d,d'</i> ]benzo[2,1- <i>b:3,4-b'</i> ]difuran-3-yltrifluoromethanesulfonate ( <b>17</b> )                                                 | 46 |
| <b>Figure S42.</b> $^{19}\text{F}$ NMR Spectrum of 8-decyldibenzo[ <i>d,d'</i> ]benzo[2,1- <i>b:3,4-b'</i> ]difuran-3-yltrifluoromethanesulfonate ( <b>17</b> )                                                               | 47 |
| <b>Figure S43.</b> $^1\text{H}$ NMR Spectrum of 3-(trimethylsilylethynyl)-8-decyldibenzo[ <i>d,d'</i> ]benzo[2,1- <i>b:3,4-b'</i> ]difuran ( <b>18</b> )                                                                      | 48 |
| <b>Figure S44.</b> $^{13}\text{C}\{^1\text{H}\}$ NMR Spectrum of 3-(trimethylsilylethynyl)-8-decyldibenzo[ <i>d,d'</i> ]benzo[2,1- <i>b:3,4-b'</i> ]difuran ( <b>18</b> )                                                     | 49 |
| <b>Figure S45.</b> $^1\text{H}$ NMR Spectrum of 3-(6-methoxycarbonyl-2-trimethylsilylhexa-1,3,5-trien-1-yl)-8-decyldibenzo[ <i>d,d'</i> ]benzo[2,1- <i>b:3,4-b'</i> ]difuran ( <b>19a</b> )                                   | 50 |

|                                                                                                                                                                                                                                    |    |
|------------------------------------------------------------------------------------------------------------------------------------------------------------------------------------------------------------------------------------|----|
| <b>Figure S46.</b> $^{13}\text{C}\{^1\text{H}\}$ NMR Spectrum of 3-(6-methoxycarbonyl-2-trimethylsilylhexa-1,3,5-trien-1-yl)-8-decyldibenzo[ <i>d,d'</i> ]benzo[2,1- <i>b:3,4-b'</i> ]difuran ( <b>19a</b> )                       | 51 |
| <b>Figure S47.</b> High resolution mass spectrum (APCI) of 3-(6-methoxycarbonyl-2-trimethylsilylhexa-1,3,5-trien-1-yl)-8-decyldibenzo[ <i>d,d'</i> ]benzo[2,1- <i>b:3,4-b'</i> ]difuran ( <b>19a</b> )                             | 52 |
| <b>Figure S48.</b> $^1\text{H}$ NMR Spectrum of 3-((1 <i>E</i> ,3 <i>E</i> ,5 <i>E</i> )-2-trimethylsilylhepta-1,3,5-trien-1-yl)-8-decyldibenzo[ <i>d,d'</i> ]benzo[2,1- <i>b:3,4-b'</i> ]difuran ( <b>19b</b> )                   | 53 |
| <b>Figure S49.</b> $^{13}\text{C}\{^1\text{H}\}$ NMR Spectrum of 3-((1 <i>E</i> ,3 <i>E</i> ,5 <i>E</i> )-2-trimethylsilylhepta-1,3,5-trien-1-yl)-8-decyldibenzo[ <i>d,d'</i> ]benzo[2,1- <i>b:3,4-b'</i> ]difuran ( <b>19b</b> )  | 54 |
| <b>Figure S50.</b> High resolution mass spectrum (APCI) of 3-((1 <i>E</i> ,3 <i>E</i> ,5 <i>E</i> )-2-trimethylsilylhepta-1,3,5-trien-1-yl)-8-decyldibenzo[ <i>d,d'</i> ]benzo[2,1- <i>b:3,4-b'</i> ]difuran ( <b>19b</b> )        | 55 |
| <b>Figure S51.</b> $^1\text{H}$ NMR Spectrum of 3-((1 <i>E</i> ,3 <i>E</i> ,5 <i>E</i> )-6-methoxycarbonylhepta-1,3,5-trien-1-yl)-8-decyldibenzo[ <i>d,d'</i> ]benzo[2,1- <i>b:3,4-b'</i> ]difuran ( <b>20a</b> )                  | 56 |
| <b>Figure S52.</b> $^{13}\text{C}\{^1\text{H}\}$ NMR Spectrum of 3-((1 <i>E</i> ,3 <i>E</i> ,5 <i>E</i> )-6-methoxycarbonylhepta-1,3,5-trien-1-yl)-8-decyldibenzo[ <i>d,d'</i> ]benzo[2,1- <i>b:3,4-b'</i> ]difuran ( <b>20a</b> ) | 57 |
| <b>Figure S53.</b> High resolution mass spectrum (APIC) of 3-((1 <i>E</i> ,3 <i>E</i> ,5 <i>E</i> )-6-methoxycarbonylhepta-1,3,5-trien-1-yl)-8-decyldibenzo[ <i>d,d'</i> ]benzo[2,1- <i>b:3,4-b'</i> ]difuran ( <b>20a</b> )       | 58 |
| <b>Figure S54.</b> UV-vis spectrum of <b>9a</b> ( $1.00 \times 10^{-5}$ M) in chloroform                                                                                                                                           | 59 |
| <b>Figure S55.</b> UV-vis spectrum of <b>10b</b> ( $1.00 \times 10^{-5}$ M) in chloroform                                                                                                                                          | 59 |
| <b>Figure S56.</b> UV-vis spectrum of <b>20a</b> ( $1.00 \times 10^{-5}$ M) in chloroform                                                                                                                                          | 60 |
| <b>Figure S57.</b> Cyclic voltammogram of <b>9a</b>                                                                                                                                                                                | 60 |
| <b>Figure S58.</b> Cyclic voltammogram of <b>10b</b>                                                                                                                                                                               | 61 |
| <b>Figure S59.</b> Cyclic voltammogram of <b>20a</b>                                                                                                                                                                               | 61 |
| <b>Figure S60.</b> Top and side views of TD-DFT calculations of isomer A of <b>9a</b>                                                                                                                                              | 62 |
| <b>Figure S61.</b> Top and side views of TD-DFT calculations of isomer B of <b>9a</b>                                                                                                                                              | 63 |
| <b>Figure S62.</b> Selected orbitals by TD-DFT calculations of isomer A of <b>9a</b> in chloroform                                                                                                                                 | 64 |
| <b>Figure S63.</b> Selected orbitals by TD-DFT calculations of isomer B of <b>9a</b> in chloroform                                                                                                                                 | 67 |
| <b>Figure S64.</b> Top and side views of TD-DFT calculations of <b>10b</b>                                                                                                                                                         | 69 |
| <b>Figure S65.</b> Selected orbitals by TD-DFT calculations of <b>10b</b>                                                                                                                                                          | 70 |
| <b>Figure S66.</b> Top and Side views of TD-DFT calculations of <b>21a</b>                                                                                                                                                         | 72 |
| <b>Figure S67.</b> Selected orbitals by TD-DFT calculations of <b>21a</b>                                                                                                                                                          | 73 |
| <b>Figure S68.</b> Top and side views of TD-DFT calculations of isomer A of <b>22</b>                                                                                                                                              | 75 |
| <b>Figure S69.</b> Top and side views of TD-DFT calculations of isomer B of <b>22</b>                                                                                                                                              | 76 |
| <b>Figure S70.</b> Selected orbitals by TD-DFT calculations of isomer A of <b>22</b>                                                                                                                                               | 77 |
| <b>Figure S71.</b> Selected orbitals by TD-DFT calculations of isomer B of <b>22</b>                                                                                                                                               | 80 |

---

|                                                                                                |     |
|------------------------------------------------------------------------------------------------|-----|
| <b>Figure S72.</b> Calculated Uv-vis spectrum of isomer A of <b>9a</b> in chloroform by TD-DFT | 82  |
| <b>Figure S73.</b> Calculated Uv-vis spectrum of isomer B of <b>9a</b> in chloroform by TD-DFT | 82  |
| <b>Figure S74.</b> Calculated Uv-vis spectrum of <b>10b</b>                                    | 83  |
| <b>Figure S75.</b> Calculated Uv-vis spectrum of <b>21a</b>                                    | 83  |
| <b>Figure S76.</b> Calculated Uv-vis spectrum of isomer A of <b>22</b>                         | 83  |
| <b>Figure S77.</b> Calculated Uv-vis spectrum of isomer B of <b>22</b>                         | 84  |
| <b>Table S1.</b> TD-DFT results for <b>9a</b> (isomer A) in chloroform                         | 69  |
| <b>Table S2.</b> TD-DFT results for <b>9a</b> (isomer B) in chloroform                         | 77  |
| <b>Table S3.</b> TD-DFT results for <b>10b</b> in chloroform                                   | 101 |
| <b>Table S4.</b> TD-DFT results for <b>21a</b> in chloroform                                   | 112 |
| <b>Table S5.</b> TD-DFT results for <b>22</b> (isomer A) in chloroform                         | 125 |
| <b>Table S6.</b> TD-DFT results for <b>22</b> (isomer B) in chloroform                         | 135 |
| <b>Table S7.</b> Cartesian coordinates of isomer A of <b>9a</b> by TD-DFT calculations         | 145 |
| <b>Table S8.</b> Cartesian coordinates of isomer B of <b>9a</b> by TD-DFT calculations         | 149 |
| <b>Table S9.</b> Cartesian coordinates of <b>10b</b> by TD-DFT calculations                    | 153 |
| <b>Table S10.</b> Cartesian coordinates of <b>21a</b> by TD-DFT calculations                   | 156 |
| <b>Table S11.</b> Cartesian coordinates of isomer A of <b>22</b> by TD-DFT calculations        | 159 |
| <b>Table S12.</b> Cartesian coordinates of isomer B of <b>22</b> by TD-DFT calculations        | 162 |

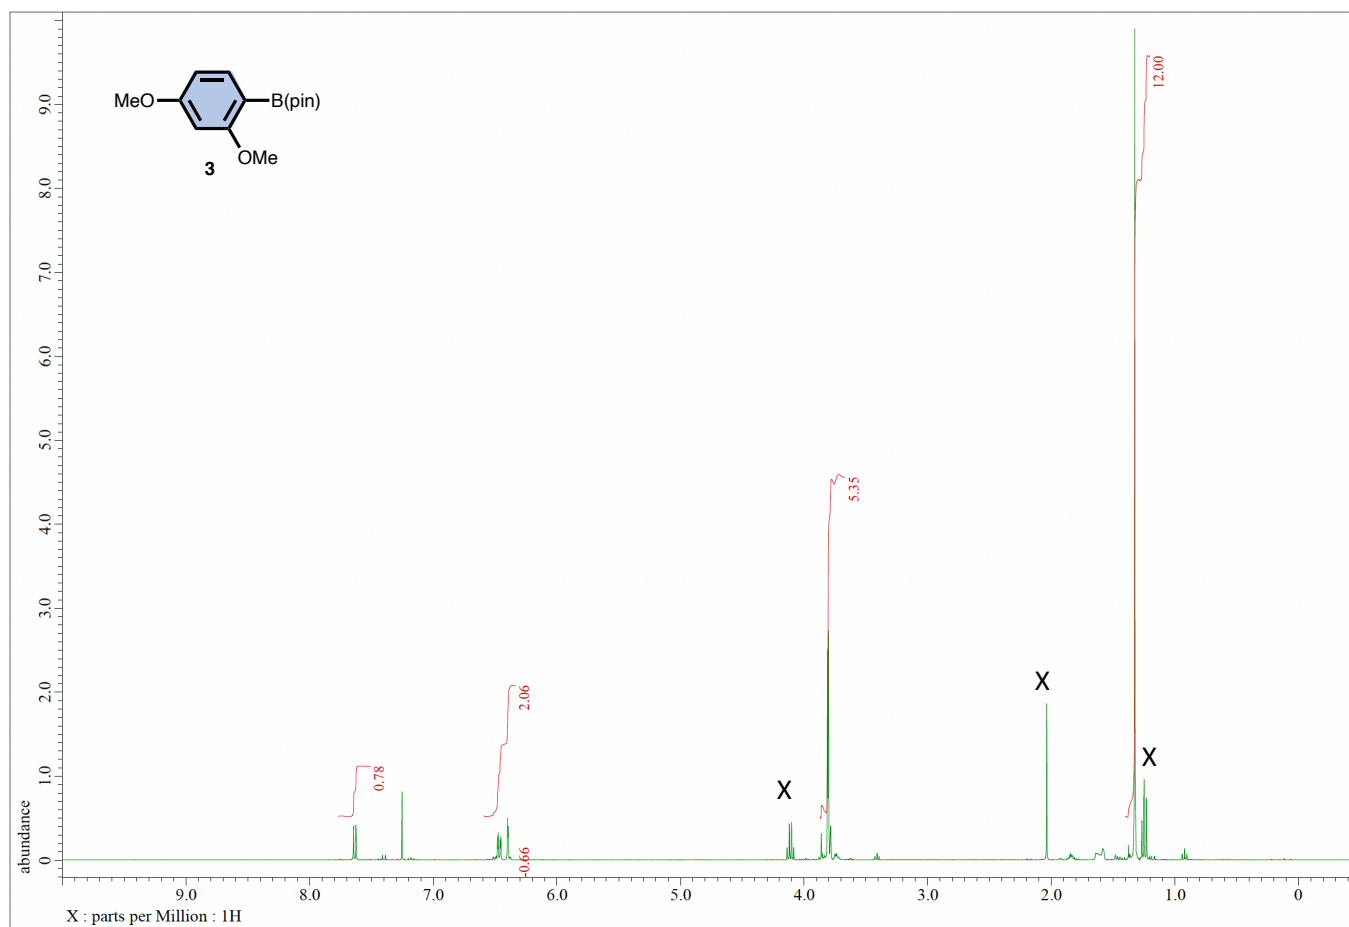

**Figure S1.**  $^1\text{H}$  NMR Spectrum of 2-(2,4-dimethoxyphenyl)-4,4,5,5-tetramethyl-1,3,2-dioxaborolane (**3**) (400 MHz,  $\text{CDCl}_3$ , r.t.). Xs indicate incorporated ethyl acetate.

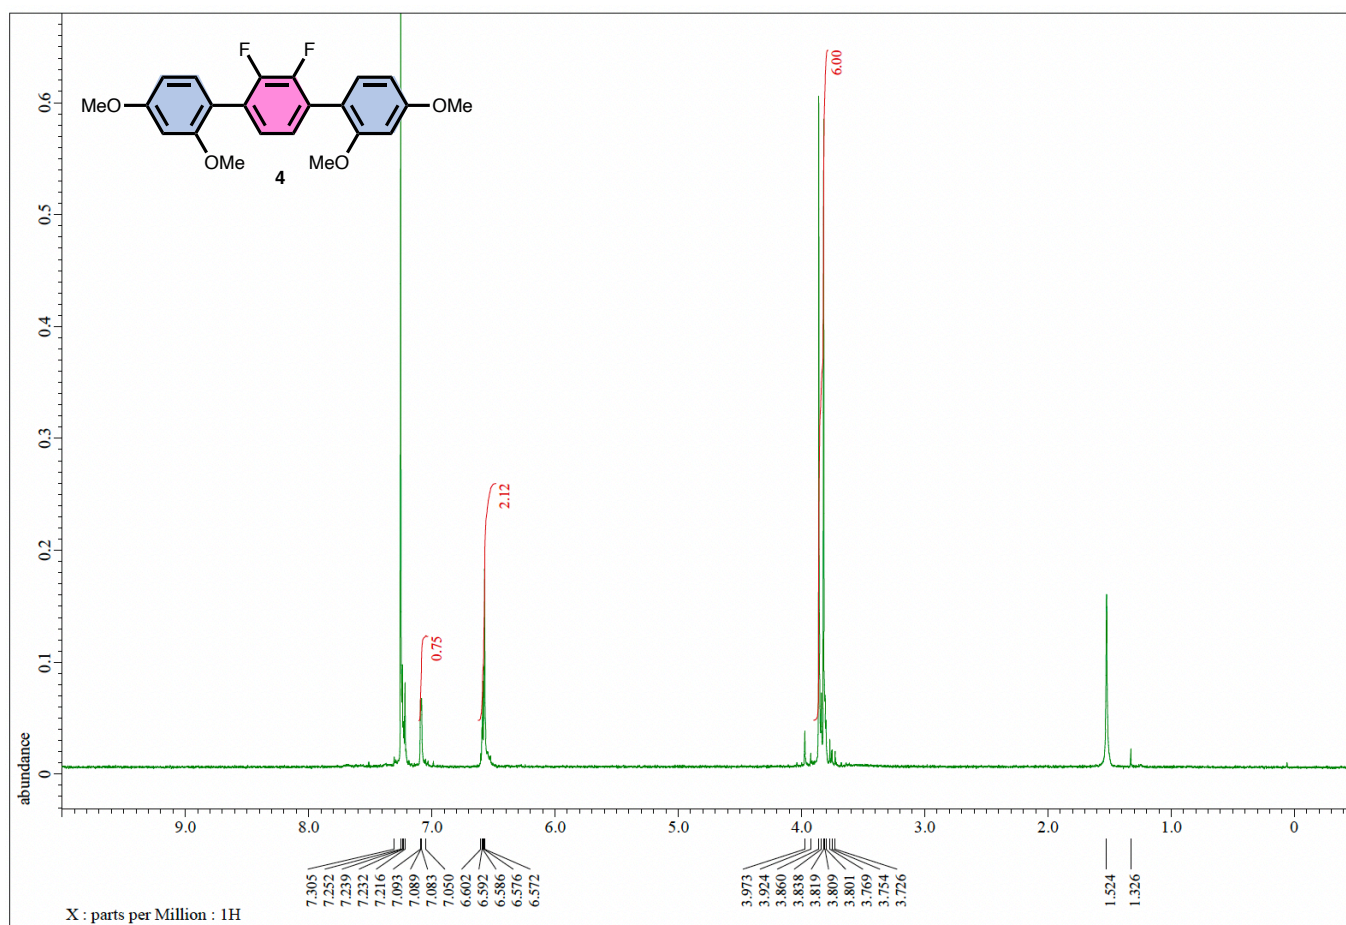

Figure S2.  $^1\text{H}$  NMR Spectrum of 2,3-difluoro-1,4-bis(2,4-dimethoxyphenyl)benzene (**4**) (400 MHz,  $\text{CDCl}_3$ , r.t.).

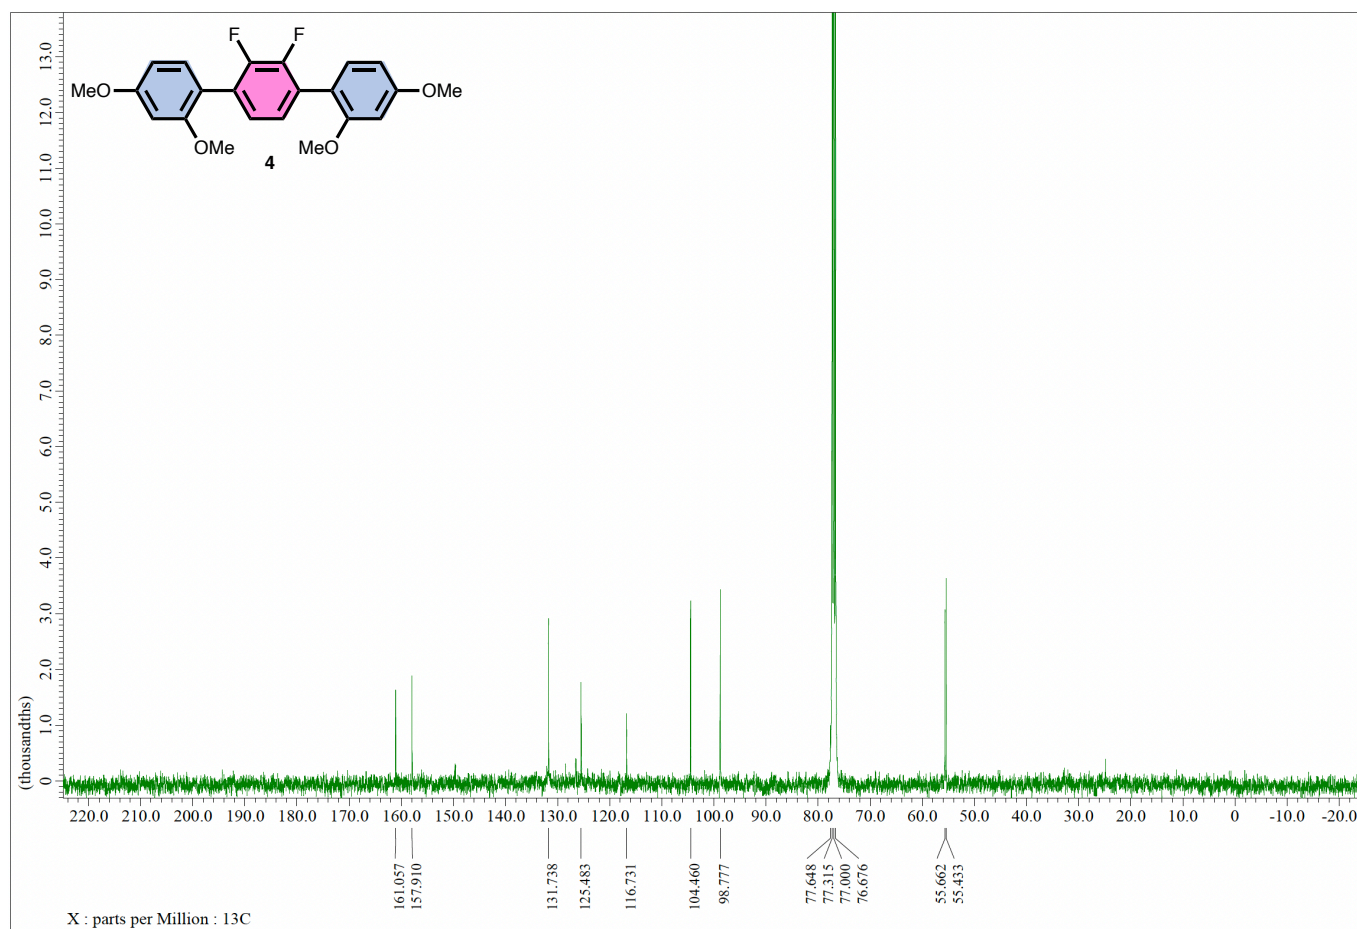

**Figure S3.**  $^{13}\text{C}\{^1\text{H}\}$  NMR Spectrum of 2,3-difluoro-1,4-bis(2,4-dimethoxyphenyl)benzene (**4**) (100 MHz,  $\text{CDCl}_3$ , r.t.).

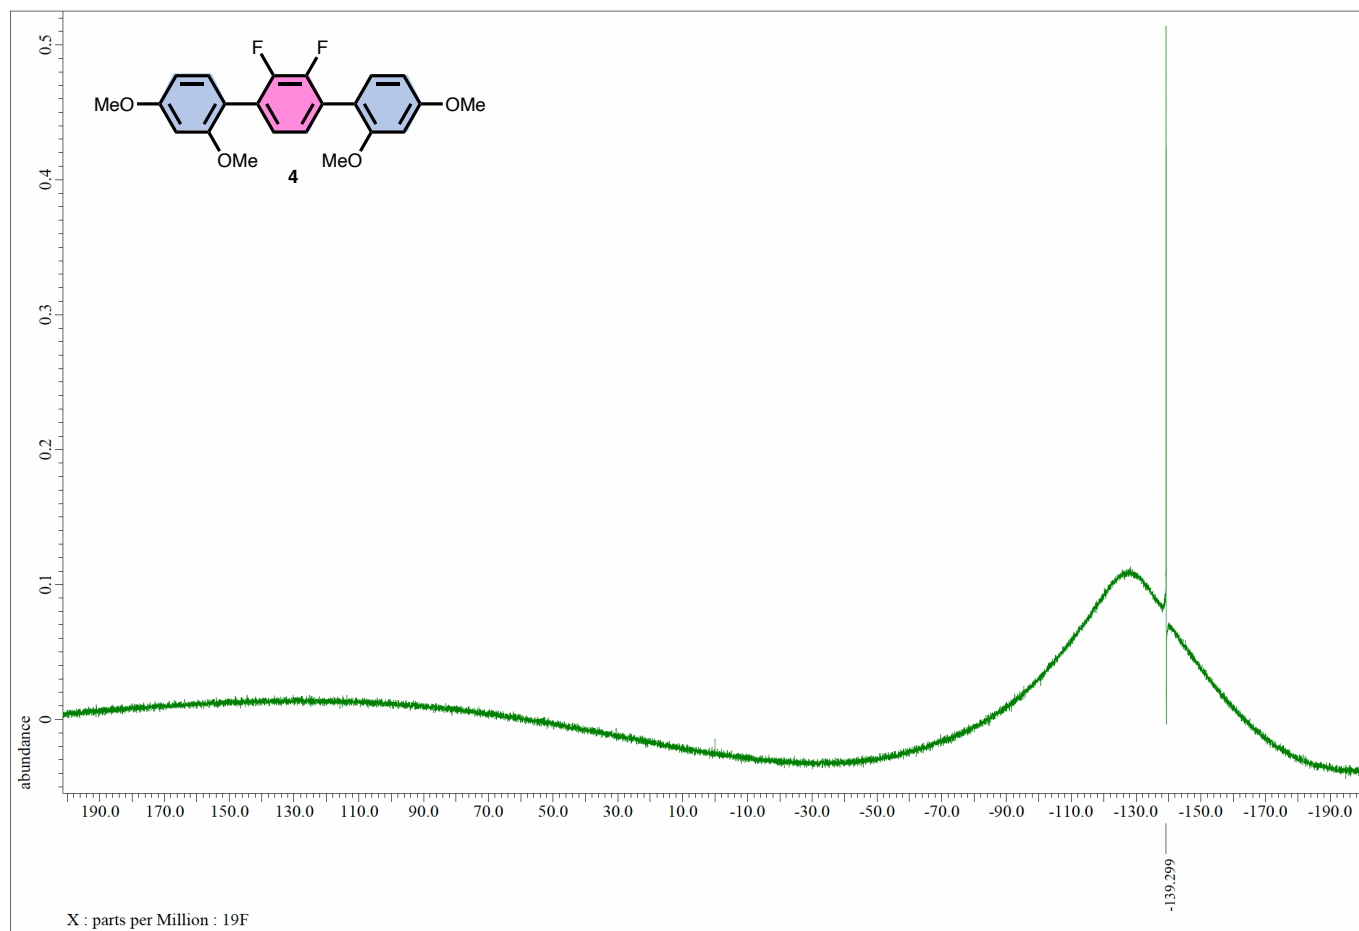

**Figure S4.**  $^{19}\text{F}$  NMR Spectrum of 2,3-difluoro-1,4-bis(2,4-dimethoxyphenyl)benzene (**4**) (376 MHz,  $\text{CDCl}_3$ , r.t.).



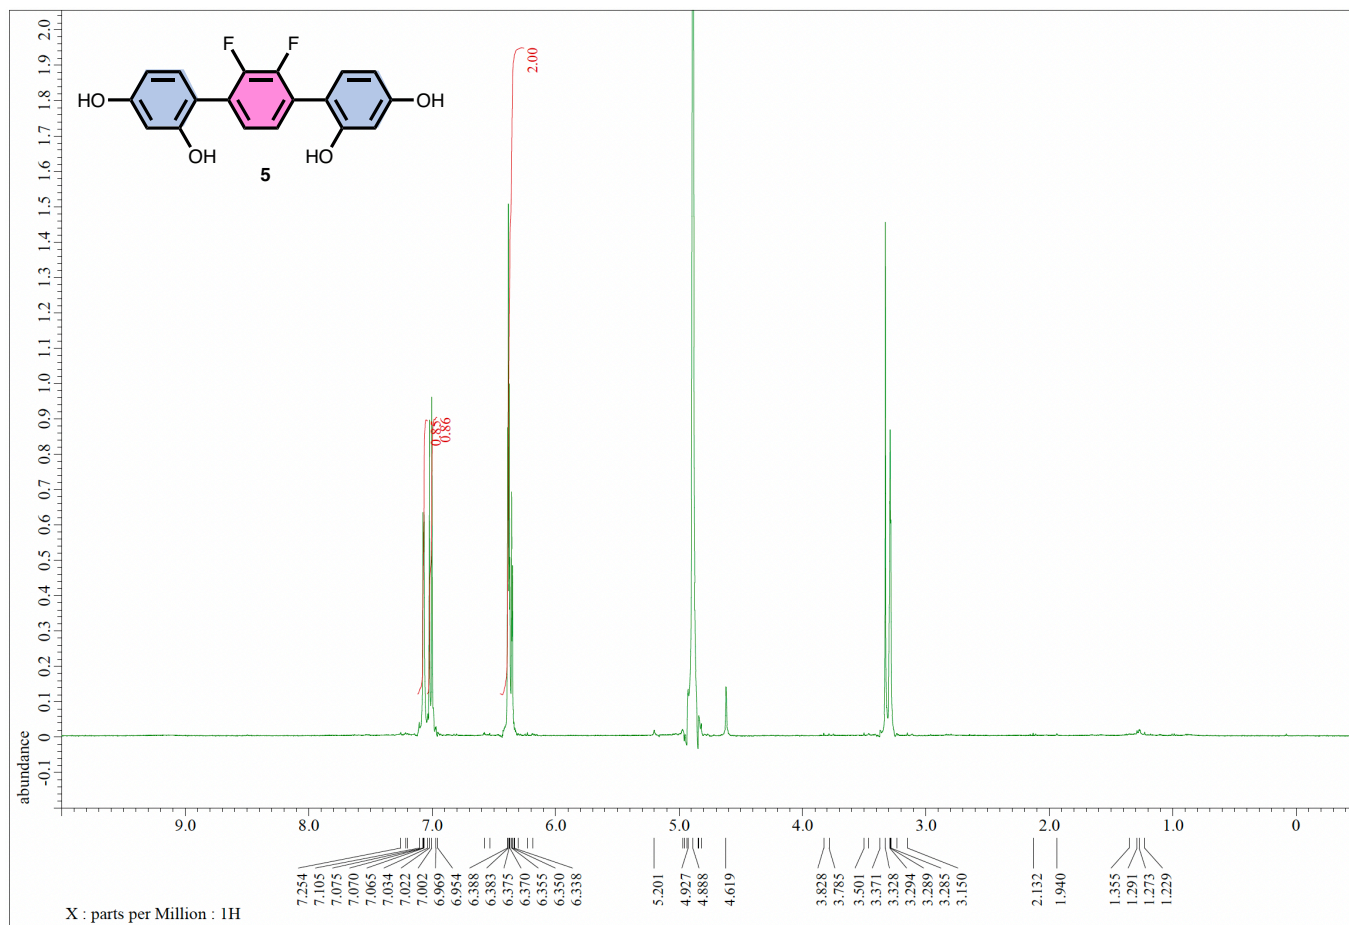

Figure S5. <sup>1</sup>H NMR Spectrum of 2,3-difluoro-1,4-bis(2,4-dihydroxyphenyl)benzene (5) (400 MHz, CD<sub>3</sub>OD, r.t.).



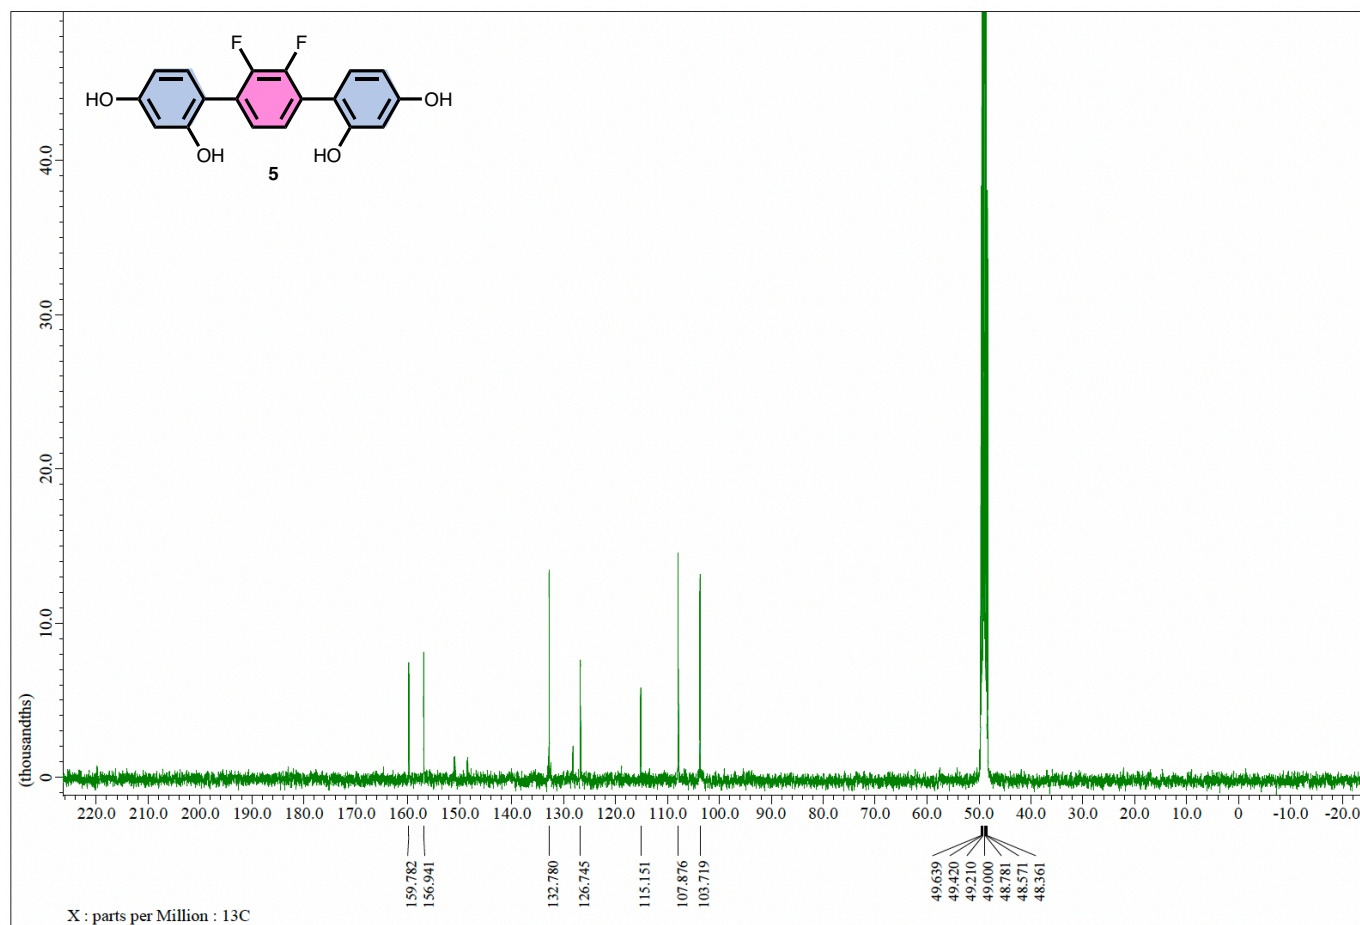

Figure S6.  $^{13}\text{C}\{^1\text{H}\}$  NMR Spectrum of 2,3-difluoro-1,4-bis(2,4-dihydroxyphenyl)benzene (5) (100 MHz,  $\text{CD}_3\text{OD}$ , r.t.).

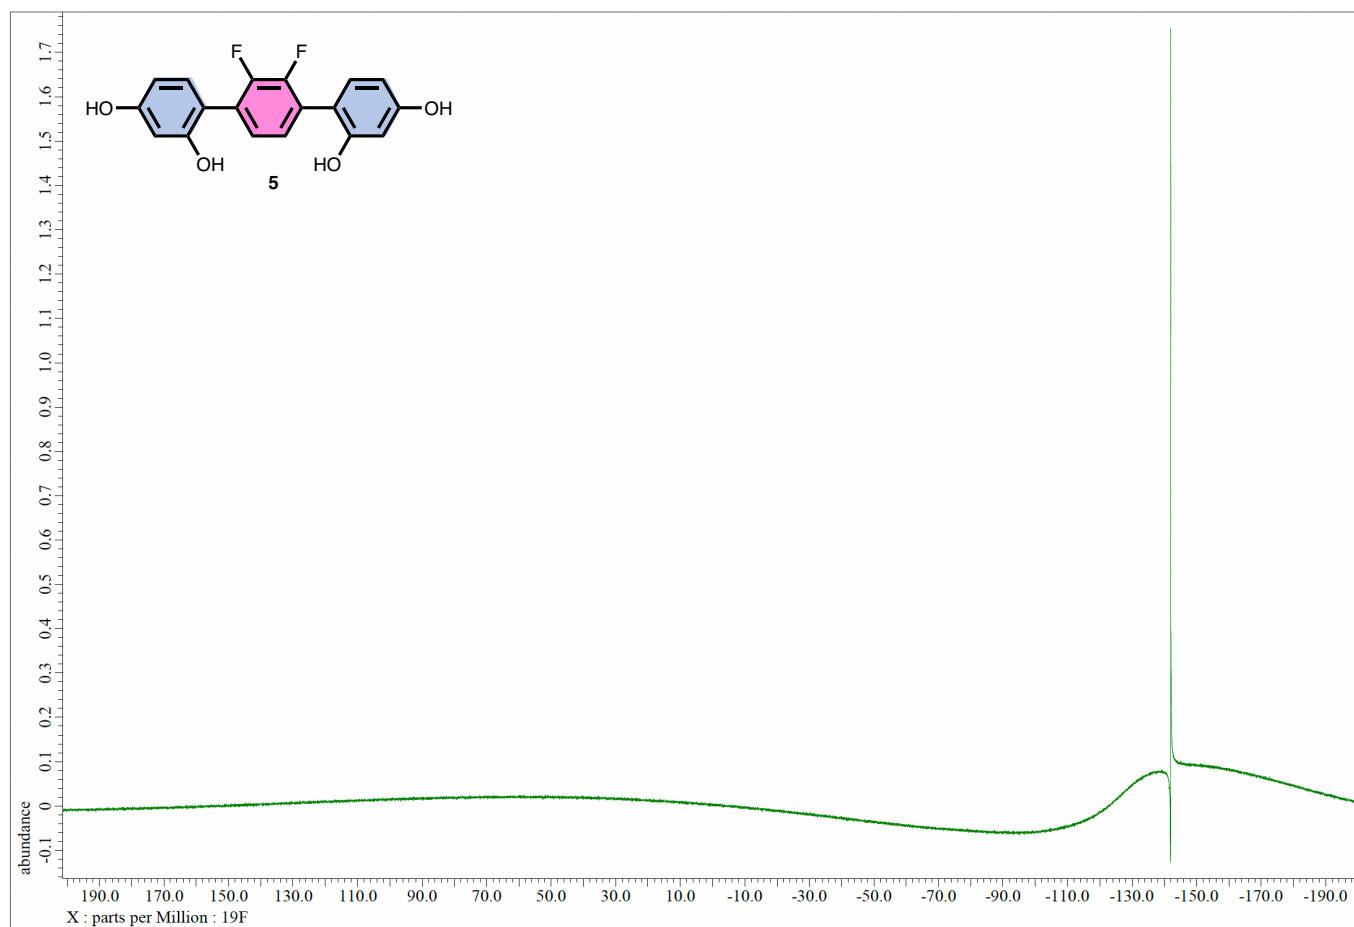

**Figure S7.**  $^{19}\text{F}$  NMR Spectrum of 2,3-difluoro-1,4-bis(2,4-dihydroxyphenyl)benzene (**5**) (376 MHz,  $\text{CD}_3\text{OD}$ , r.t.).

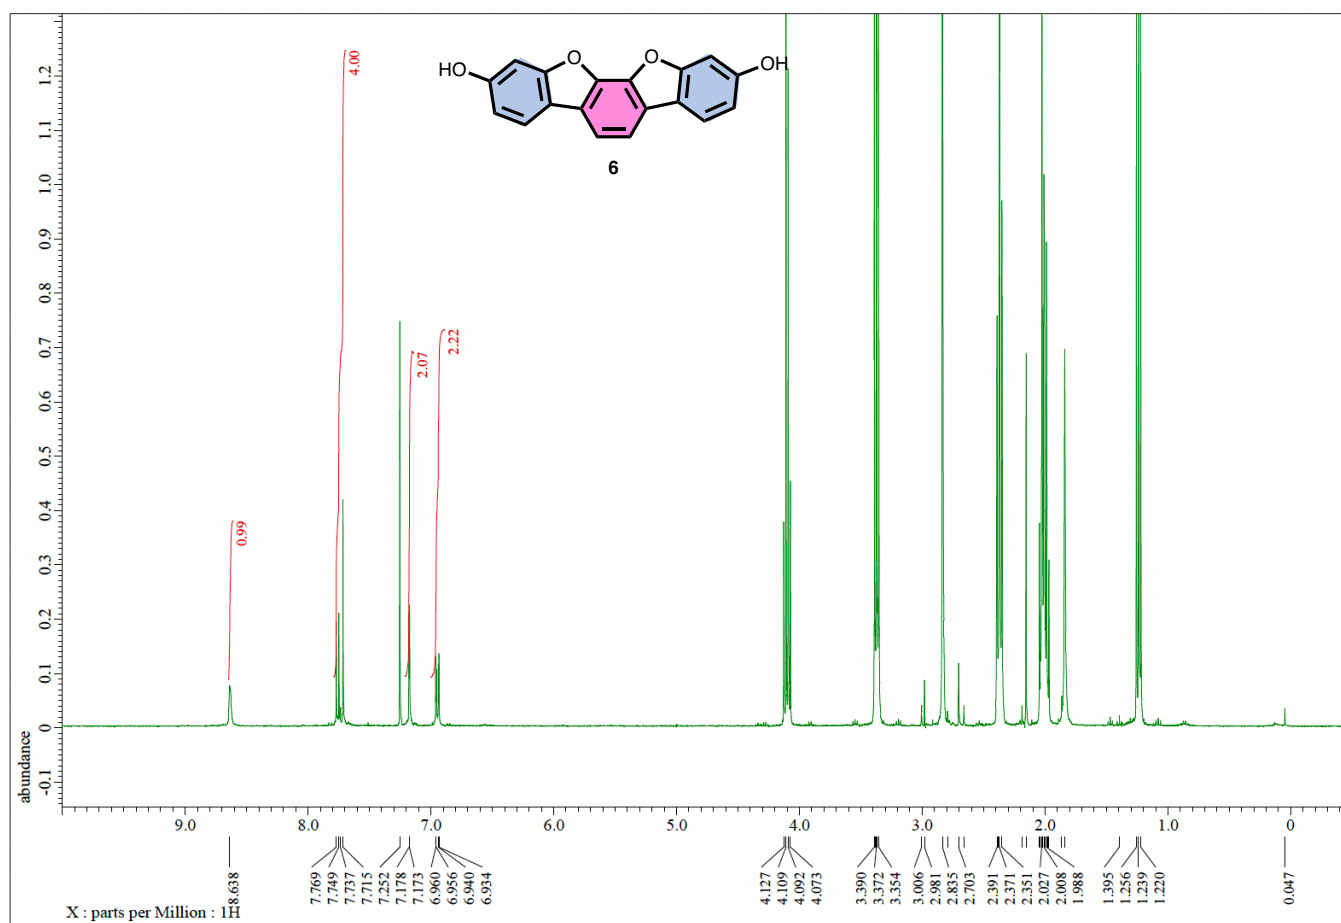

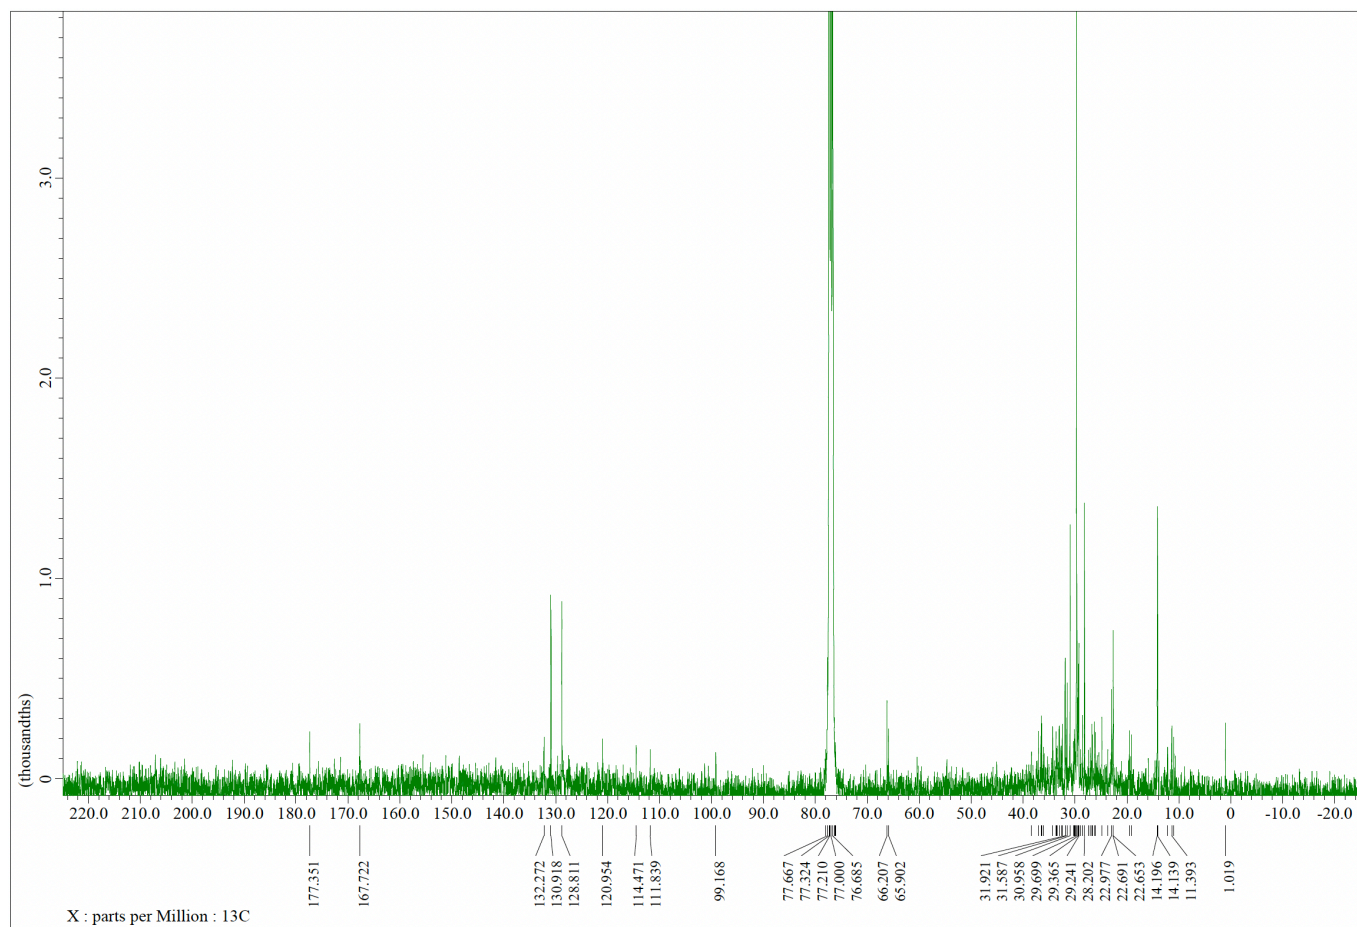

**Figure S9.**  $^{13}\text{C}\{^1\text{H}\}$  NMR Spectrum of dibenzo[*d,d'*]benzo[2,1-*b*:3,4-*b'*]difuran-3,8-diol (**6**) (100 MHz,  $\text{CDCl}_3$ , r.t.).

Because compound shows low solubility to the solvent, impurities were found in the aliphatic region.

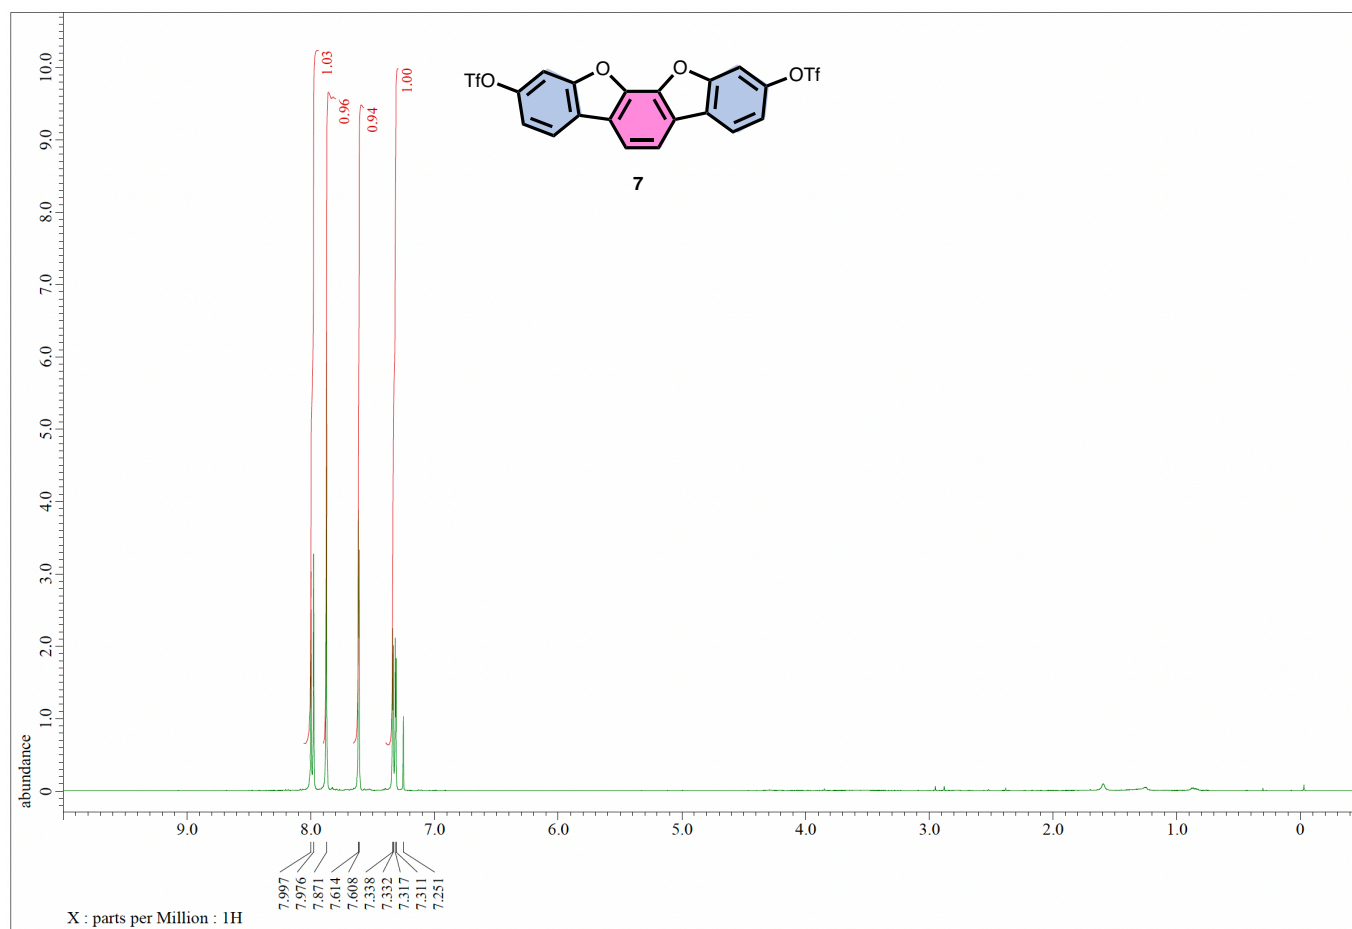



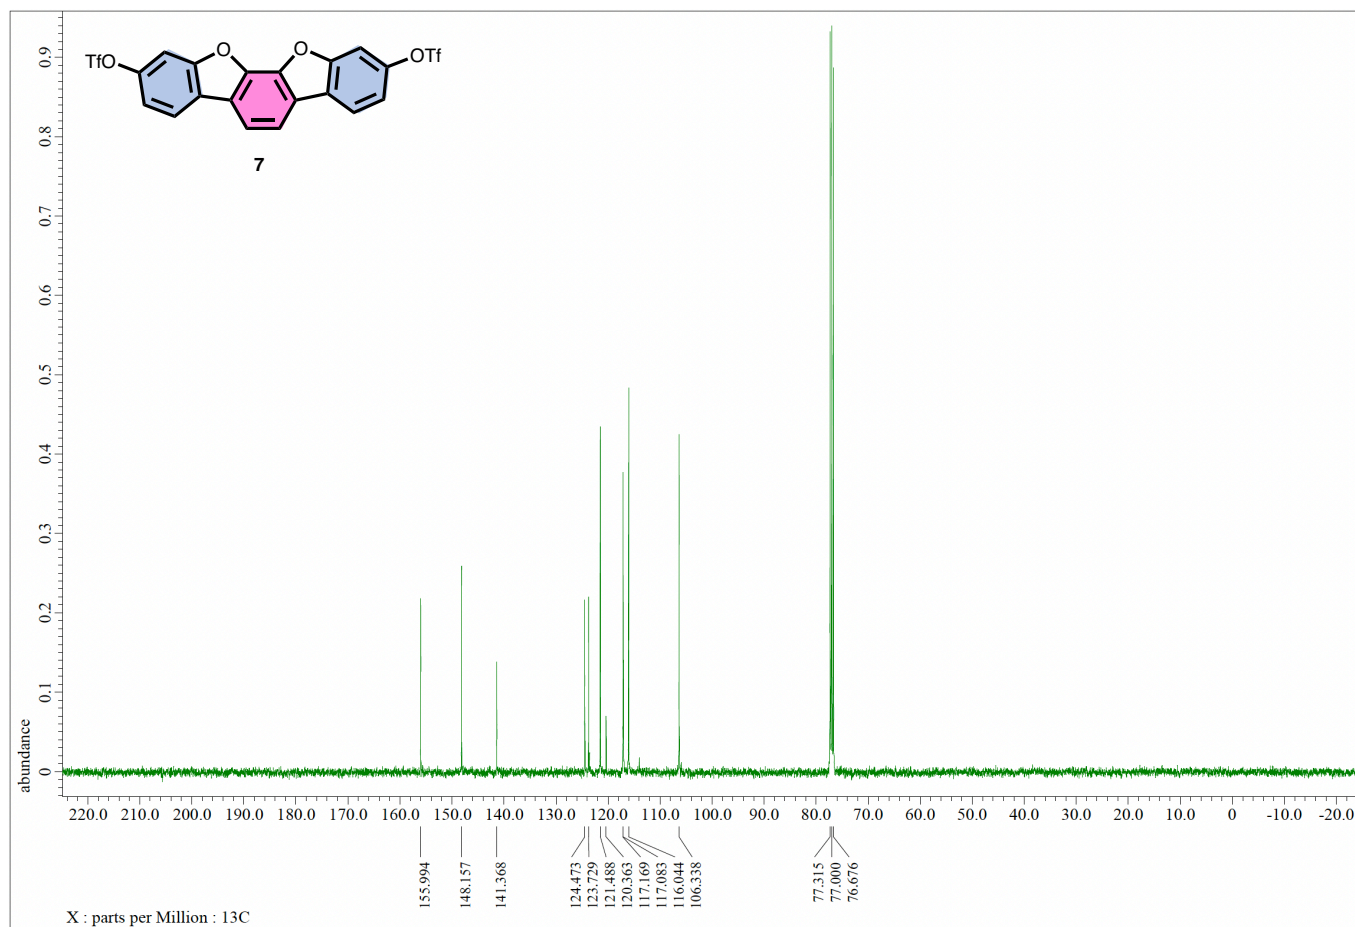

**Figure S11.**  $^{13}\text{C}\{^1\text{H}\}$  NMR Spectrum of dibenzo[*d,d'*]benzo[2,1-*b*:3,4-*b'*]difuran-3,8-diyotrifluoromethanesulfonate (**7**) (100 MHz,  $\text{CDCl}_3$ , r.t.).

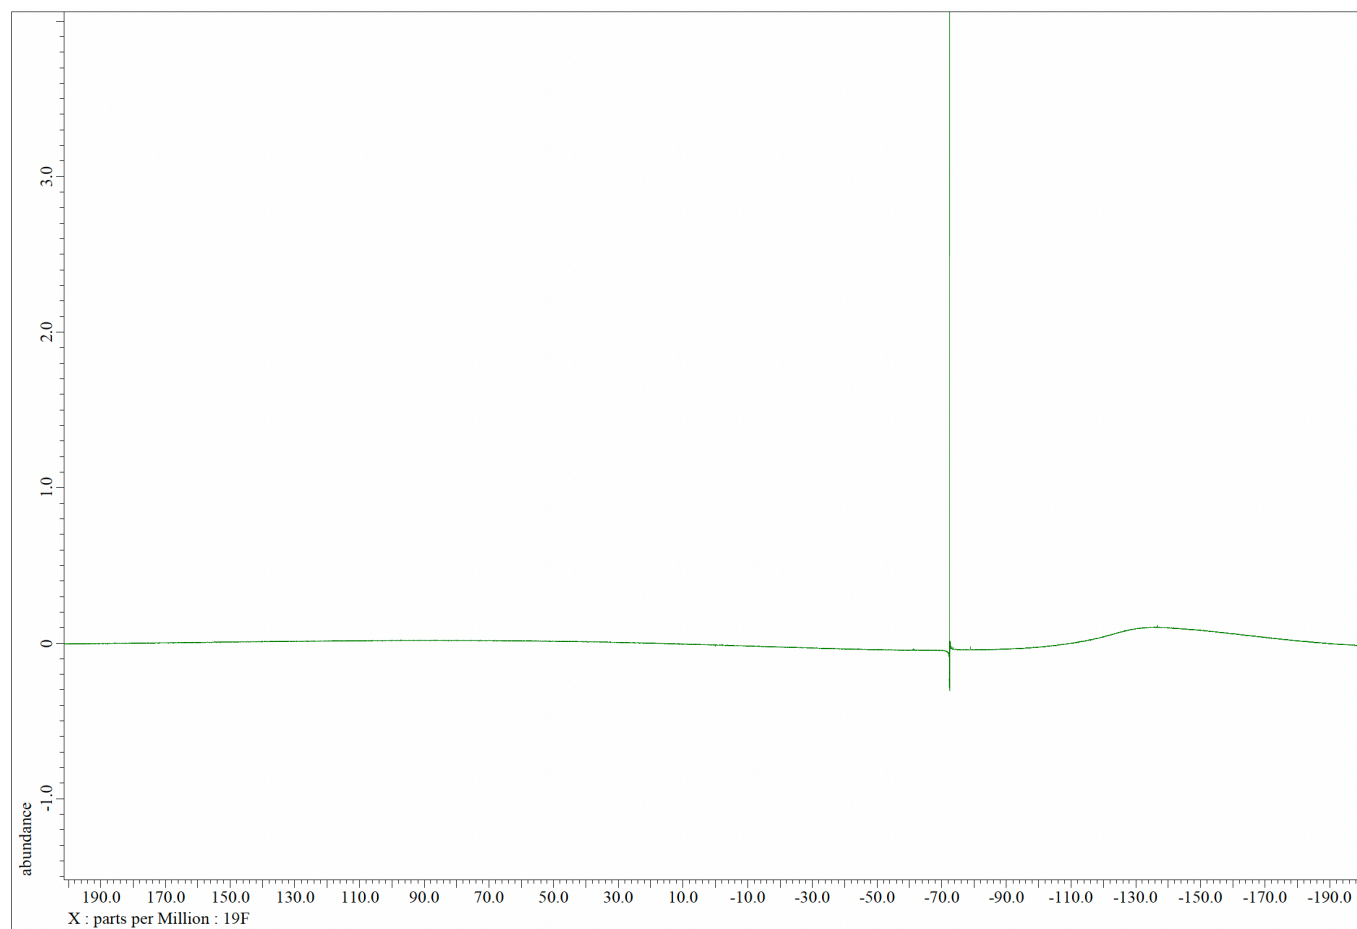

**Figure S12.**  $^{19}\text{F}$  NMR Spectrum of dibenzo[*d,d'*]benzo[2,1-*b*:3,4-*b'*]difuran-3,8-diyltrifluoromethanesulfonate (**7**) (376 MHz,  $\text{CDCl}_3$ , r.t.).

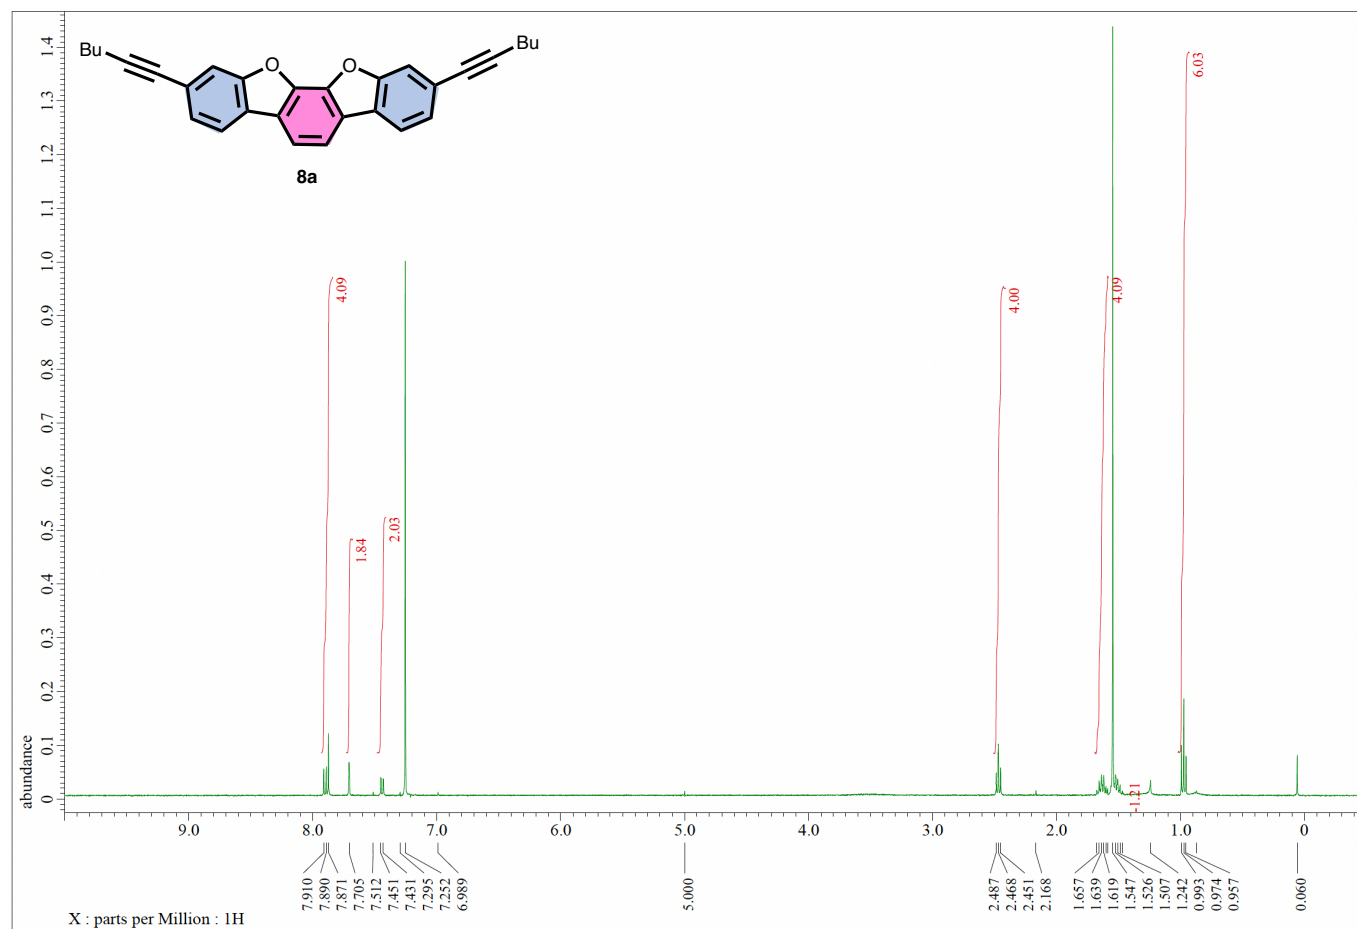



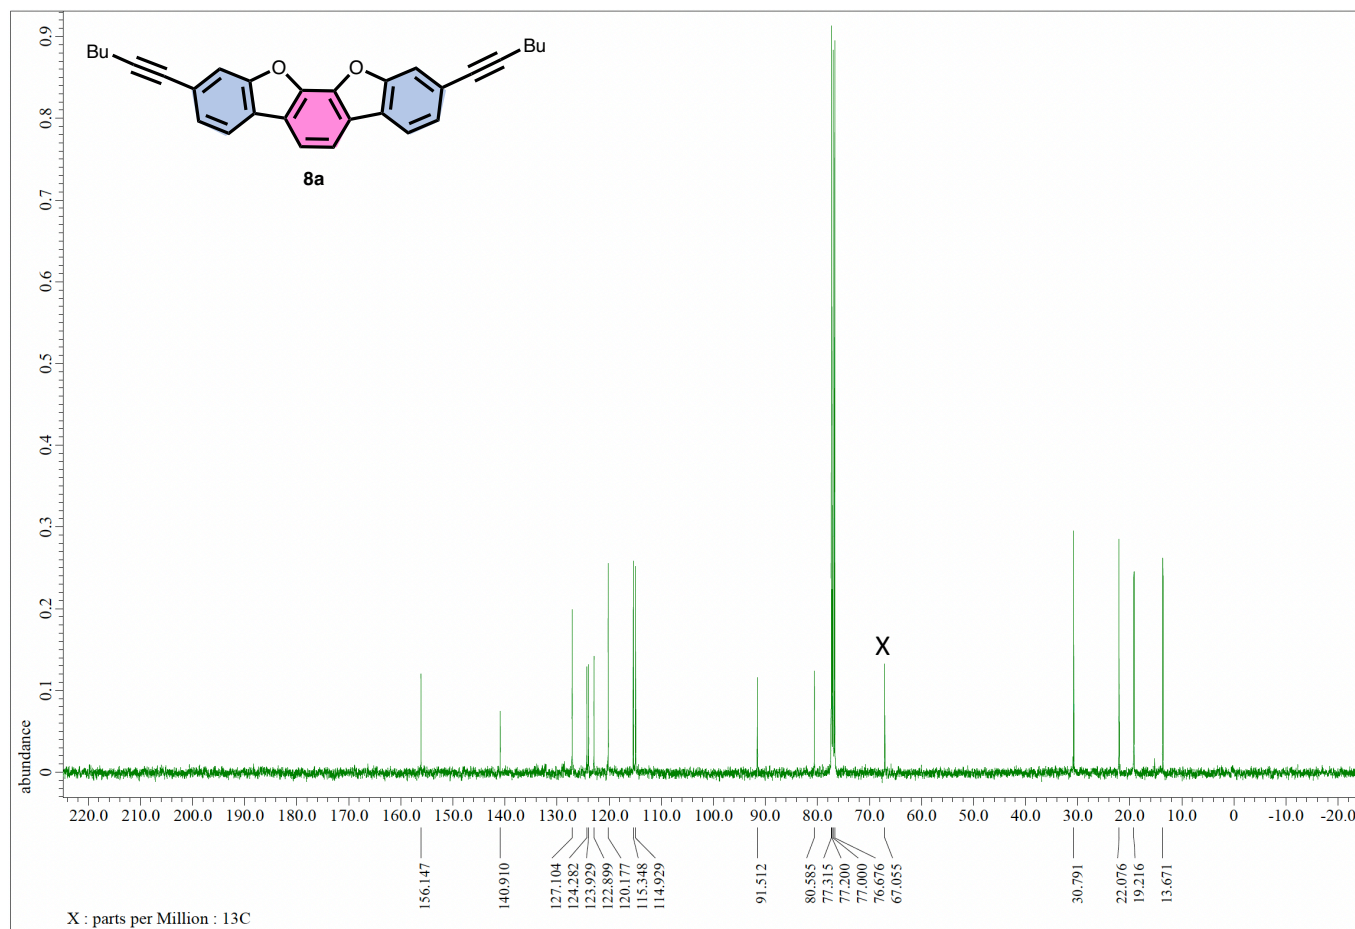

**Figure S14.**  $^{13}\text{C}\{^1\text{H}\}$  NMR Spectrum of 3,8-di(hex-1-yn-1-yl)dibenzo[*d,d'*]benzo[2,1-*b:3,4-b'*]difuran (**8a**) (100 MHz,  $\text{CDCl}_3$ , r.t.). X indicates incorporated 1,4-dioxane.

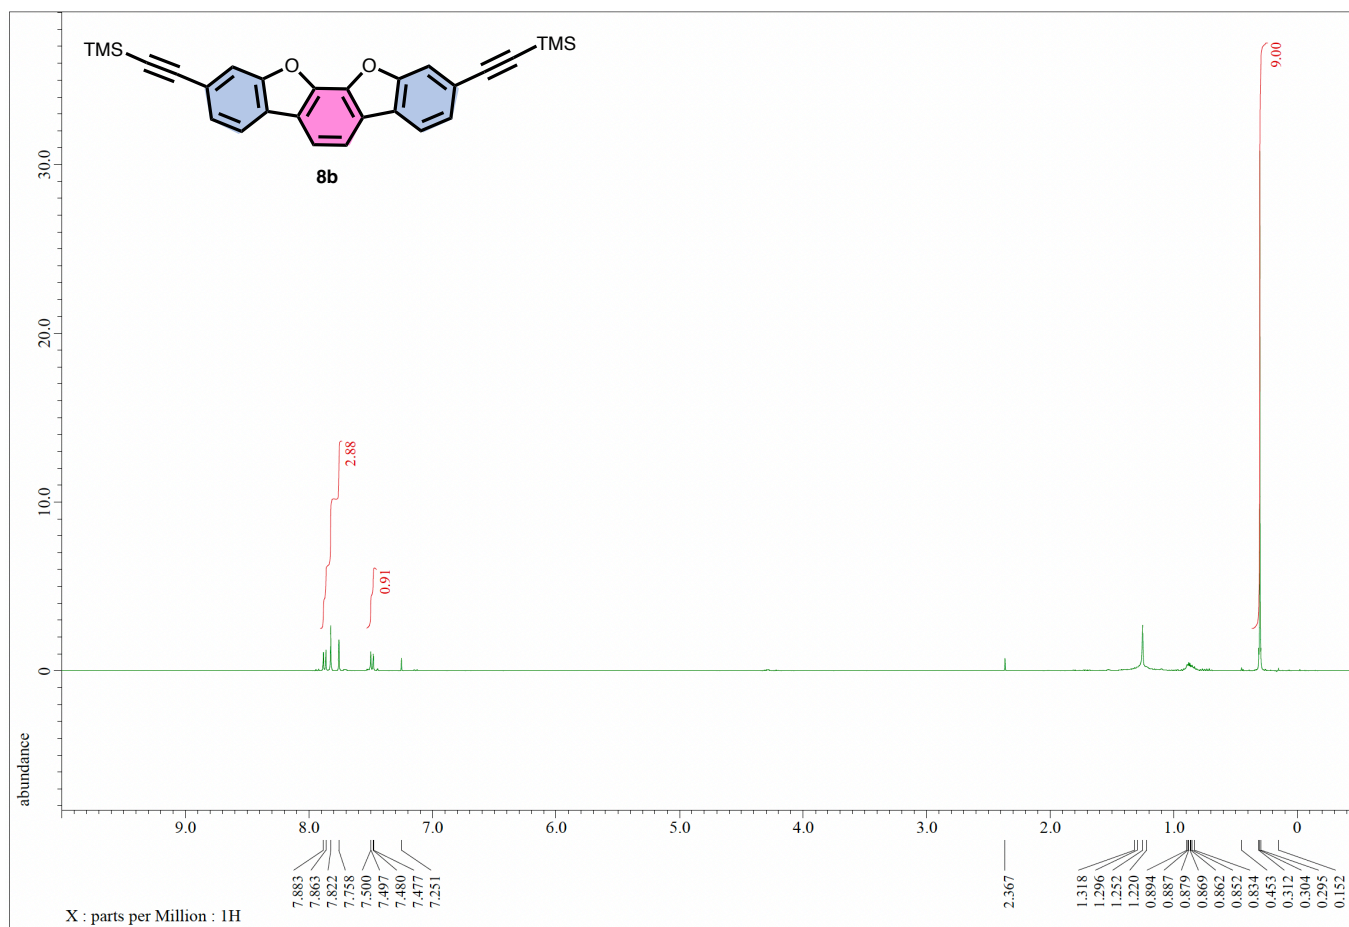

**Figure S15.** <sup>1</sup>H NMR Spectrum of 3,8-bis(trimethylsilyl ethynyl)dibenzo[*d,d'*]benzo[2,1-*b*:3,4-*b'*]difuran (**8b**) (400 MHz, CDCl<sub>3</sub>, r.t.).

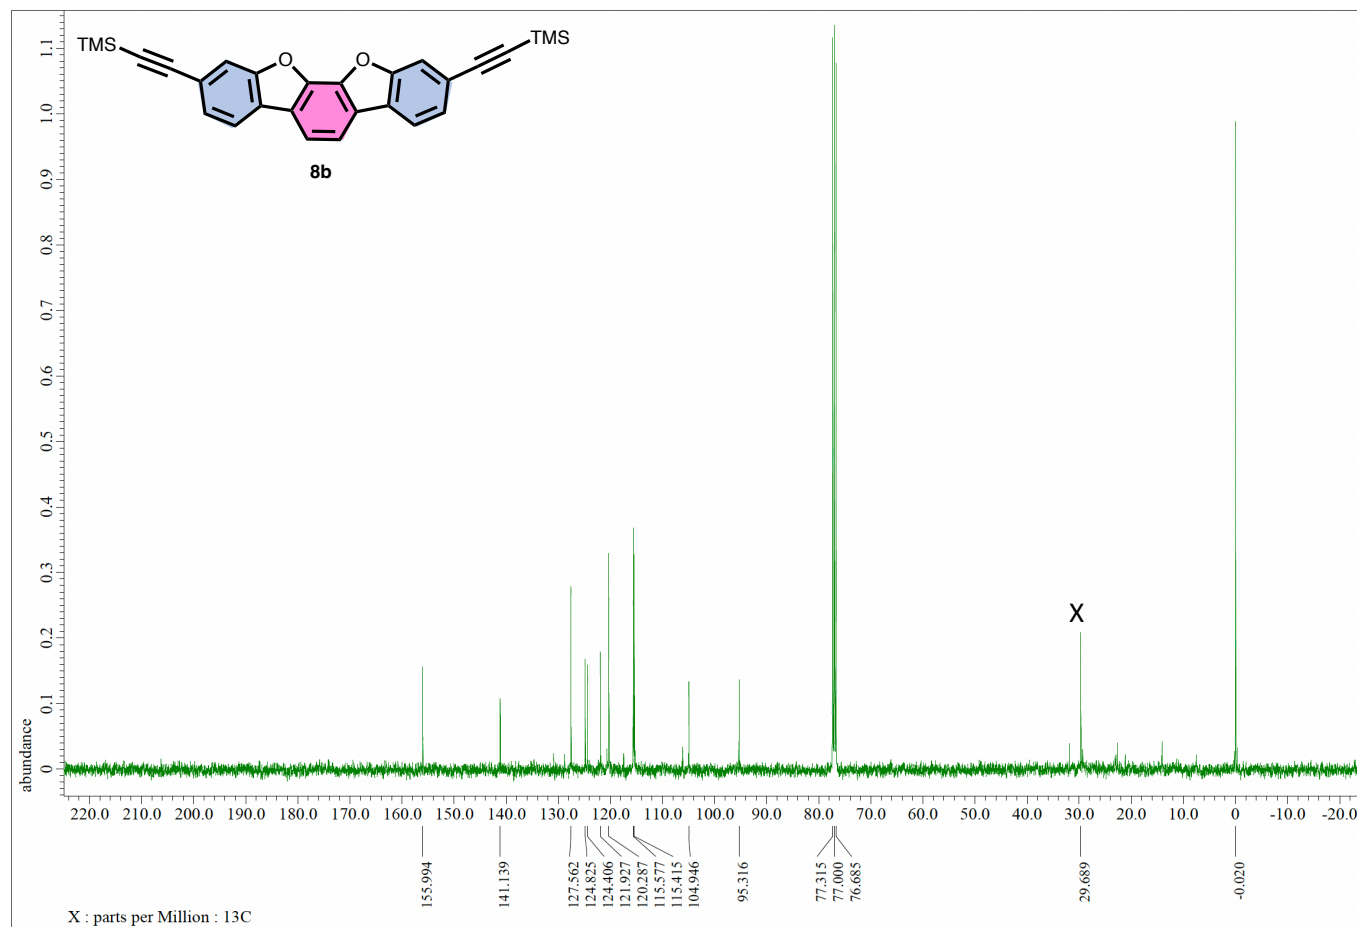

**Figure S16.**  $^{13}\text{C}\{^1\text{H}\}$  NMR Spectrum of 3,8-bis(trimethylsilylethynyl)dibenzo[*d,d'*]benzo[2,1-*b*:3,4-*b'*]difuran (**8b**) (100 MHz,  $\text{CDCl}_3$ , r.t.). X indicates an impurity.

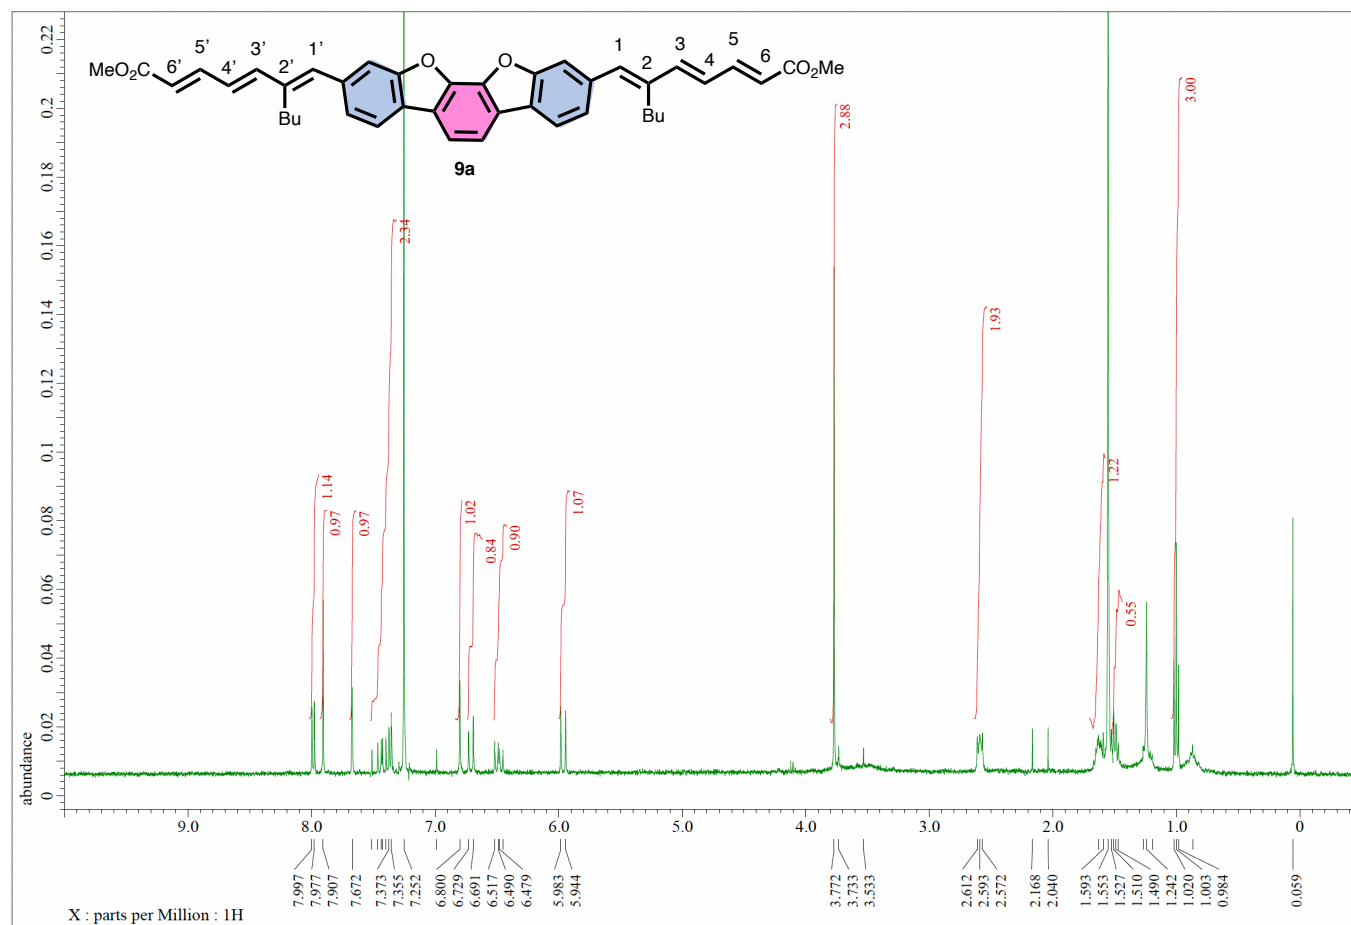

**Figure S17.**  $^1\text{H}$  NMR Spectrum of 3,8-bis((1*E*,3*E*,5*E*)-2-butyl-6-methoxycarbonylhepta-1,3,5-trien-1-yl)dibenzo[*d,d'*]benzo[2,1-*b:3,4-b'*]difuran (**9a**) (400 MHz,  $\text{CDCl}_3$ , r.t.).

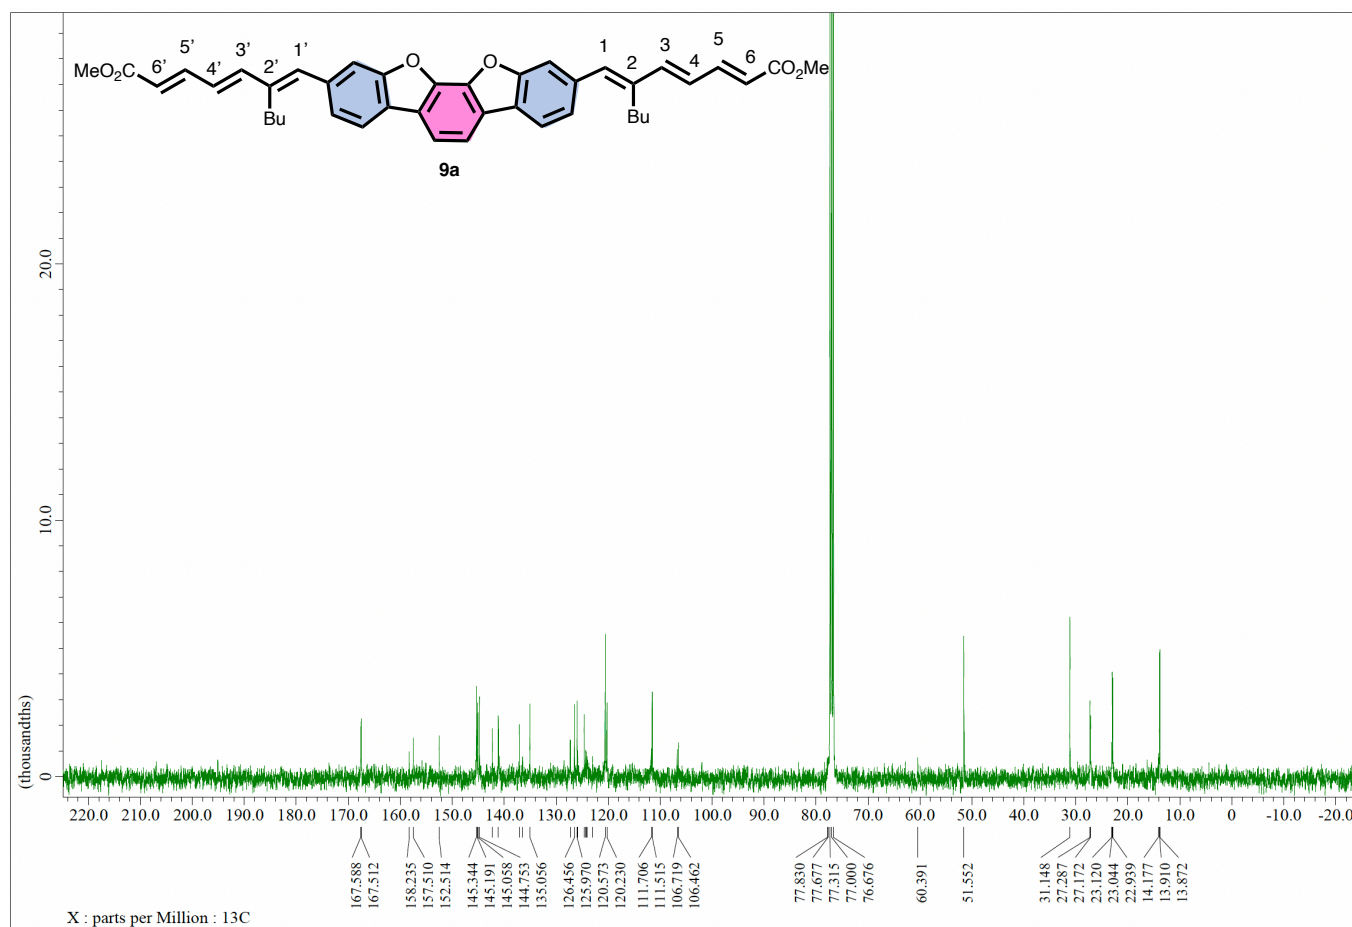

**Figure S18.**  $^{13}\text{C}\{^1\text{H}\}$  NMR Spectrum of 3,8-bis((1*E*,3*E*,5*E*)-2-butyl-6-methoxycarbonylhepta-1,3,5-trien-1-yl)dibenzo[*d,d'*]benzo[2,1-*b*:3,4-*b'*]difuran (**9a**) (100 MHz,  $\text{CDCl}_3$ , r.t.).

## Mass Spectrum SmartFormula Report

## Analysis Info

Analysis Name D:\Data\HiranoLab\OKH0221.d  
Method apci\_pos\_wide\_low\_140605.m  
Sample Name OKH0221  
Comment

Acquisition Date 2/24/2021 6:11:57 PM  
Operator BDAL  
Instrument / Ser# micrOTOF-Q II 10323

## Acquisition Parameter

|             |            |                       |           |                  |           |
|-------------|------------|-----------------------|-----------|------------------|-----------|
| Source Type | APCI       | Ion Polarity          | Positive  | Set Nebulizer    | 1.6 Bar   |
| Focus       | Not active | Set Capillary         | 4500 V    | Set Dry Heater   | 200 °C    |
| Scan Begin  | 100 m/z    | Set End Plate Offset  | -500 V    | Set Dry Gas      | 3.0 l/min |
| Scan End    | 2000 m/z   | Set Collision Cell RF | 150.0 Vpp | Set Divert Valve | Waste     |

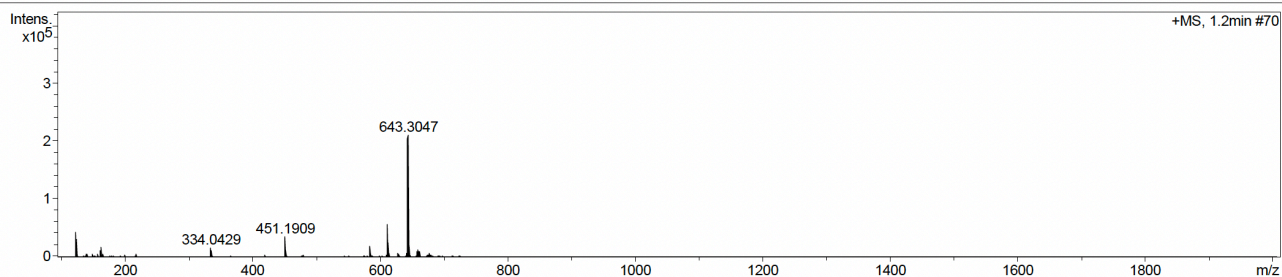

| Meas. m/z | # | Formula       | Score  | m/z      | err [mDa] | err [ppm] | mSigma | rdb  | e <sup>-</sup> Conf | N-Rule |
|-----------|---|---------------|--------|----------|-----------|-----------|--------|------|---------------------|--------|
| 643.3047  | 1 | C 42 H 43 O 6 | 100.00 | 643.3054 | 0.7       | 1.1       | 23.9   | 21.5 | even                | ok     |

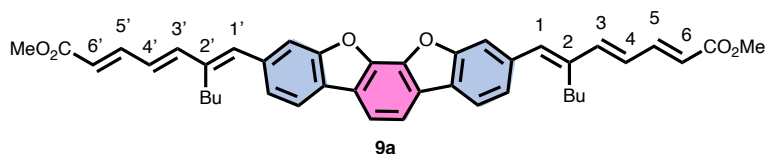

**Figure S19.** High resolution mass spectrum (APCI) of 3,8-bis((1*E*,3*E*,5*E*)-2-butyl-6-methoxycarbonylhepta-1,3,5-trien-1-yl)dibenzo[*d,d'*]benzo[2,1-*b*:3,4-*b'*]difuran (**9a**).



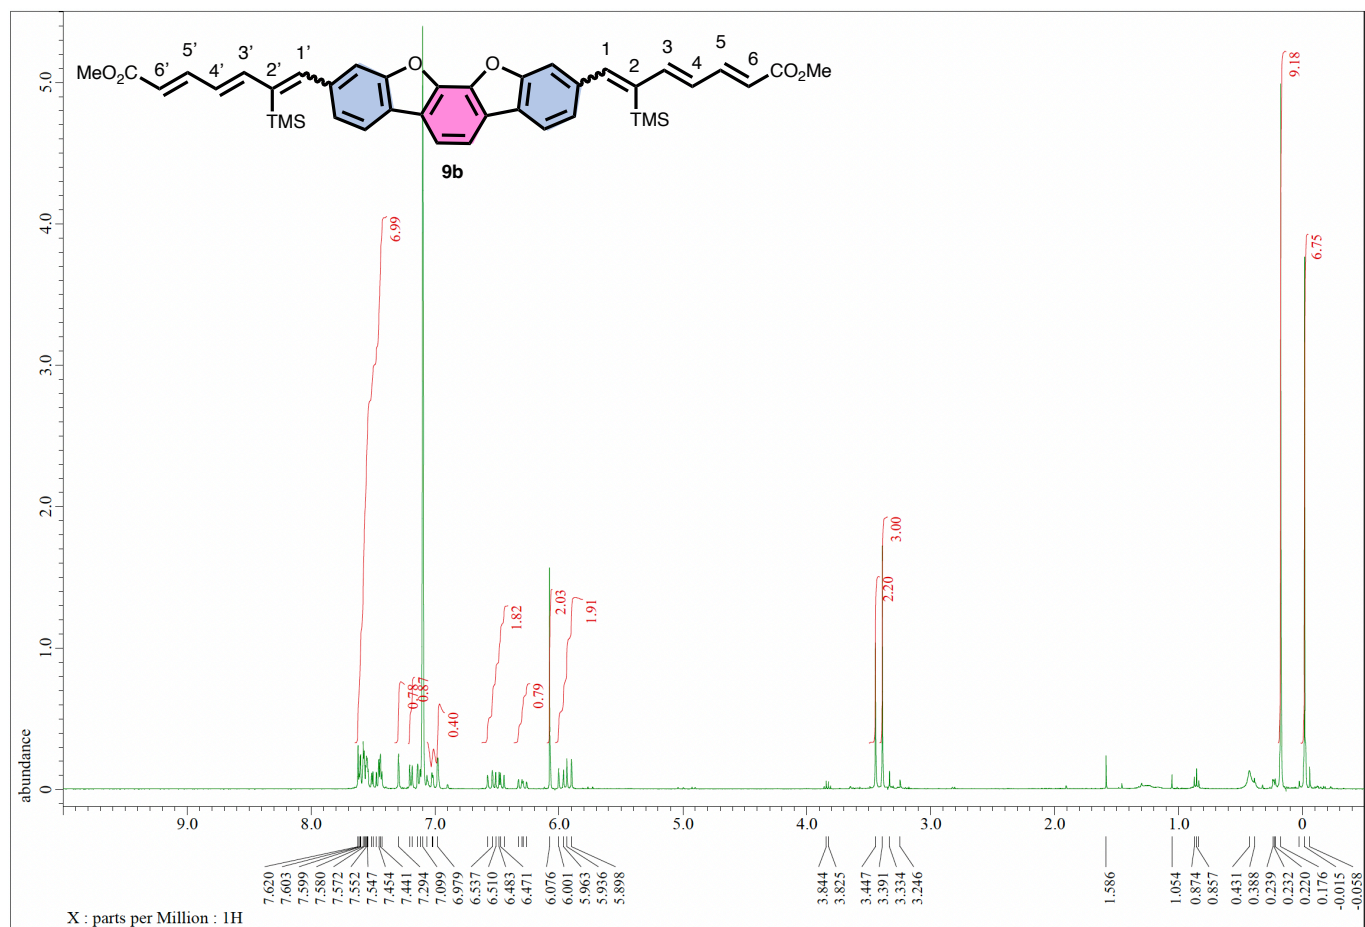

**Figure S20.** <sup>1</sup>H NMR Spectrum of 3,8-bis(6-methoxycarbonyl-2-trimethylsilylhepta-1,3,5-trien-1-yl)dibenzo[*d,d'*]benzo[2,1-*b:3,4-b'*]difuran (**9b**) (400 MHz, CDCl<sub>3</sub>, r.t.). This compound contained (1*E*,3*E*,5*E*)-**9b** and (1*Z*,3*E*,5*E*)-**9b**.

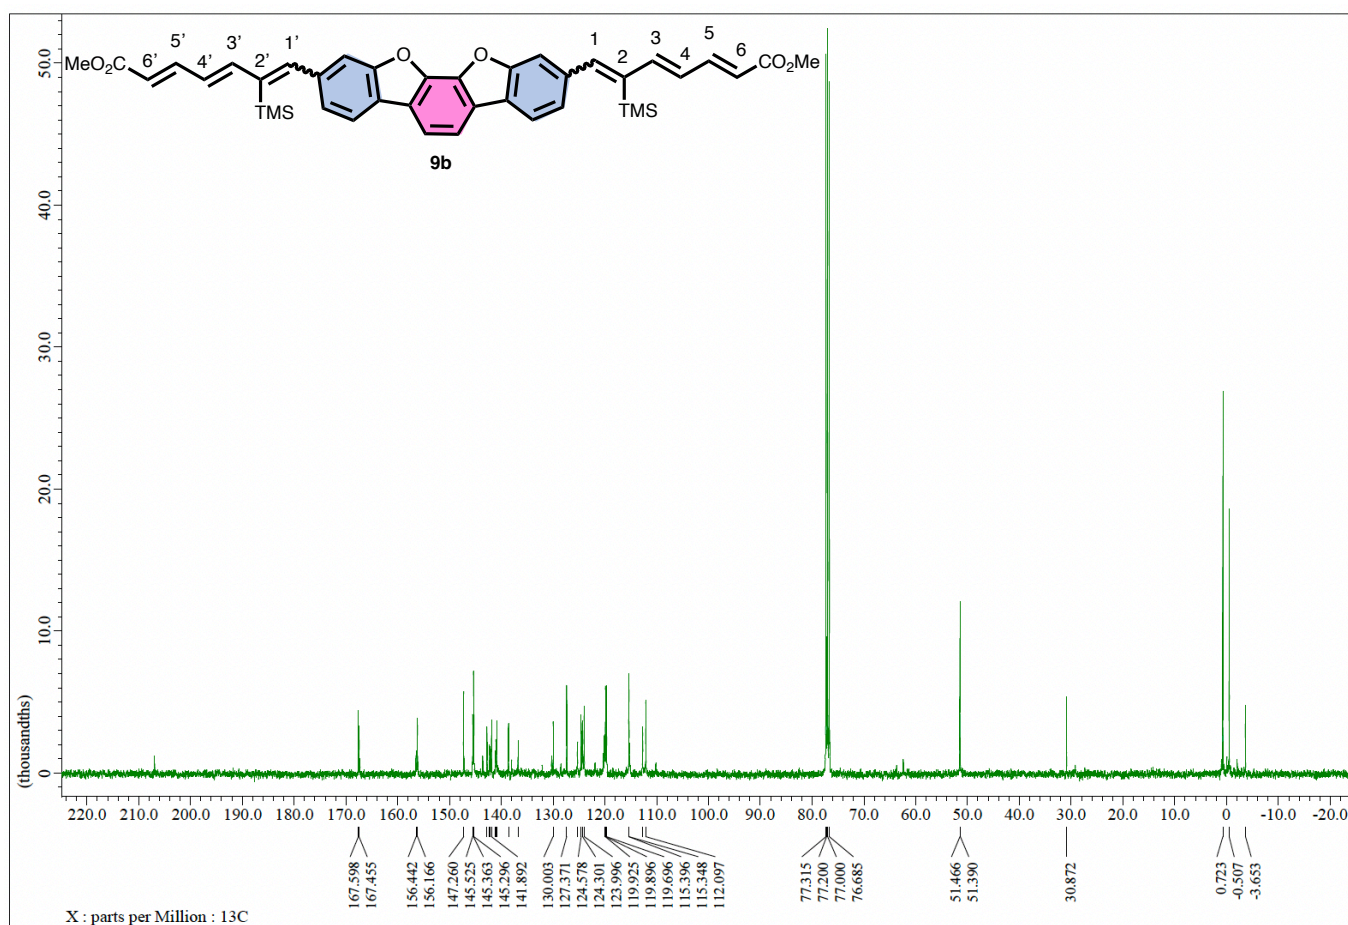

**Figure S21.**  $^{13}\text{C}\{^1\text{H}\}$  NMR Spectrum of 3,8-bis(6-methoxycarbonyl-2-trimethylsilylhepta-1,3,5-trien-1-yl)dibenzo[*d,d'*]benzo[2,1-*b:3,4-b'*]difuran (**9b**) (100 MHz,  $\text{CDCl}_3$ , r.t.).



## Mass Spectrum SmartFormula Report

## Analysis Info

Analysis Name D:\Data\HiranoLab\OKH0583.d  
Method apci\_pos\_wide\_low\_140605.m  
Sample Name OKH0583  
Comment

Acquisition Date 2/24/2021 7:10:11 PM  
Operator BDAL  
Instrument / Ser# micrOTOF-Q II 10323

## Acquisition Parameter

|             |            |                       |           |                  |           |
|-------------|------------|-----------------------|-----------|------------------|-----------|
| Source Type | APCI       | Ion Polarity          | Positive  | Set Nebulizer    | 1.6 Bar   |
| Focus       | Not active | Set Capillary         | 4500 V    | Set Dry Heater   | 200 °C    |
| Scan Begin  | 100 m/z    | Set End Plate Offset  | -500 V    | Set Dry Gas      | 3.0 l/min |
| Scan End    | 2000 m/z   | Set Collision Cell RF | 150.0 Vpp | Set Divert Valve | Waste     |

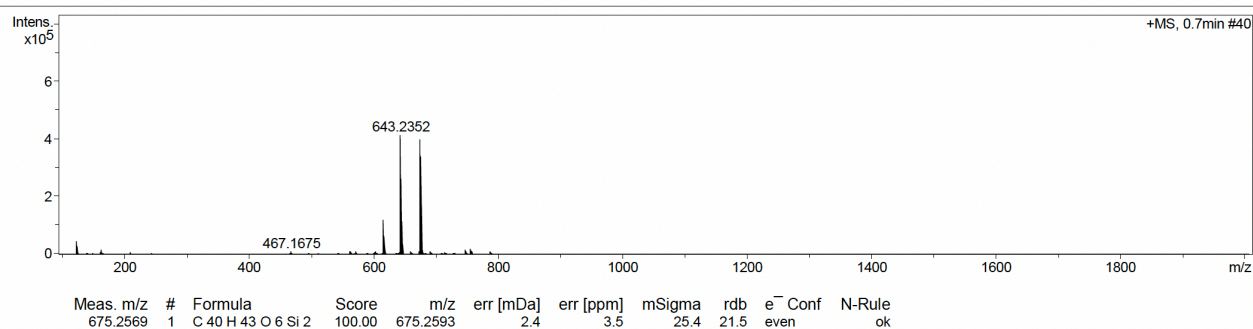

## Window Display Report

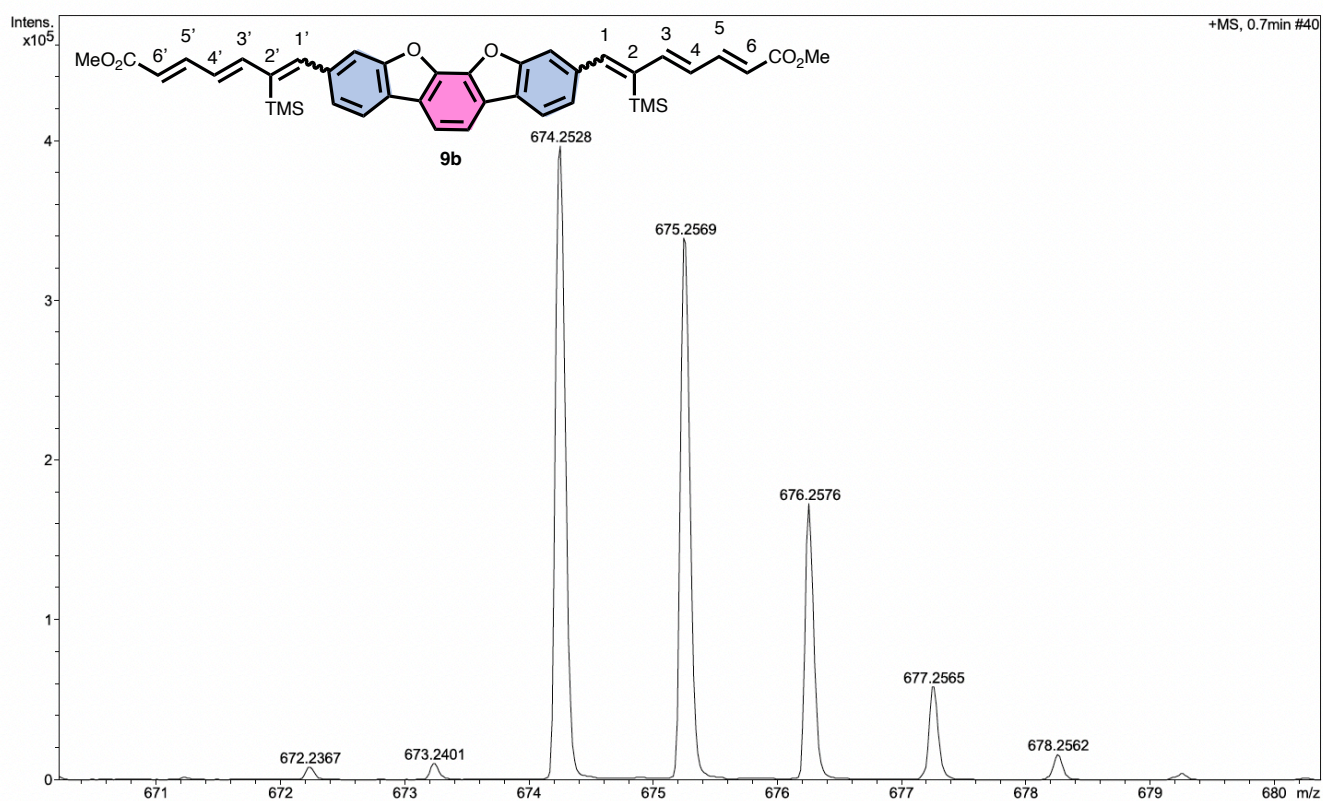

**Figure S22.** High resolution mass spectrum (APCI) of 3,8-bis(6-methoxycarbonyl-2-trimethylsilylhepta-1,3,5-trien-1-yl)dibenzo[*d,d'*]benzo[2,1-*b:3,4-b'*]difuran (**9b**).

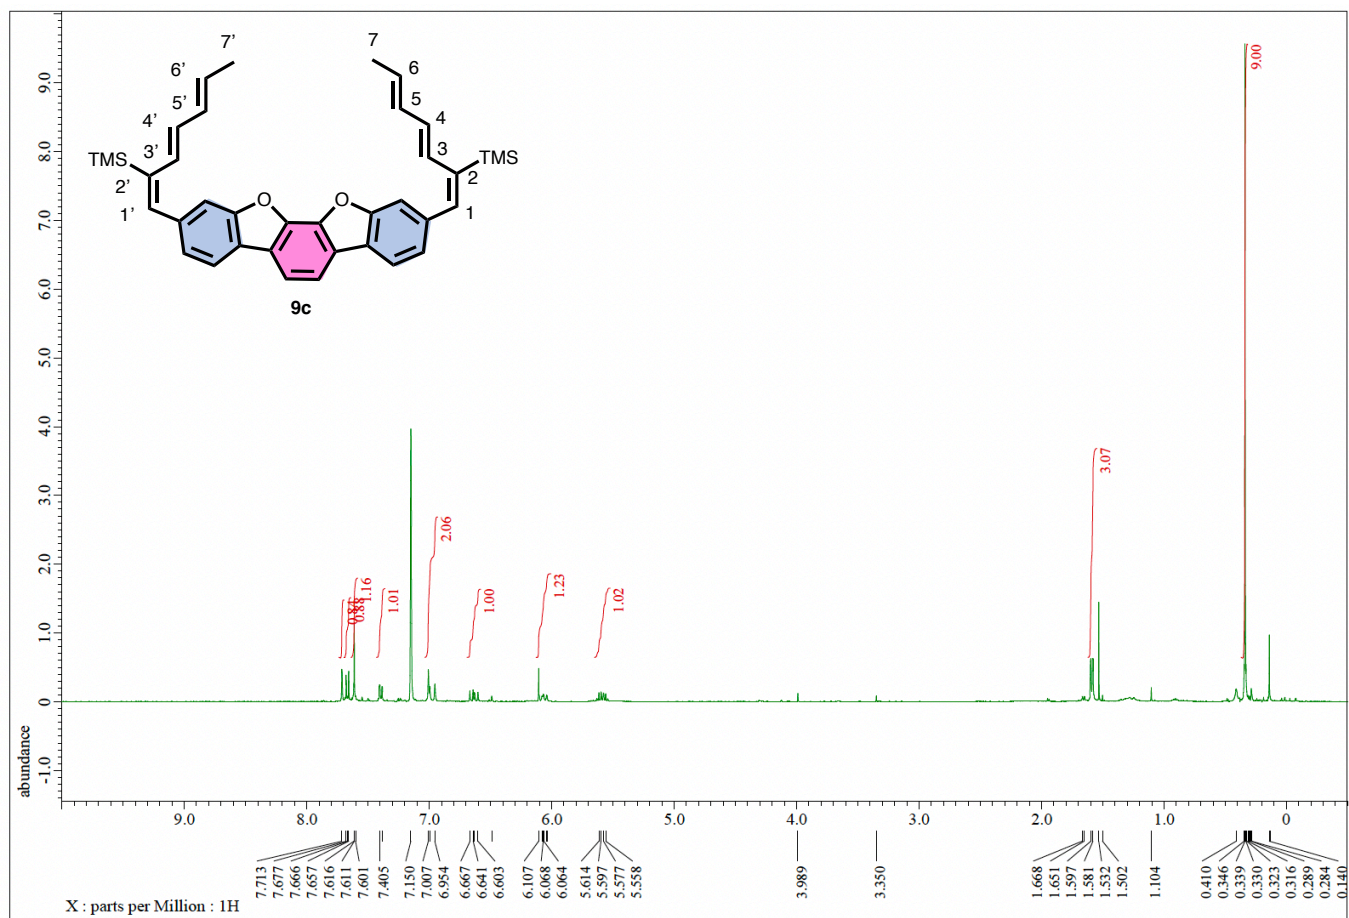

**Figure S23.**  $^1\text{H}$  NMR Spectrum of 3,8-bis((1*E*,3*E*,5*E*)-2-trimethylsilylhepta-1,3,5-trien-1-yl)dibenzo[*d,d'*]benzo[2,1-*b*:3,4-*b'*]difuran (**9c**) (400 MHz,  $\text{C}_6\text{D}_6$ , r.t.).

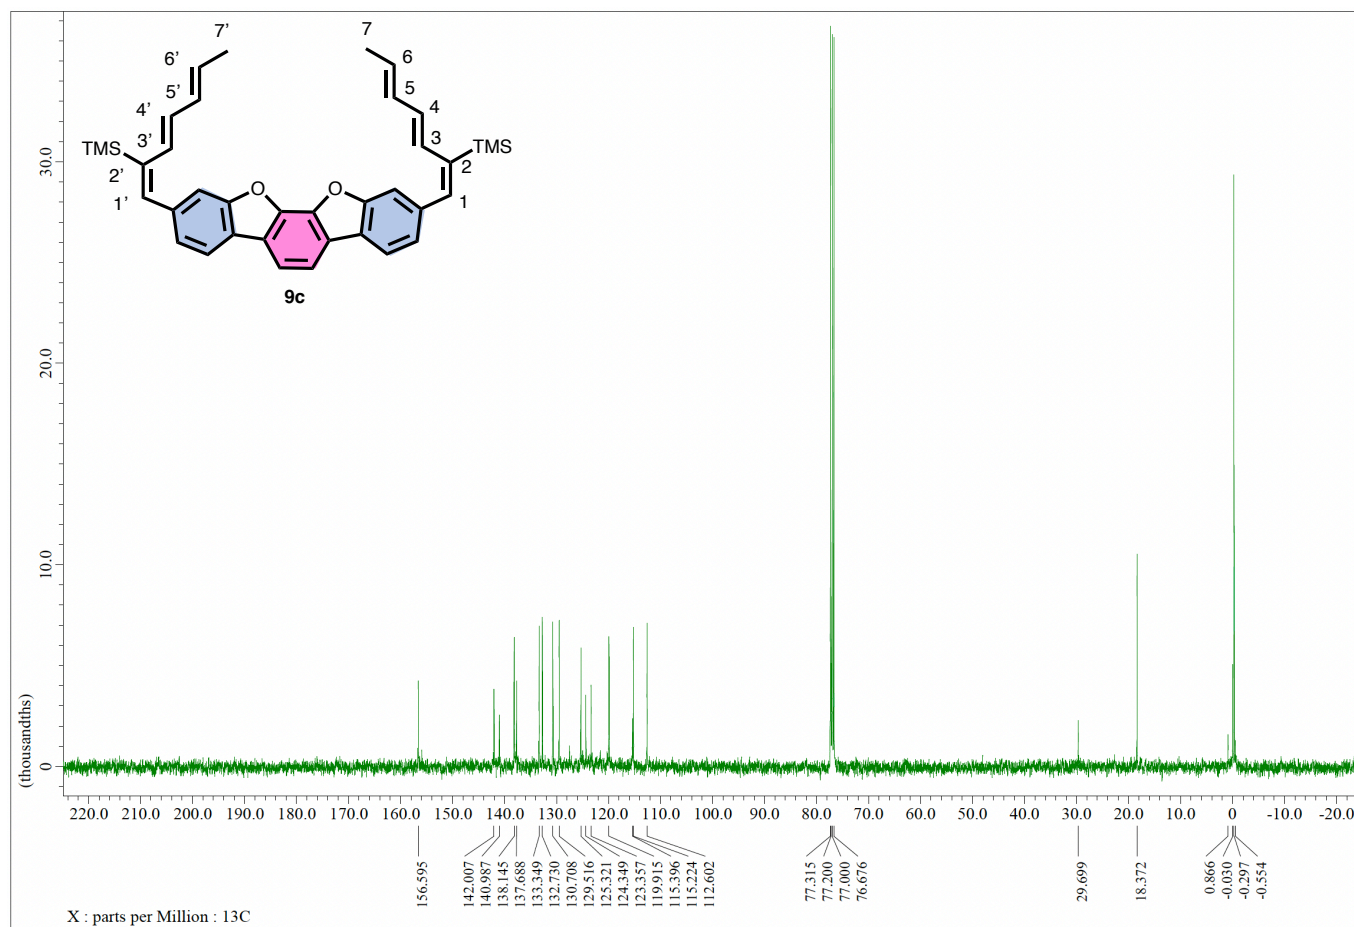

**Figure S24.**  $^{13}\text{C}\{^1\text{H}\}$  NMR Spectrum of 3,8-bis{(1*E*,3*E*,5*E*)-2-trimethylsilylhepta-1,3,5-trien-1-yl}dibenzo[*d,d'*]benzo[2,1-*b:3,4-*b'**]difuran (**9c**) (100 MHz,  $\text{CDCl}_3$ , r.t.).

## Mass Spectrum SmartFormula Report

## Analysis Info

Analysis Name D:\Data\HiranoLab\OKH0711.d  
 Method apci\_pos\_wide\_low\_140605.m  
 Sample Name OKH0711  
 Comment

Acquisition Date 2/24/2021 6:34:49 PM  
 Operator BDAL  
 Instrument / Ser# micrOTOF-Q II 10323

## Acquisition Parameter

|             |            |                       |           |                  |           |
|-------------|------------|-----------------------|-----------|------------------|-----------|
| Source Type | APCI       | Ion Polarity          | Positive  | Set Nebulizer    | 1.6 Bar   |
| Focus       | Not active | Set Capillary         | 4500 V    | Set Dry Heater   | 200 °C    |
| Scan Begin  | 100 m/z    | Set End Plate Offset  | -500 V    | Set Dry Gas      | 3.0 l/min |
| Scan End    | 2000 m/z   | Set Collision Cell RF | 150.0 Vpp | Set Divert Valve | Waste     |

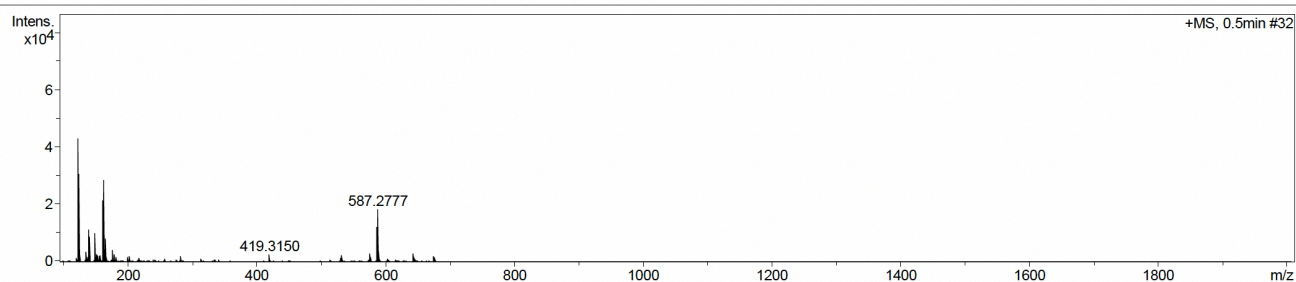

| Meas. m/z | # | Formula                                                        | Score  | m/z      | err [mDa] | err [ppm] | mSigma | rdb  | e <sup>-</sup> Conf | N-Rule |
|-----------|---|----------------------------------------------------------------|--------|----------|-----------|-----------|--------|------|---------------------|--------|
| 587.2777  | 1 | C <sub>38</sub> H <sub>43</sub> O <sub>2</sub> Si <sub>2</sub> | 85.33  | 587.2796 | 1.9       | 3.2       | 15.7   | 19.5 | even                | ok     |
|           | 2 | C <sub>42</sub> H <sub>39</sub> O <sub>2</sub> Si              | 100.00 | 587.2765 | -1.2      | -2.1      | 28.3   | 24.5 | even                | ok     |

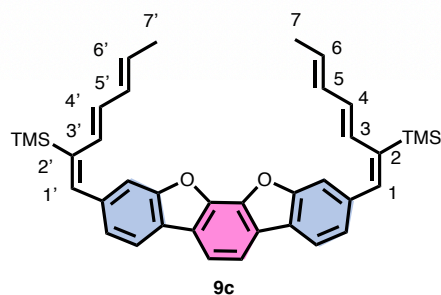

**Figure S25.** High resolution mass spectrum (APCI) of 3,8-bis{(1*E*,3*E*,5*E*)-2-trimethylsilylhepta-1,3,5-trien-1-yl}dibenzo[*d,d'*]benzo[2,1-*b*:3,4-*b'*]difuran (**9c**).

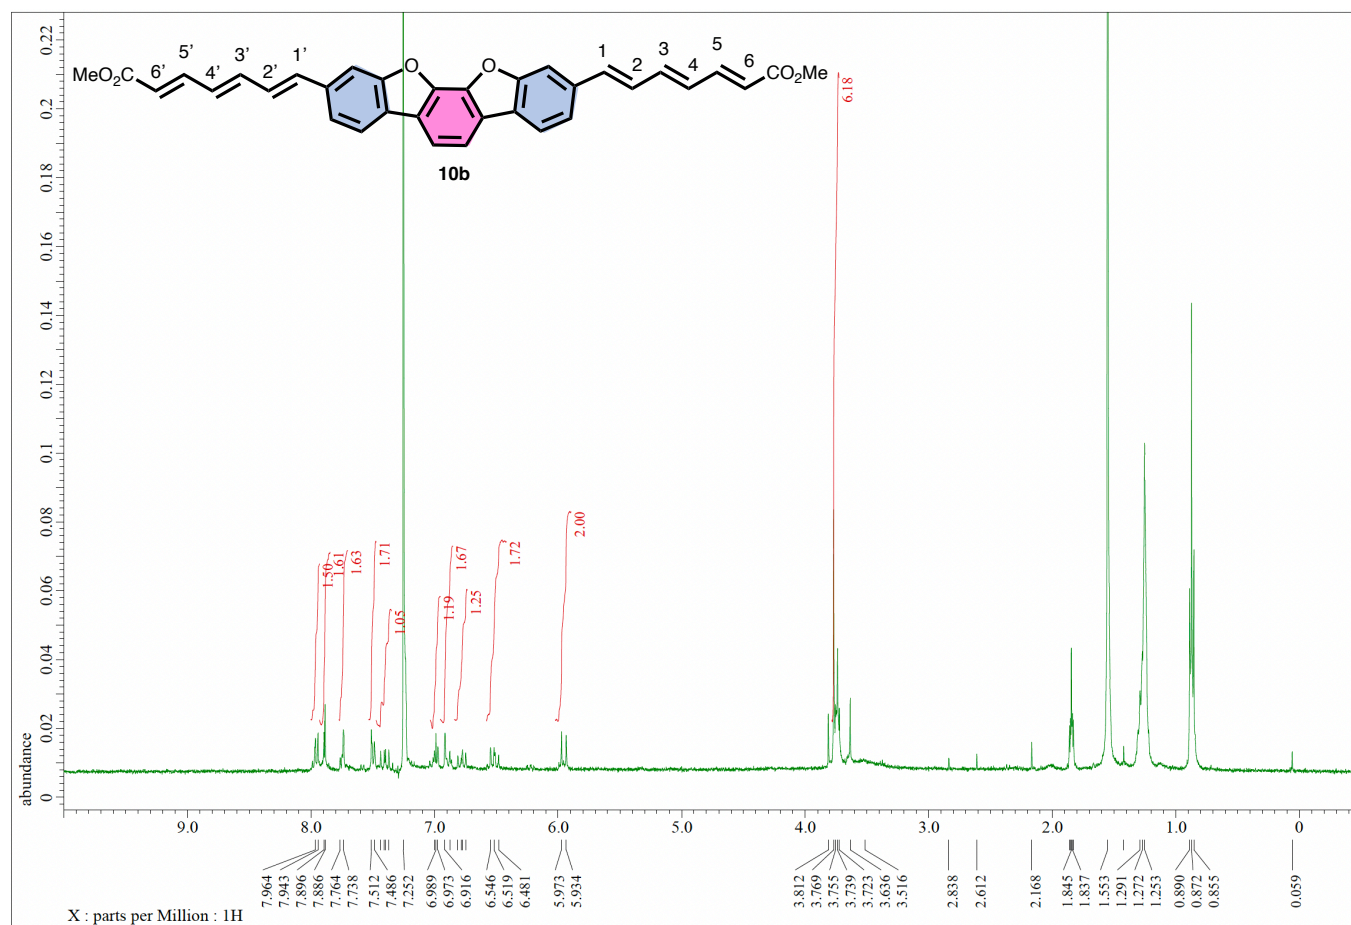

**Figure S26.**  $^1\text{H}$  NMR Spectrum of 3,8-bis{(1*E*,3*E*,5*E*)-6-methoxycarbonylhepta-1,3,5-trien-1-yl}dibenzo[*d,d'*]benzo[2,1-*b*:3,4-*b'*]difuran (**10b**) (400 MHz,  $\text{CDCl}_3$ , r.t.).



## Mass Spectrum SmartFormula Report

## Analysis Info

Analysis Name D:\Data\HiranoLab\OKH0339.d  
 Method apci\_pos\_wide\_low\_140605.m  
 Sample Name OKH0339  
 Comment

Acquisition Date 2/24/2021 6:27:04 PM  
 Operator BDAL  
 Instrument / Ser# micrOTOF-Q II 10323

## Acquisition Parameter

| Source Type | APCI       | Ion Polarity          | Positive  | Set Nebulizer    | 1.6 Bar   |
|-------------|------------|-----------------------|-----------|------------------|-----------|
| Focus       | Not active | Set Capillary         | 4500 V    | Set Dry Heater   | 200 °C    |
| Scan Begin  | 100 m/z    | Set End Plate Offset  | -500 V    | Set Dry Gas      | 3.0 l/min |
| Scan End    | 2000 m/z   | Set Collision Cell RF | 150.0 Vpp | Set Divert Valve | Waste     |

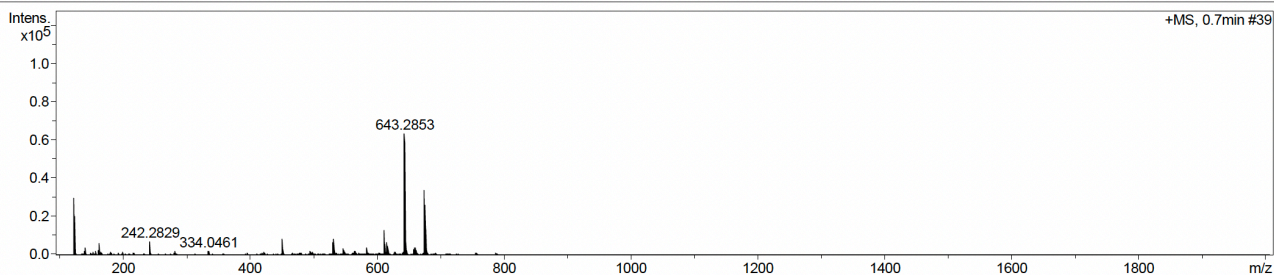

| Meas. m/z | # | Formula           | Score  | m/z      | err [mDa] | err [ppm] | mSigma | rdb  | e <sup>-</sup> Conf | N-Rule |
|-----------|---|-------------------|--------|----------|-----------|-----------|--------|------|---------------------|--------|
| 531.1777  | 1 | C 34 H 27 O 6     | 100.00 | 531.1802 | 2.5       | 4.7       | 50.4   | 21.5 | even                | ok     |
|           | 2 | C 35 H 23 N 4 O 2 | 22.92  | 531.1816 | 3.8       | 7.2       | 54.6   | 26.5 | even                | ok     |
|           | 3 | C 41 H 23 O       | 25.43  | 531.1743 | -3.4      | -6.4      | 65.6   | 30.5 | even                | ok     |

## Window Display Report

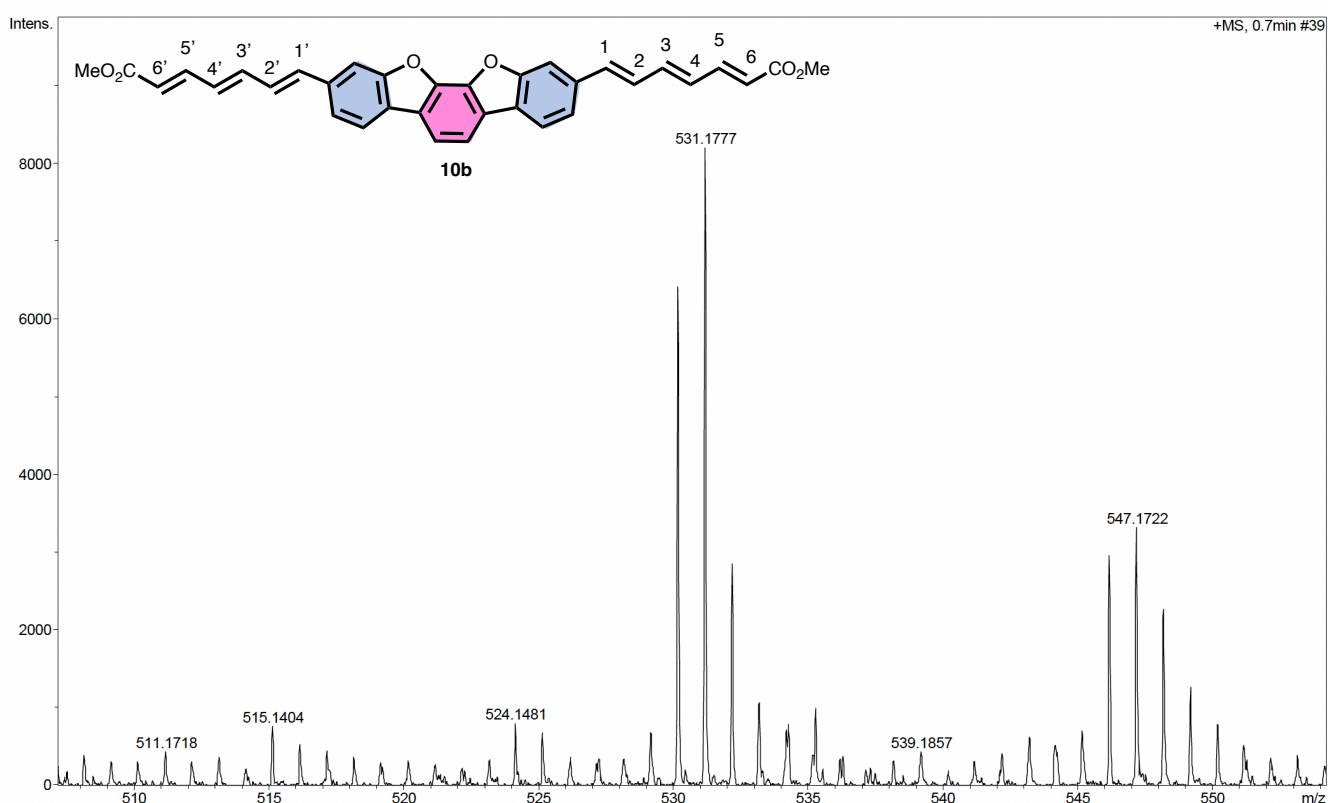

**Figure S27.** High resolution mass spectrum (APCI) of 3,8-bis{(1*E*,3*E*,5*E*)-6-methoxycarbonylhepta-1,3,5-trien-1-yl}dibenzo[*d,d'*]benzo[2,1-*b*:3,4-*b'*]difuran (**10b**).

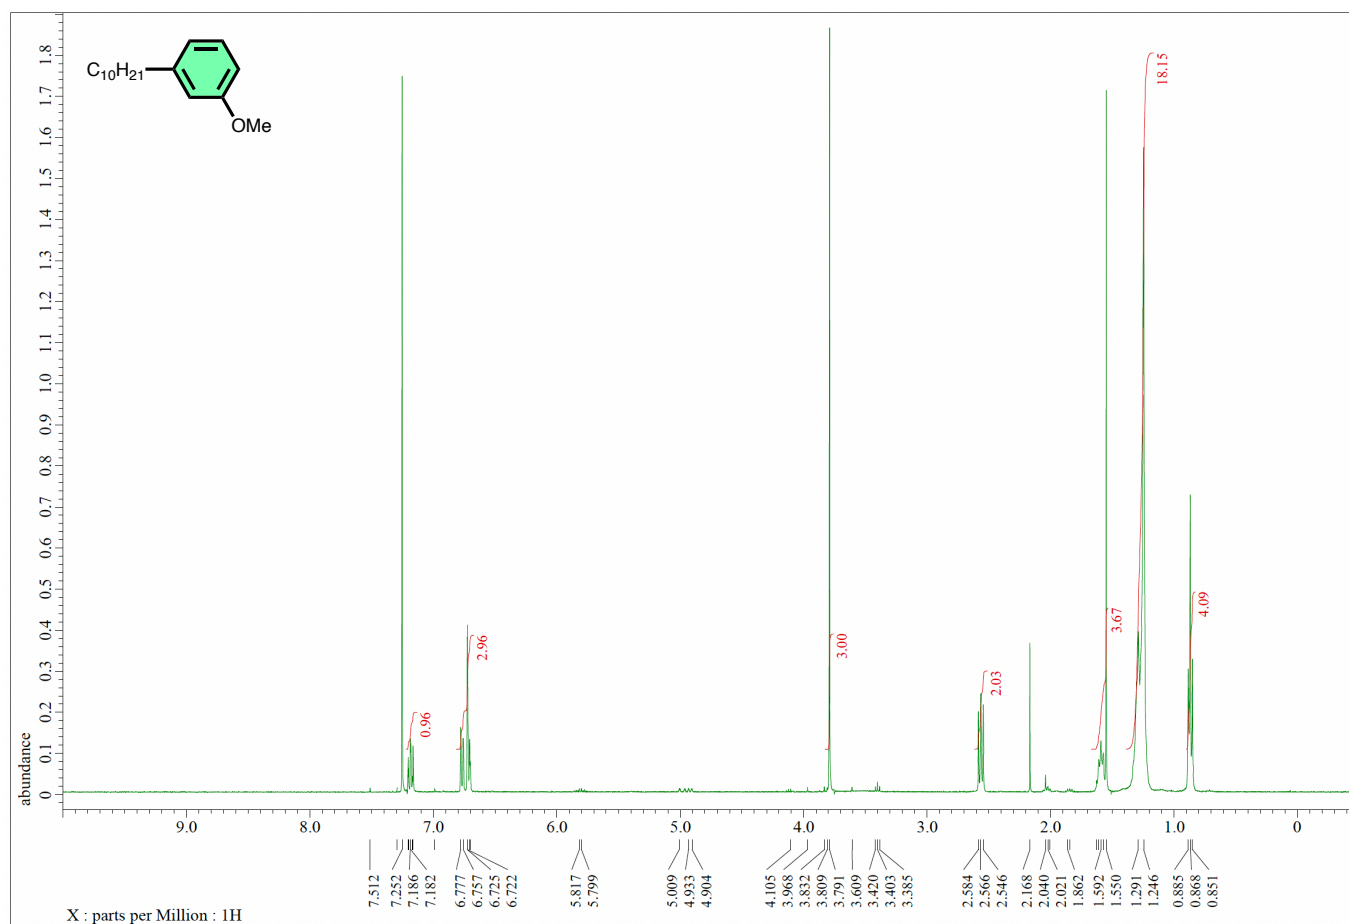

Figure S28.  $^1\text{H}$  NMR Spectrum of 3-decylanisole (400 MHz,  $\text{CDCl}_3$ , r.t.).

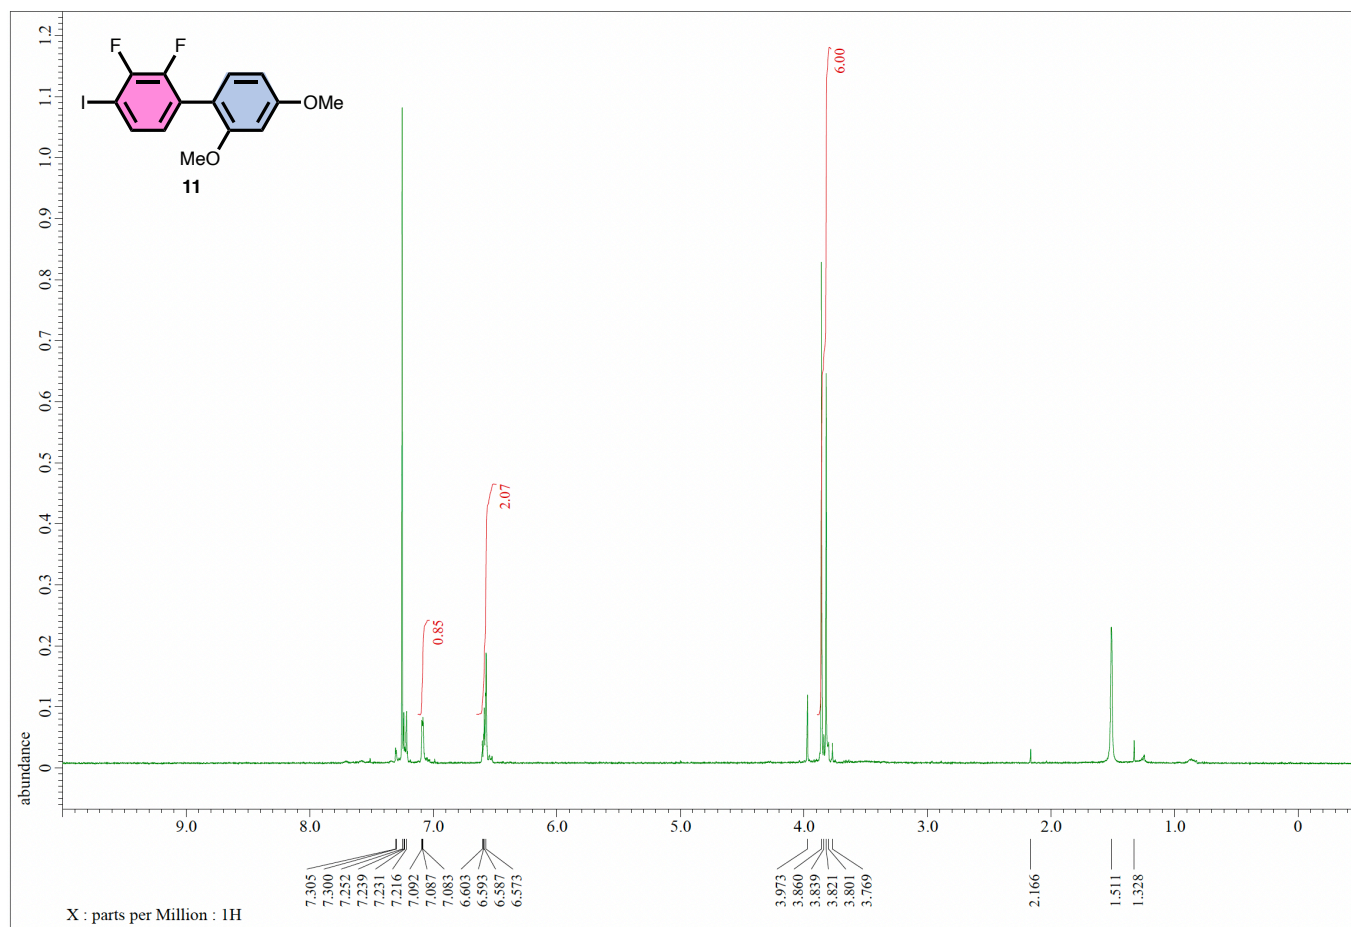

**Figure S29.** <sup>1</sup>H NMR Spectrum of 2,3-difluoro-4-iodo-2',4'-dimethoxy-1,1'-biphenyl (**11**) (400 MHz, CDCl<sub>3</sub>, r.t.).



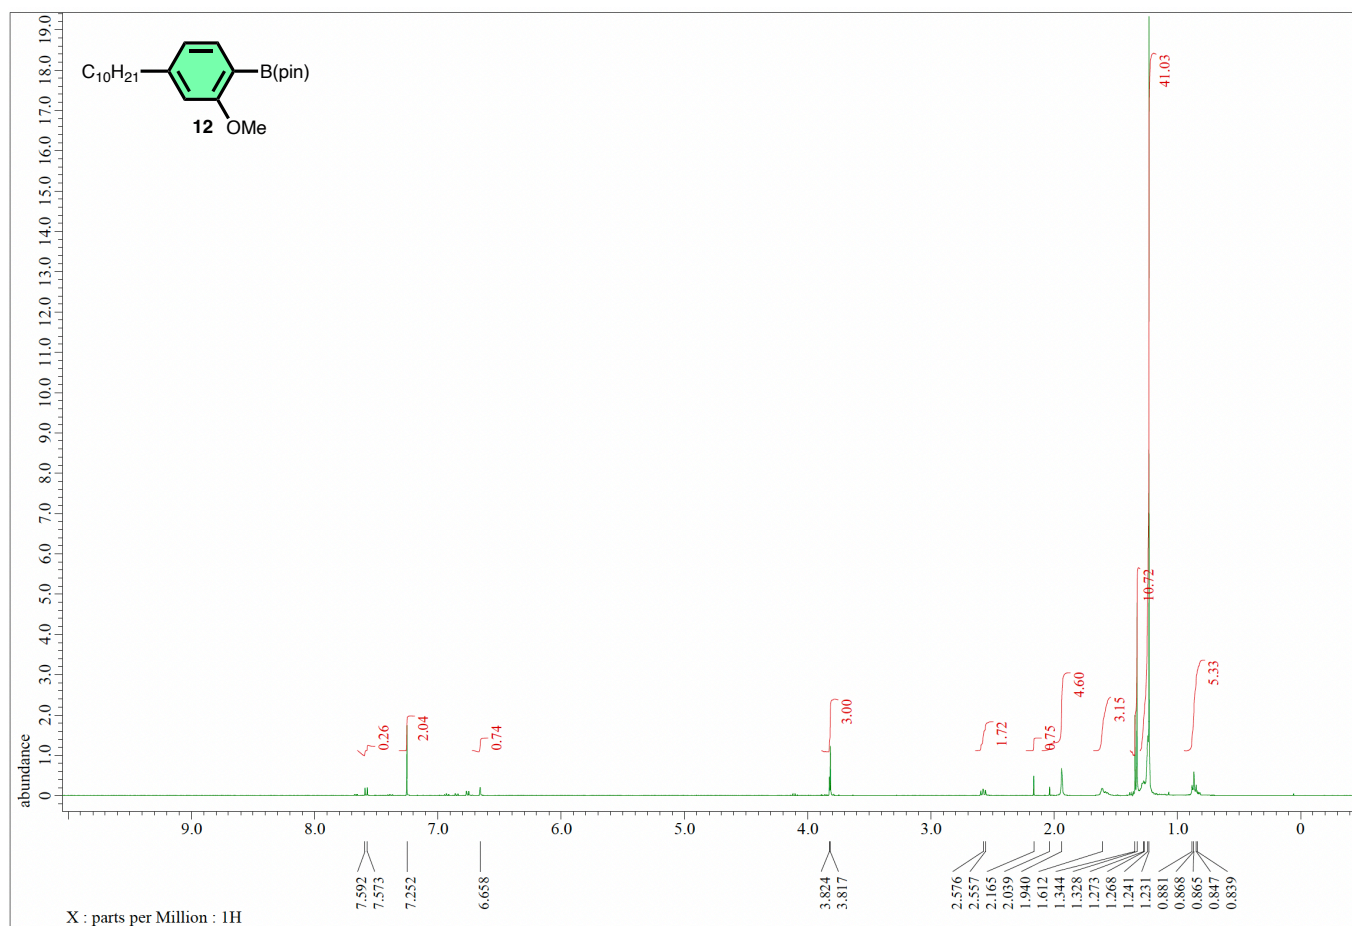

**Figure S30.**  $^1\text{H}$  NMR Spectrum of 2-(4-decyl-2-methoxyphenyl)-4,4-5,5-tetramethyl-1,3,2-dioxaborolane (**12**) (400 MHz,  $\text{CDCl}_3$ , r.t.).

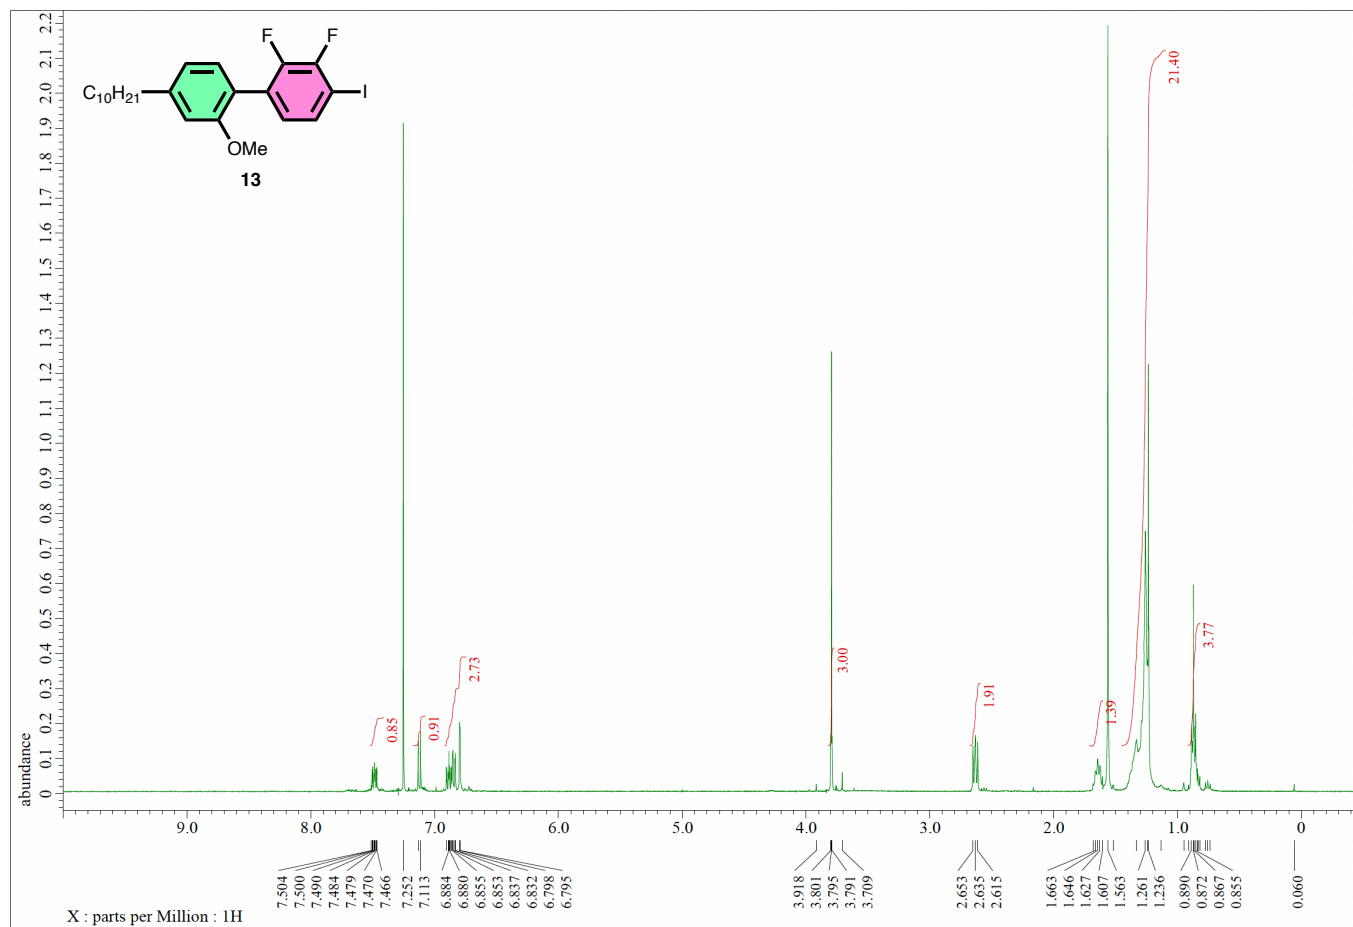

**Figure S31.** <sup>1</sup>H NMR Spectrum of 4-decyl-2,3-difluoro-4-iodo-2'-methoxy-1,1'-biphenyl (**13**) (400 MHz, CDCl<sub>3</sub>, r.t.).

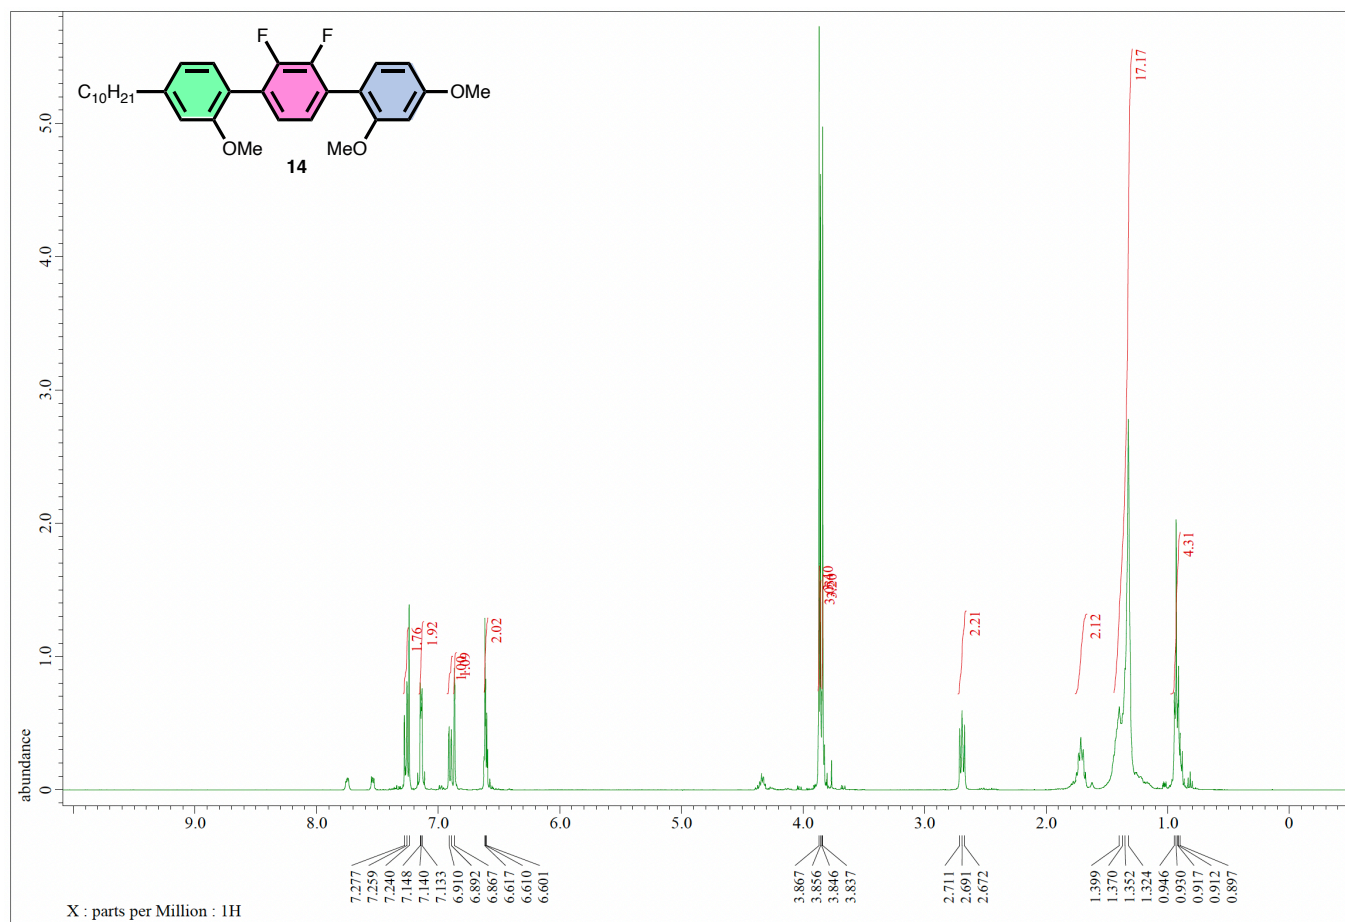

**Figure S32.**  $^1\text{H}$  NMR Spectrum of 4-decyl-2',3'-difluoro-2,2'',4''-trimethoxy-1,1':4',1''-terphenyl (**14**) (400 MHz,  $\text{CDCl}_3$ , r.t.).

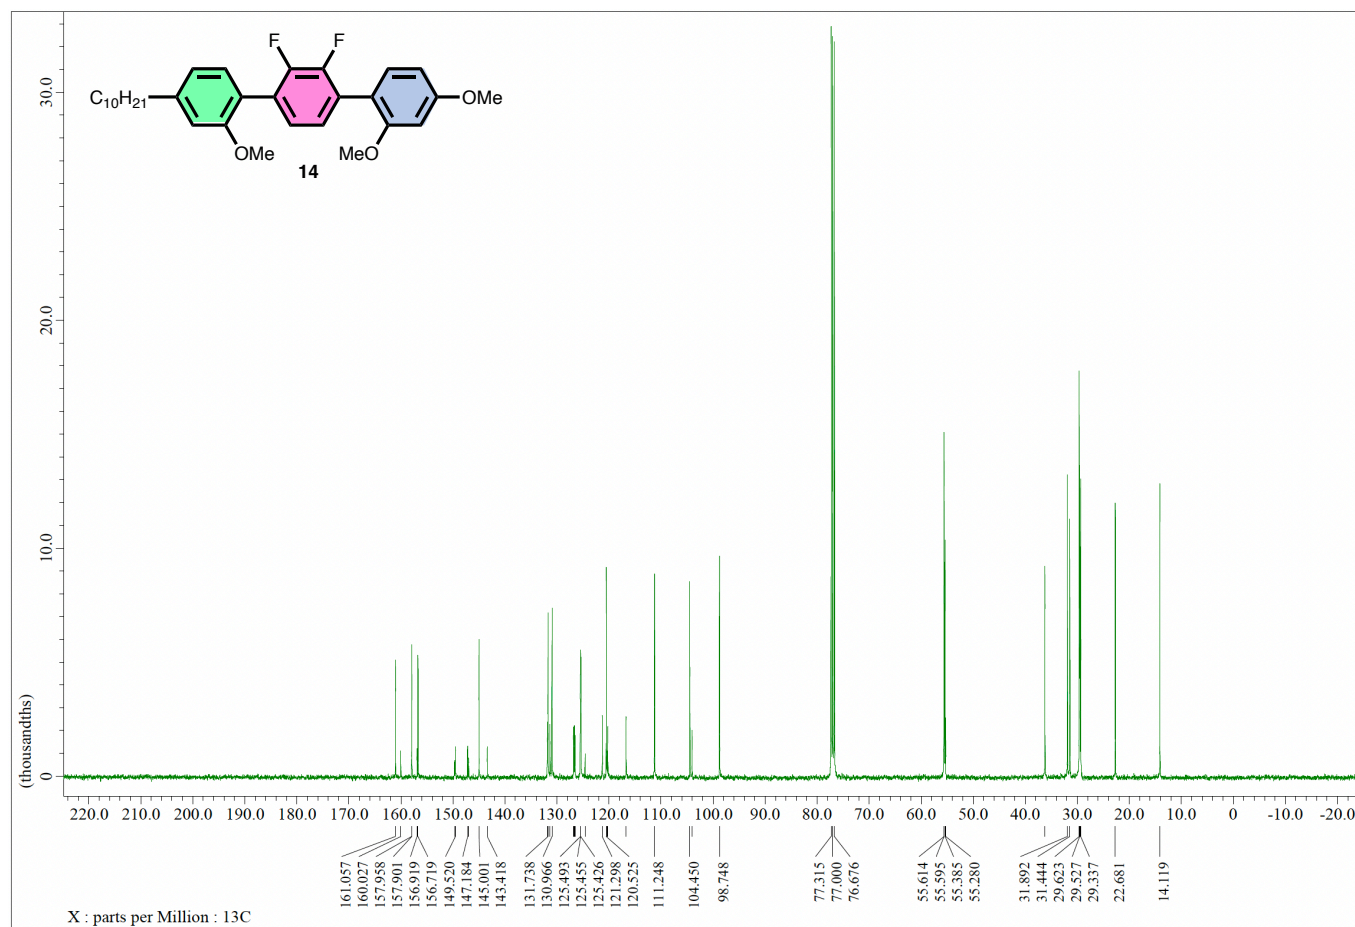

**Figure S33.**  $^{13}\text{C}\{^1\text{H}\}$  NMR Spectrum of 4-decyl-2',3'-difluoro-2,2'',4''-trimethoxy-1,1':4',1''-terphenyl (**14**) (100 MHz,  $\text{CDCl}_3$ , r.t.).

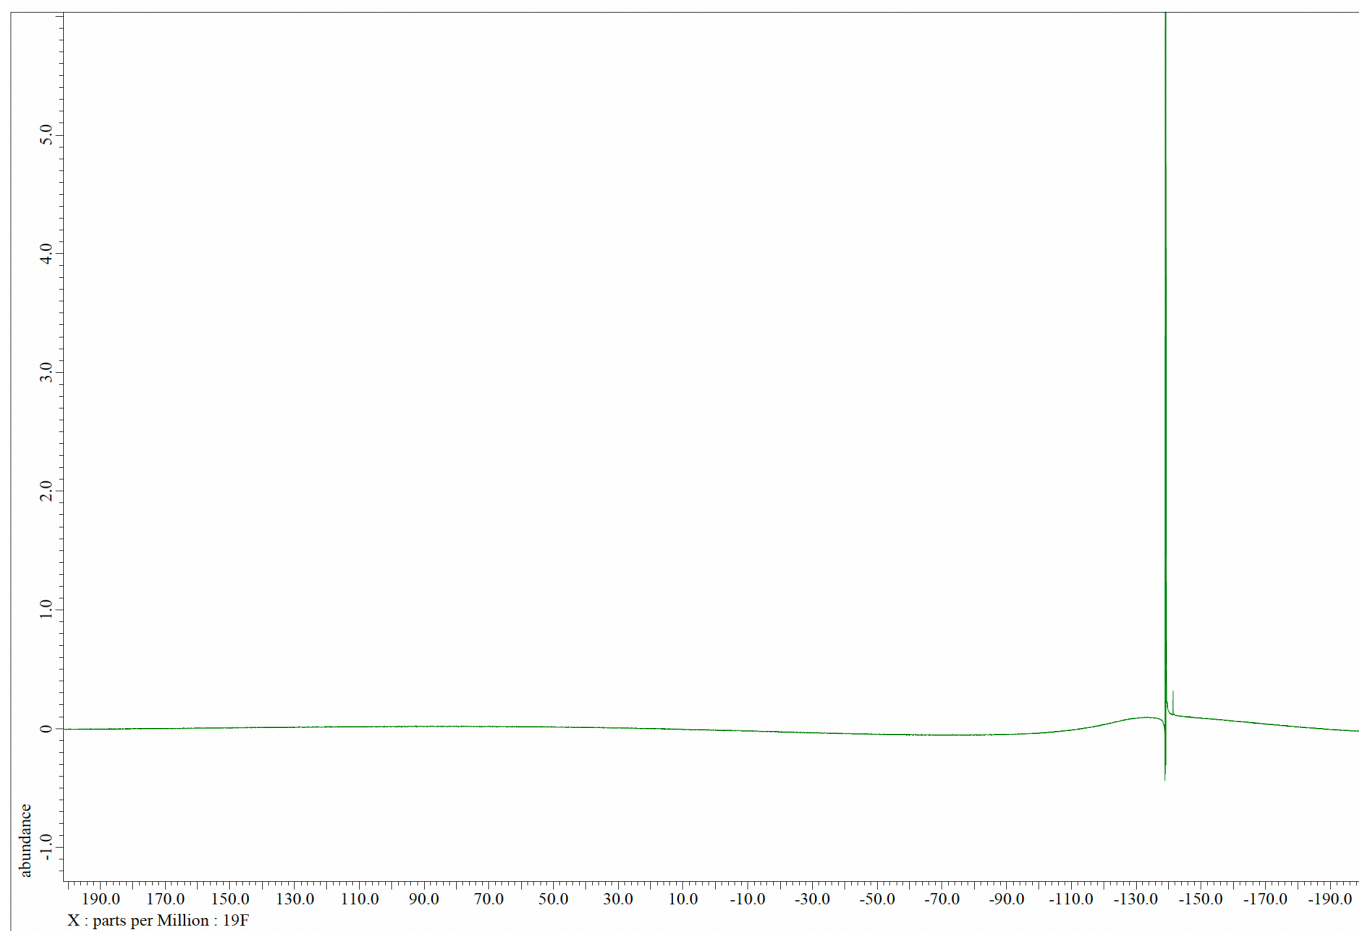

**Figure S34.**  $^{19}\text{F}$  NMR Spectrum of 4-decyl-2',3'-difluoro-2,2'',4''-trimethoxy-1,1':4',1''-terphenyl (**14**) (376 MHz,  $\text{CDCl}_3$ , r.t.).

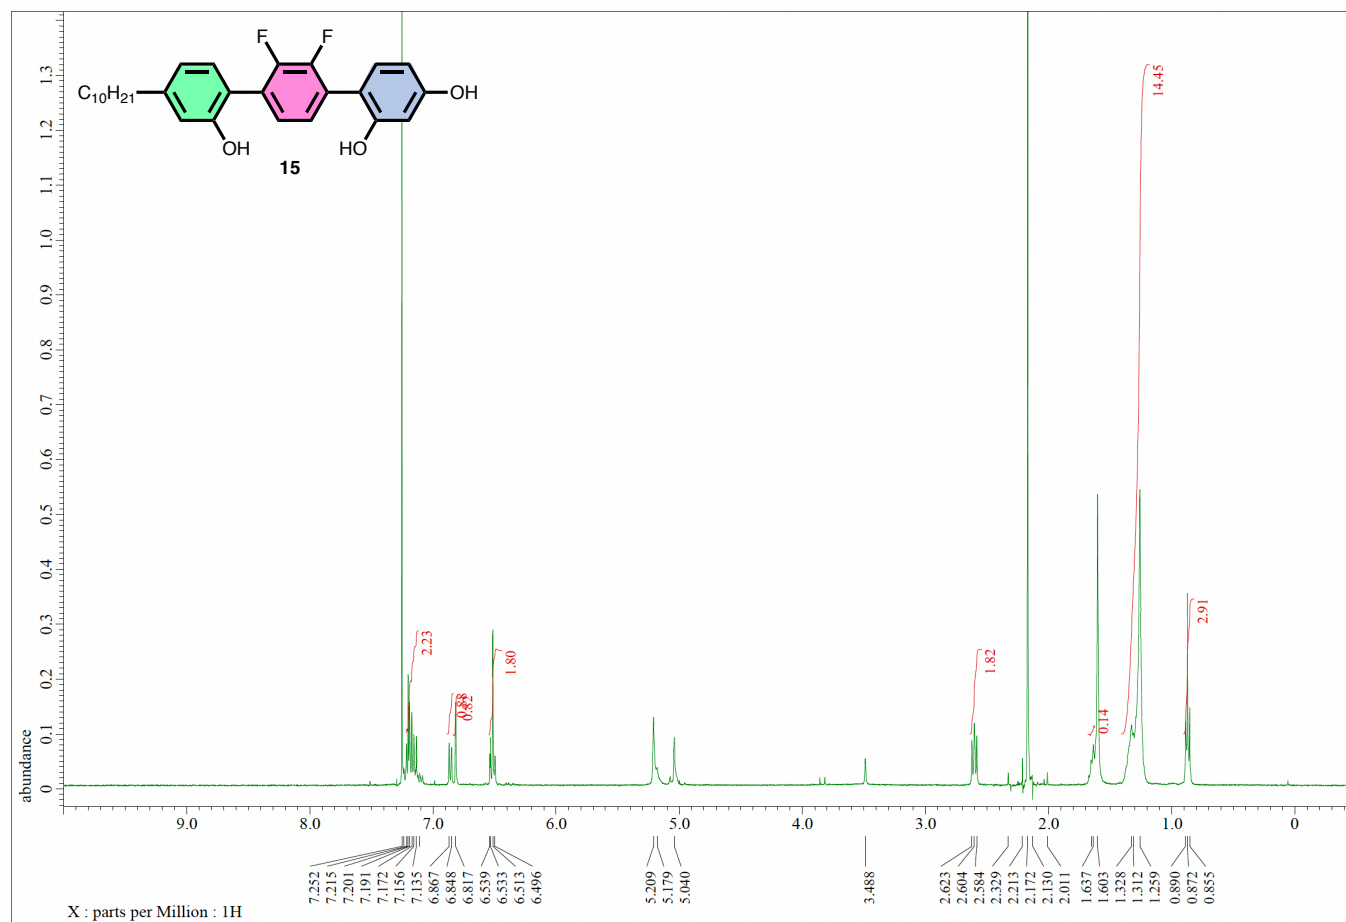

**Figure S35.**  $^1\text{H}$  NMR Spectrum of 4''-decyl-2',3'-difluoro[1,1':4',1''-terphenyl]-2,2'',4-triol (**15**) (400 MHz,  $\text{CDCl}_3$ , r.t.).



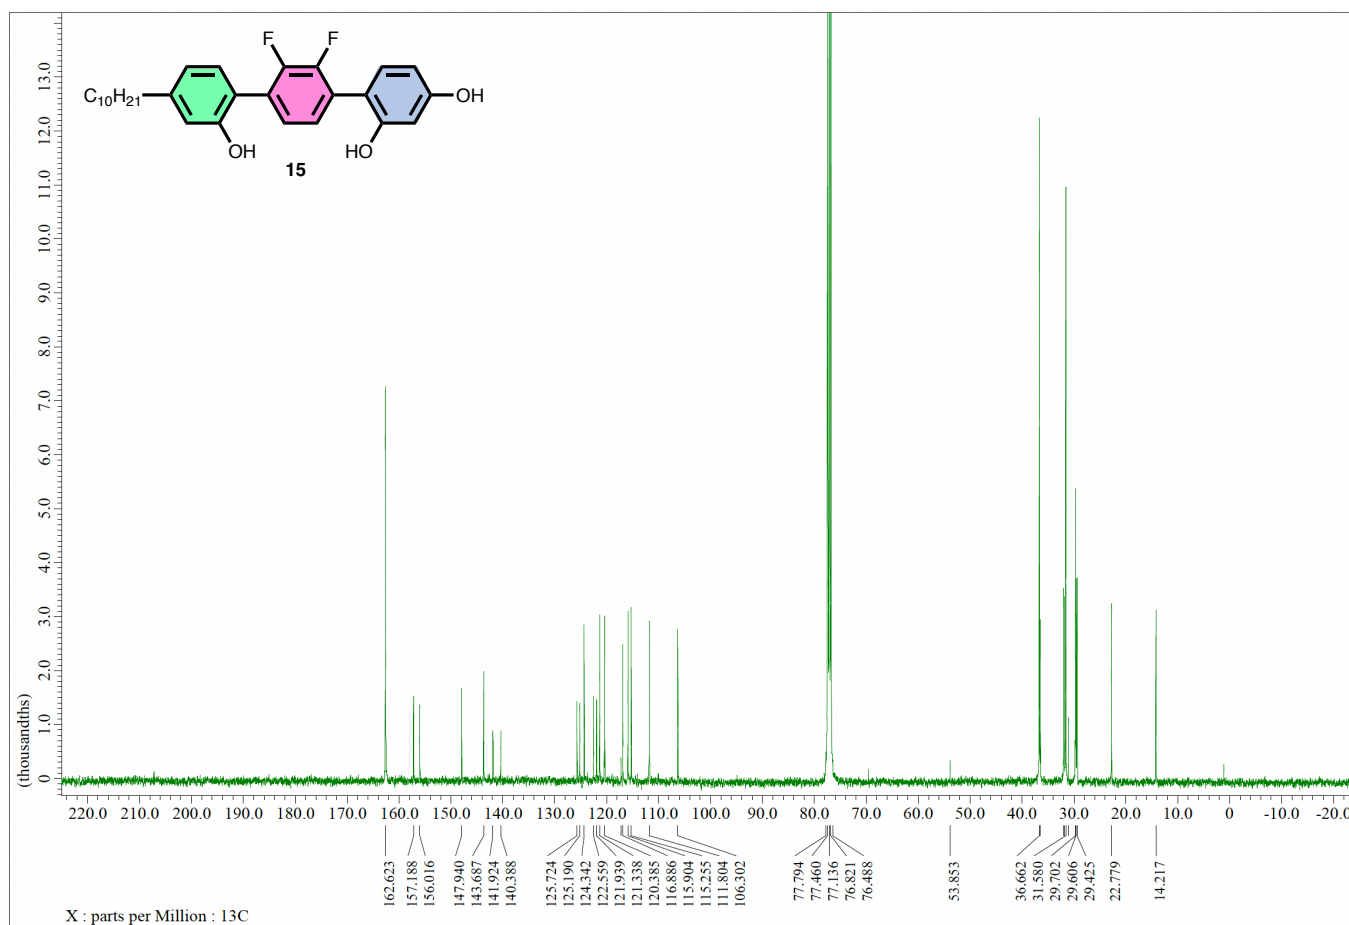

**Figure S36.**  $^{13}\text{C}\{^1\text{H}\}$  NMR Spectrum of 4''-decyl-2',3'-difluoro[1,1':4',1''-terphenyl]-2,2'',4-triol (**15**) (100 MHz,  $\text{CDCl}_3$ , r.t.).

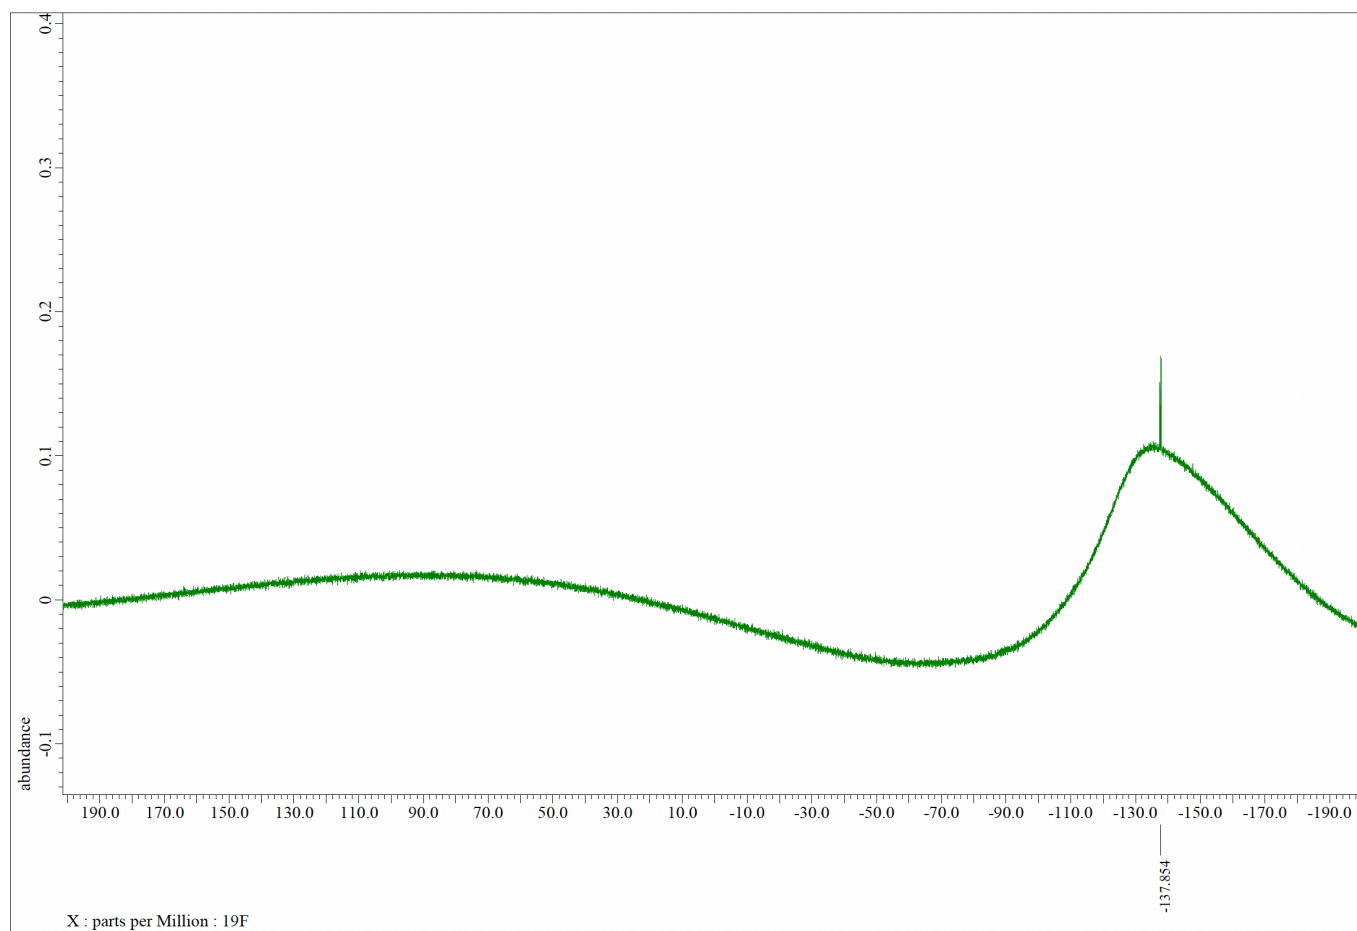

**Figure S37.**  $^{19}\text{F}$  NMR Spectrum of 4''-decyl-2',3'-difluoro[1,1':4',1''-terphenyl]-2,2'',4-triol (**15**) (376 MHz,  $\text{CDCl}_3$ , r.t.).

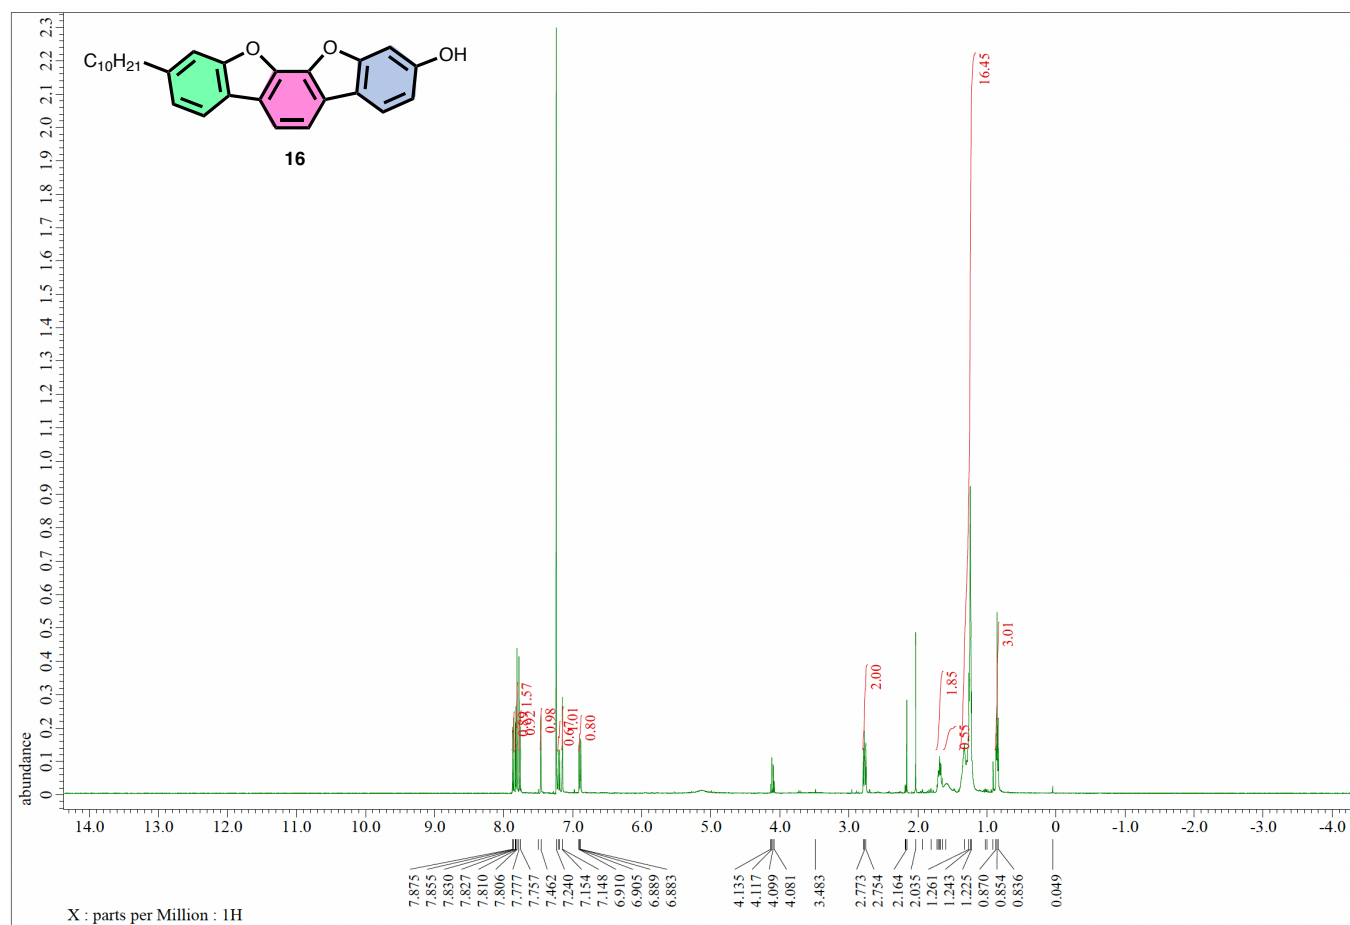

**Figure S38.** <sup>1</sup>H NMR Spectrum of 8-decyldibenzo[*d,d'*]benzo[2,1-*b*:3,4-*b'*]difuran-3-ol (**16**) (400 MHz, CDCl<sub>3</sub>, r.t.).

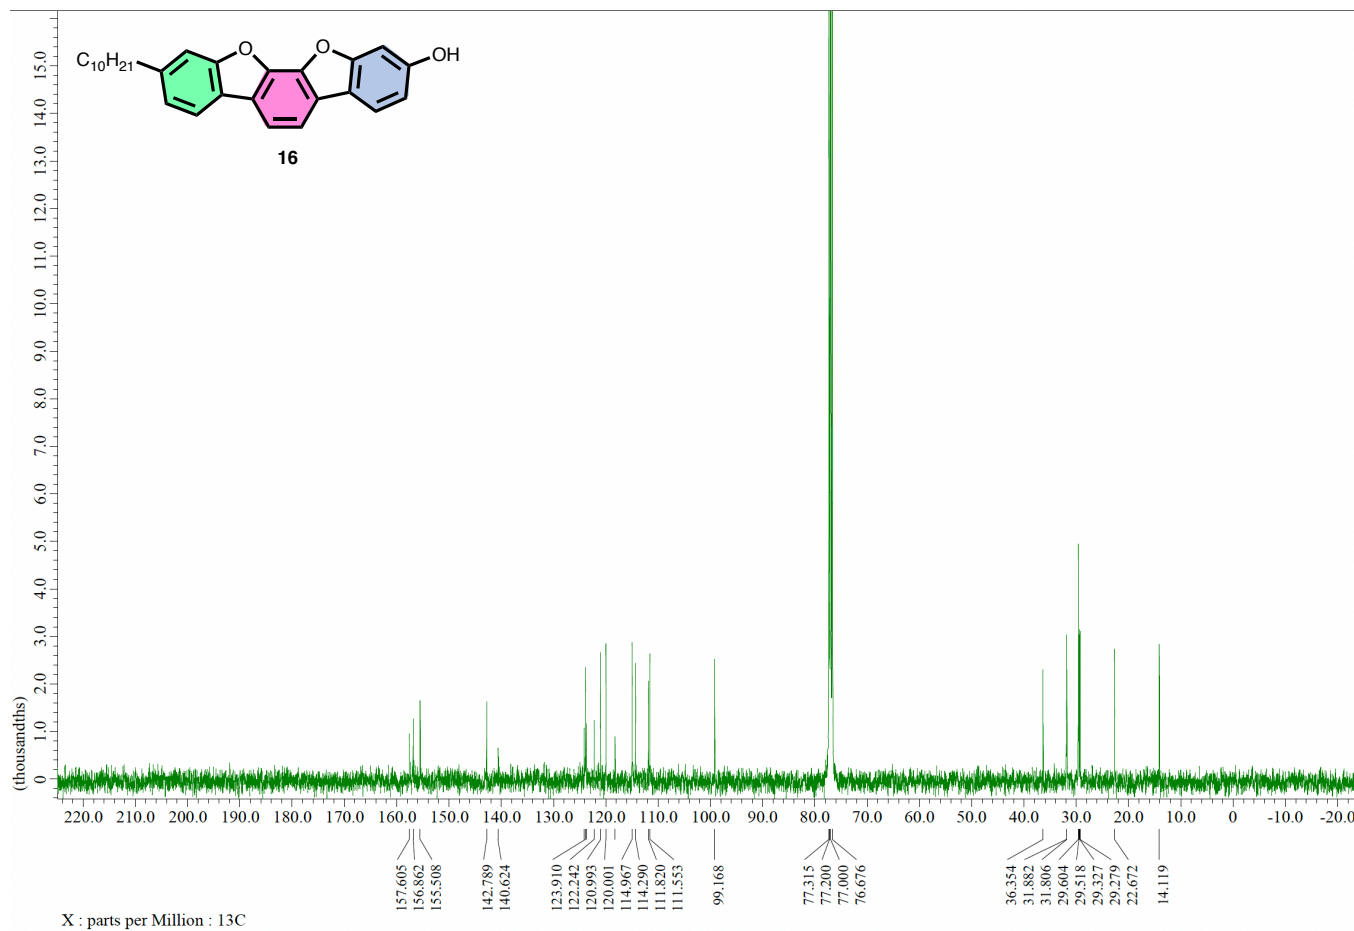

**Figure S39.**  $^{13}\text{C}\{^1\text{H}\}$  NMR Spectrum of 8-decyldibenzo[*d,d'*]benzo[2,1-*b:3,4-b'*]difuran-3-ol (**16**) (100 MHz,  $\text{CDCl}_3$ , r.t.).

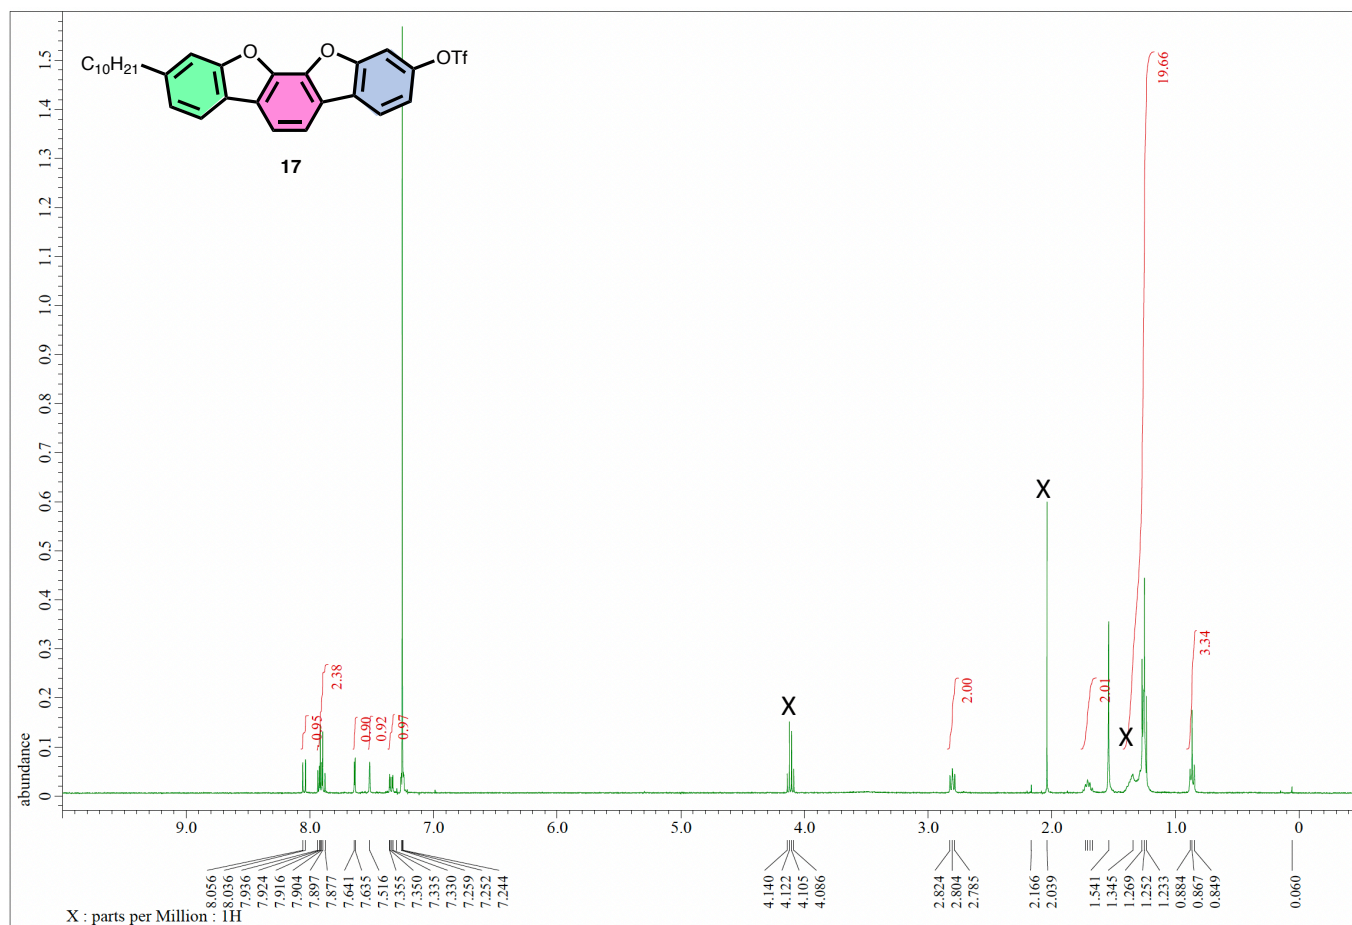

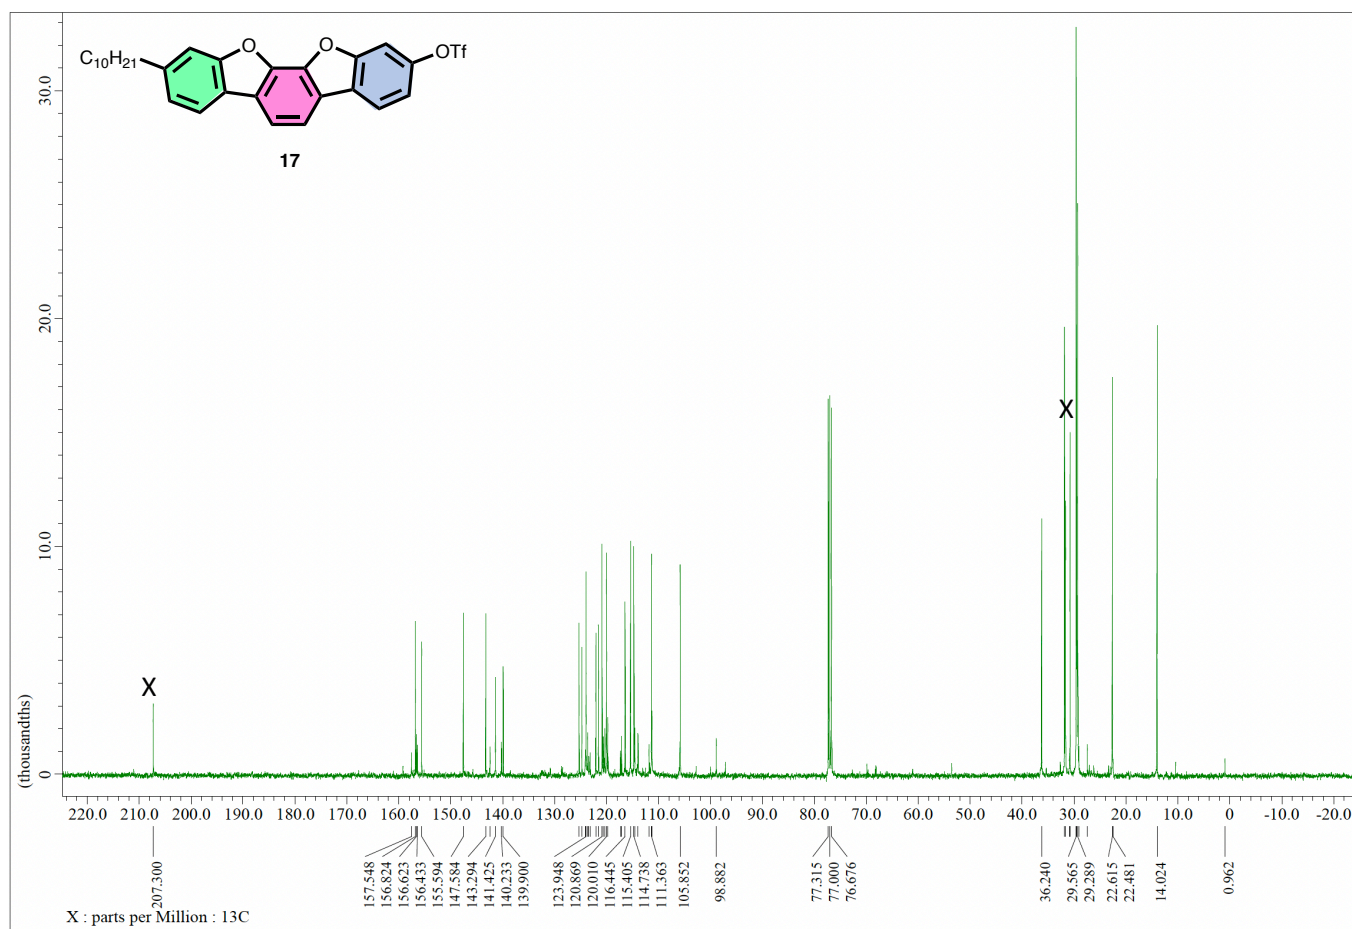

**Figure S41.**  $^{13}\text{C}\{^1\text{H}\}$  NMR Spectrum of 8-decyldibenzo[*d,d'*]benzo[2,1-*b:3,4-b'*]difuran-3-yltrifluoromethanesulfonate (**17**) (100 MHz,  $\text{CDCl}_3$ , r.t.). Xs indicate incorporated acetone.



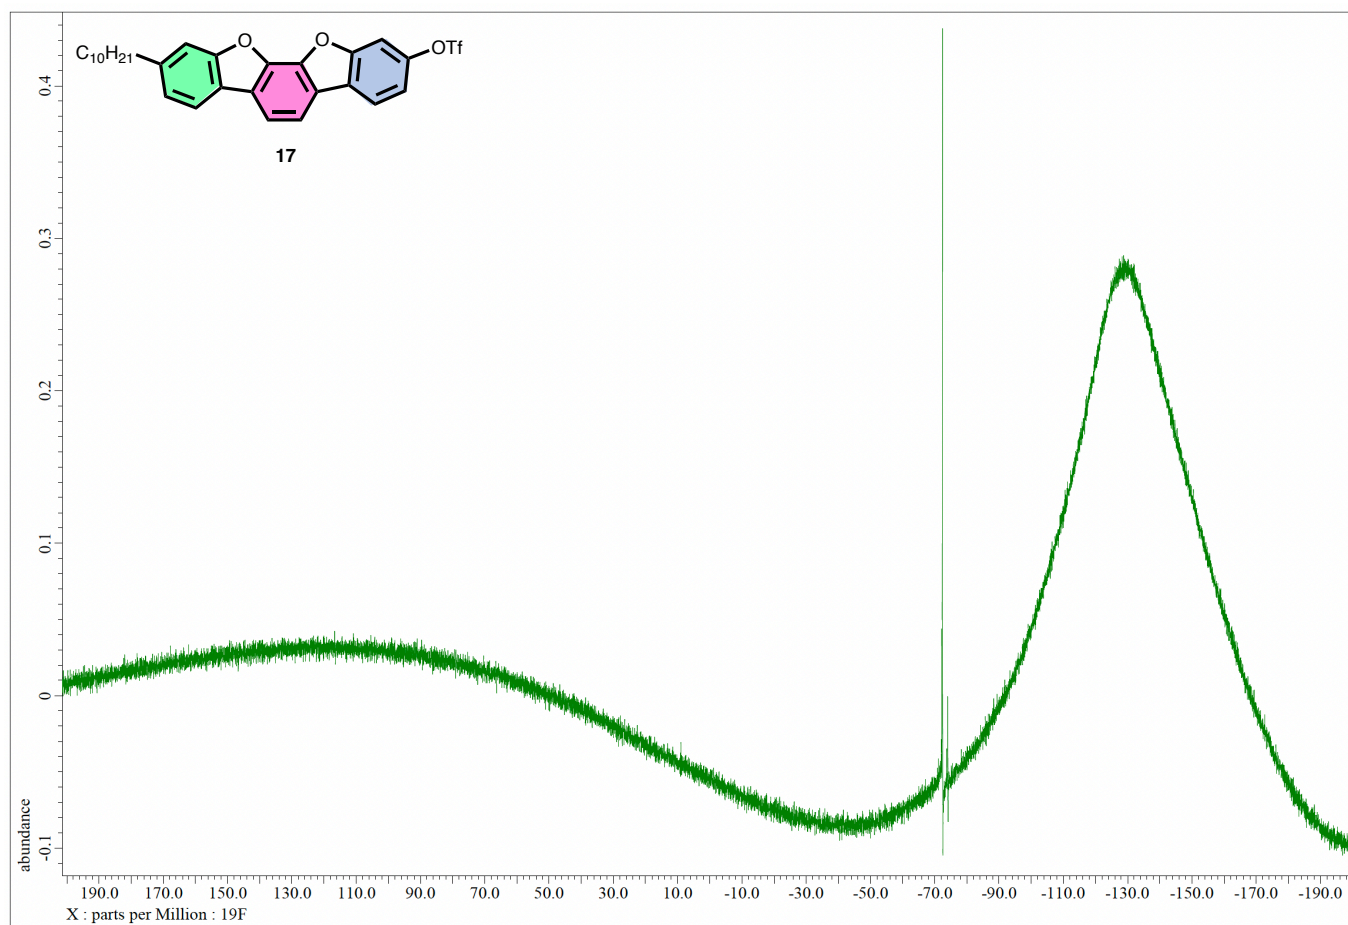

**Figure S42.**  $^{19}\text{F}$  NMR Spectrum of 8-decyldibenzo[*d,d'*]benzo[2,1-*b:3,4-b'*]difuran-3-yltrifluoromethanesulfonate (**17**) (376 MHz,  $\text{CDCl}_3$ , r.t.).

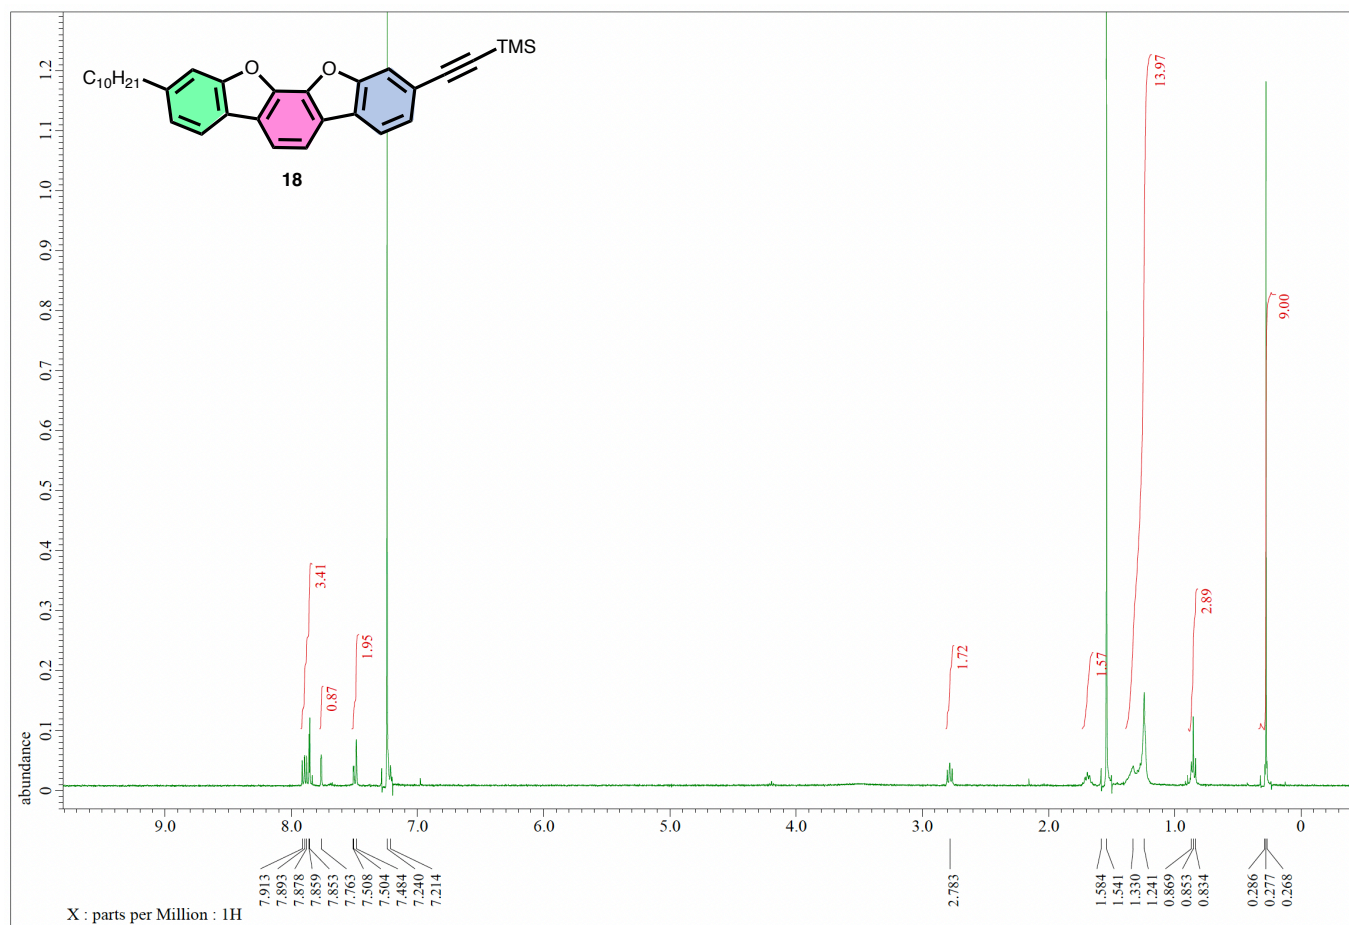

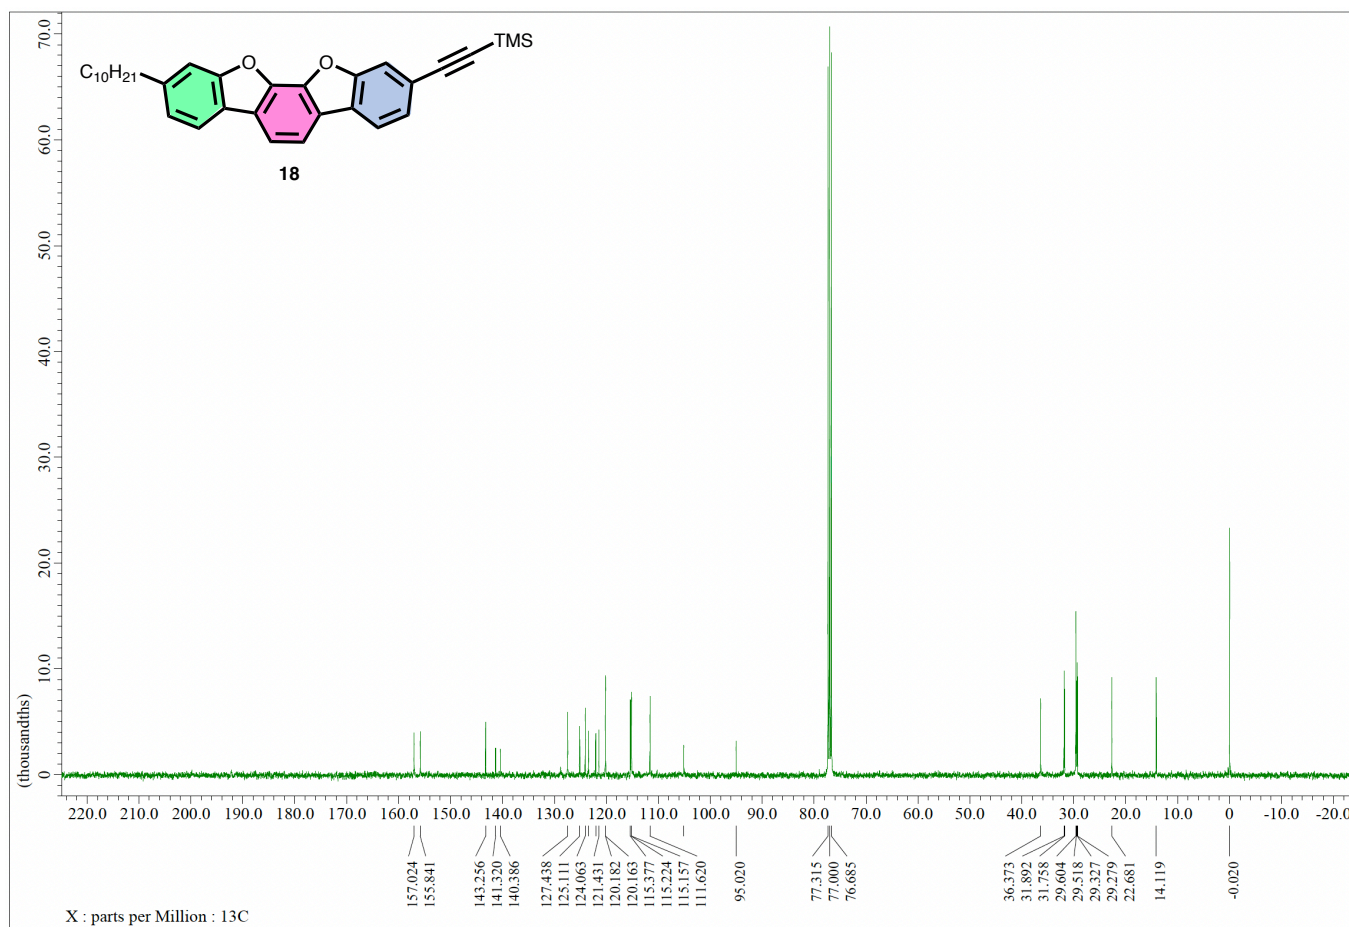

**Figure S44.**  $^{13}\text{C}\{^1\text{H}\}$  NMR Spectrum of 3-(trimethylsilylethynyl)-8-decyldibenzo[*d,d'*]benzo[2,1-*b*:3,4-*b'*]difuran (**18**) (100 MHz,  $\text{CDCl}_3$ , r.t.).

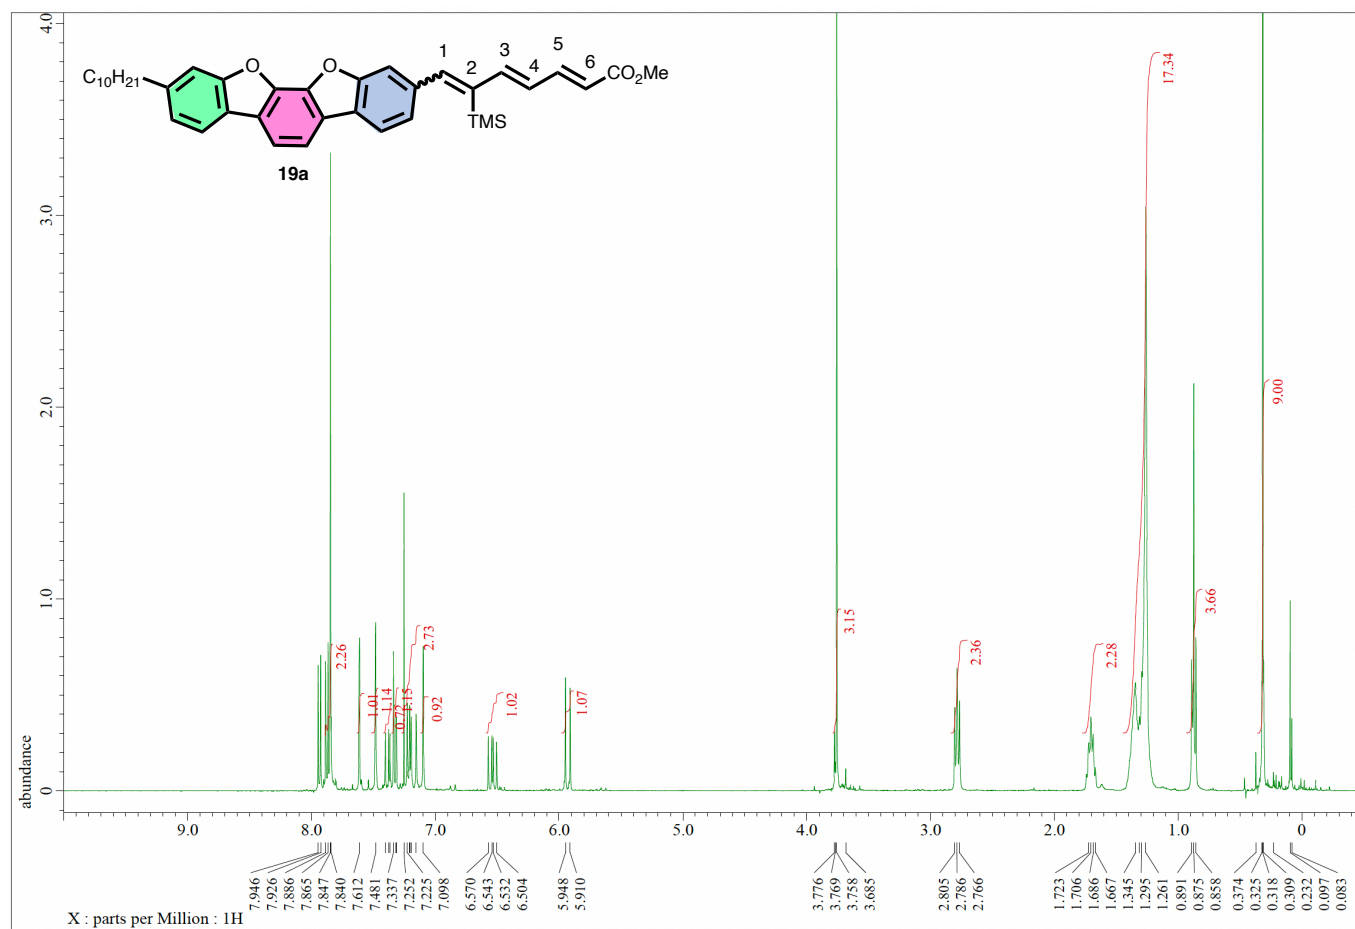

**Figure S45.**  $^1H$  NMR Spectrum of 3-(6-methoxycarbonyl-2-trimethylsilylhexa-1,3,5-trien-1-yl)-8-decyldibenzo[*d,d'*]benzo[2,1-*b:3,4-b'*]difuran (**19a**) (400 MHz,  $CDCl_3$ , r.t.).

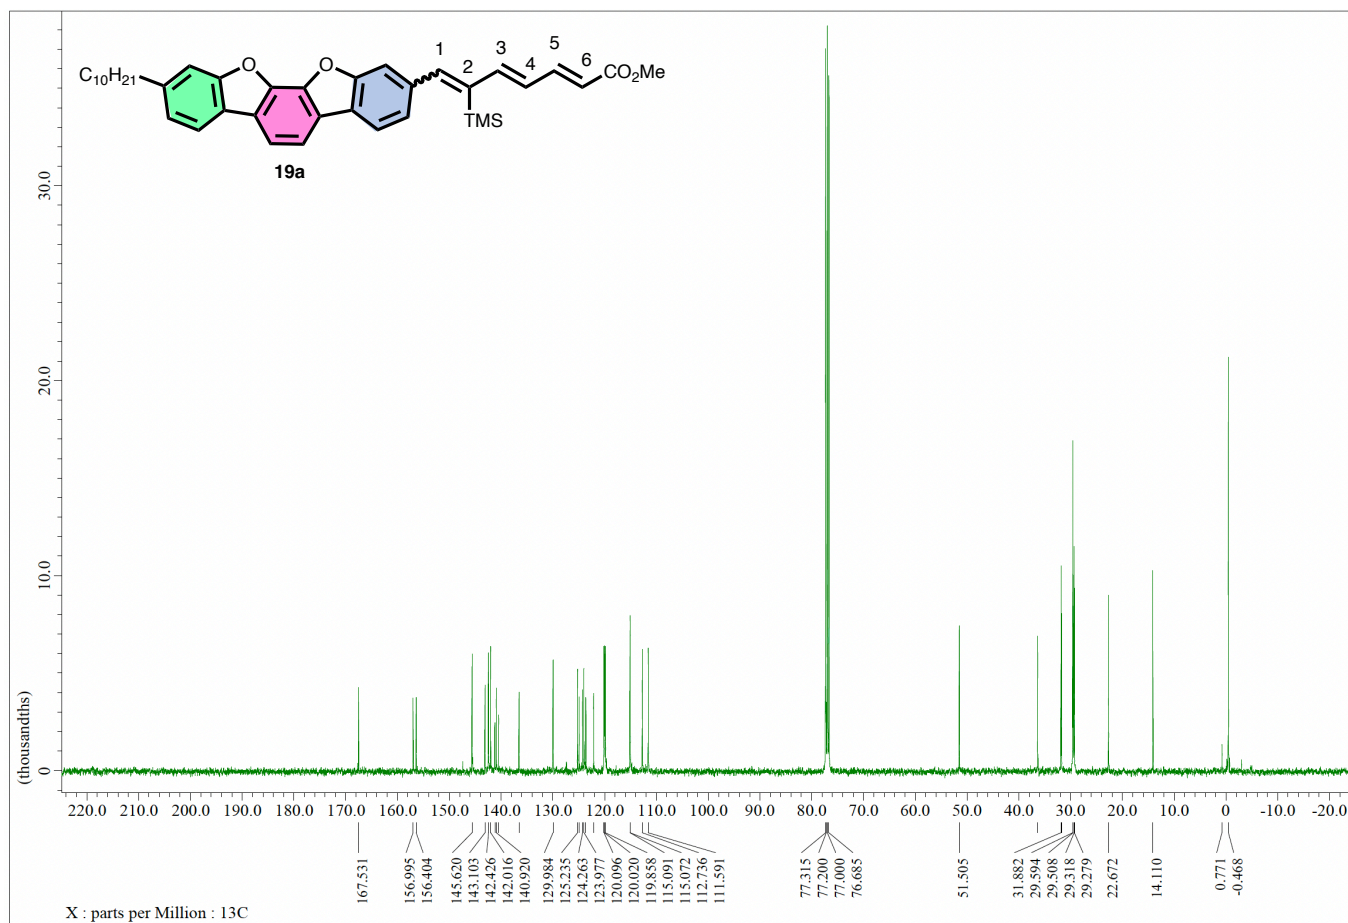

**Figure S46.**  $^{13}C\{^1H\}$  NMR Spectrum of 3-(6-methoxycarbonyl-2-trimethylsilylhexa-1,3,5-trien-1-yl)-8-decyldibenzo[*d,d'*]benzo[2,1-*b*:3,4-*b'*]difuran (**19a**) (100 MHz,  $CDCl_3$ , r.t.).

## Mass Spectrum SmartFormula Report

|                      |                             |                   |                      |       |
|----------------------|-----------------------------|-------------------|----------------------|-------|
| <b>Analysis Info</b> |                             | Acquisition Date  | 2/24/2021 6:44:16 PM |       |
| Analysis Name        | D:\Data\HiranoLab\OKH0681.d | Operator          | BDAL                 |       |
| Method               | apci_pos_wide_low_140605.m  | Instrument / Ser# | micrOTOF-Q II        | 10323 |
| Sample Name          | OKH0681                     |                   |                      |       |
| Comment              |                             |                   |                      |       |

|                              |            |                       |           |                  |           |
|------------------------------|------------|-----------------------|-----------|------------------|-----------|
| <b>Acquisition Parameter</b> |            |                       |           |                  |           |
| Source Type                  | APCI       | Ion Polarity          | Positive  | Set Nebulizer    | 1.6 Bar   |
| Focus                        | Not active | Set Capillary         | 4500 V    | Set Dry Heater   | 200 °C    |
| Scan Begin                   | 100 m/z    | Set End Plate Offset  | -500 V    | Set Dry Gas      | 3.0 l/min |
| Scan End                     | 2000 m/z   | Set Collision Cell RF | 150.0 Vpp | Set Divert Valve | Waste     |

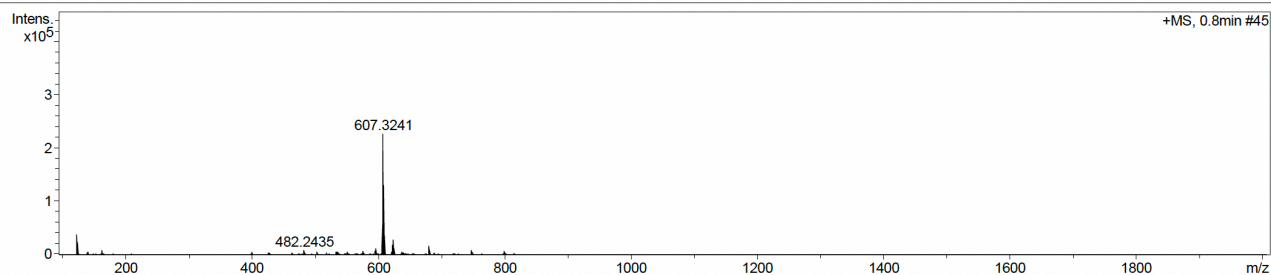

| Meas. m/z | # | Formula                                           | Score  | m/z      | err [mDa] | err [ppm] | mSigma | rdb  | e <sup>-</sup> Conf | N-Rule |
|-----------|---|---------------------------------------------------|--------|----------|-----------|-----------|--------|------|---------------------|--------|
| 607.3241  | 1 | C <sub>39</sub> H <sub>47</sub> O <sub>4</sub> Si | 100.00 | 607.3238 | -0.3      | -0.4      | 49.0   | 17.5 | even                | ok     |

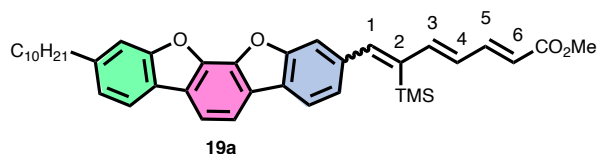

**Figure S47.** High resolution mass spectrum (APCI) of 3-(6-methoxycarbonyl-2-trimethylsilylhexa-1,3,5-trien-1-yl)-8-decyldibenzo[*d,d'*]benzo[2,1-*b:3,4-b'*]difuran (**19a**).



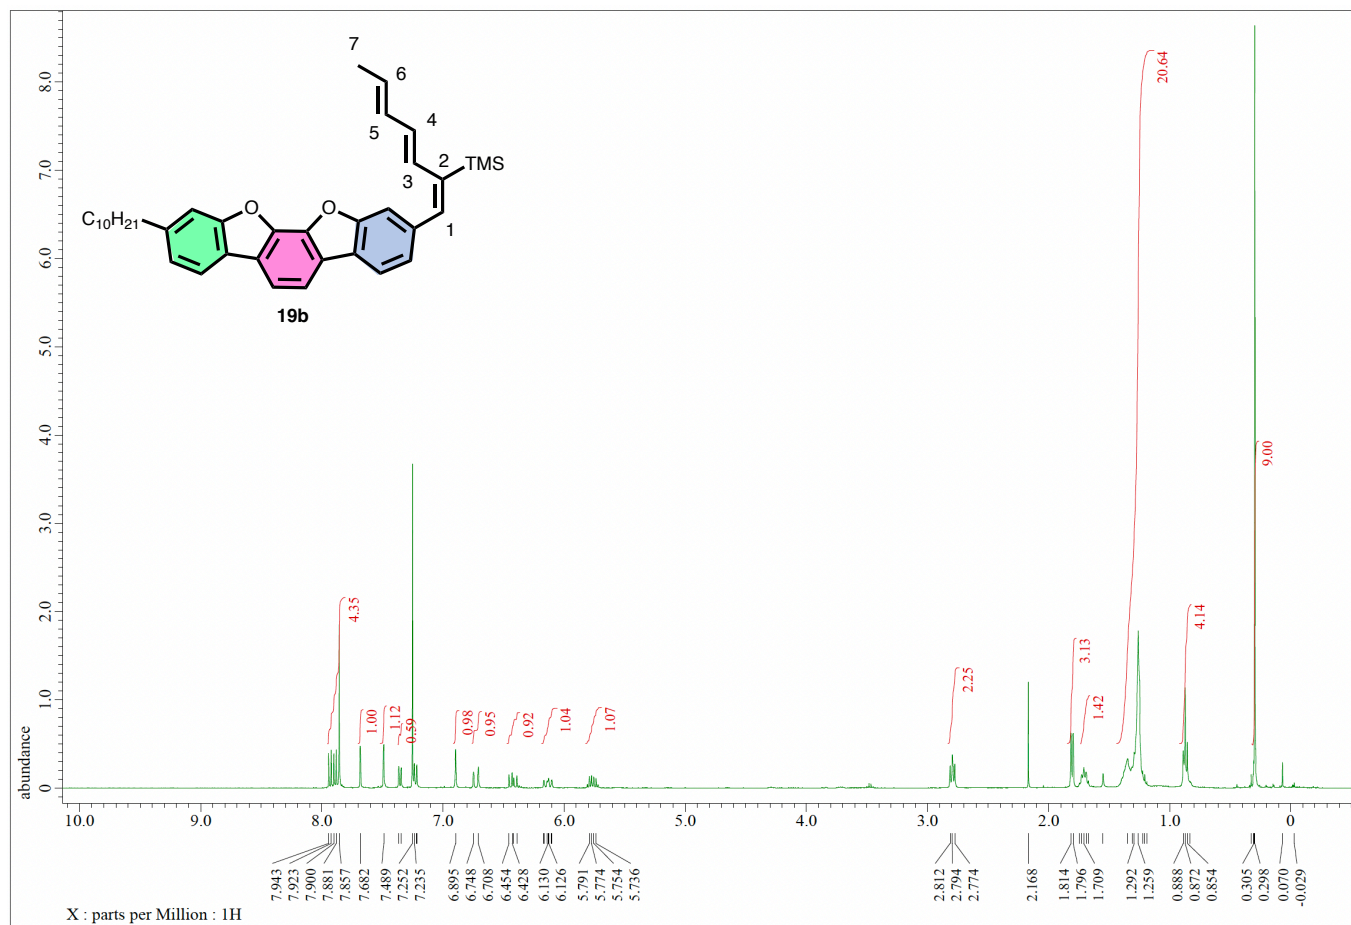

**Figure S48.**  $^1\text{H}$  NMR Spectrum of 3- $\{(1E,3E,5E)\}$ -2-trimethylsilylhepta-1,3,5-trien-1-yl}-8-decyldibenzo[ $d,d'$ ]benzo[2,1- $b:3,4-b'$ ]difuran (**19b**) (400 MHz,  $\text{CDCl}_3$ , r.t.).

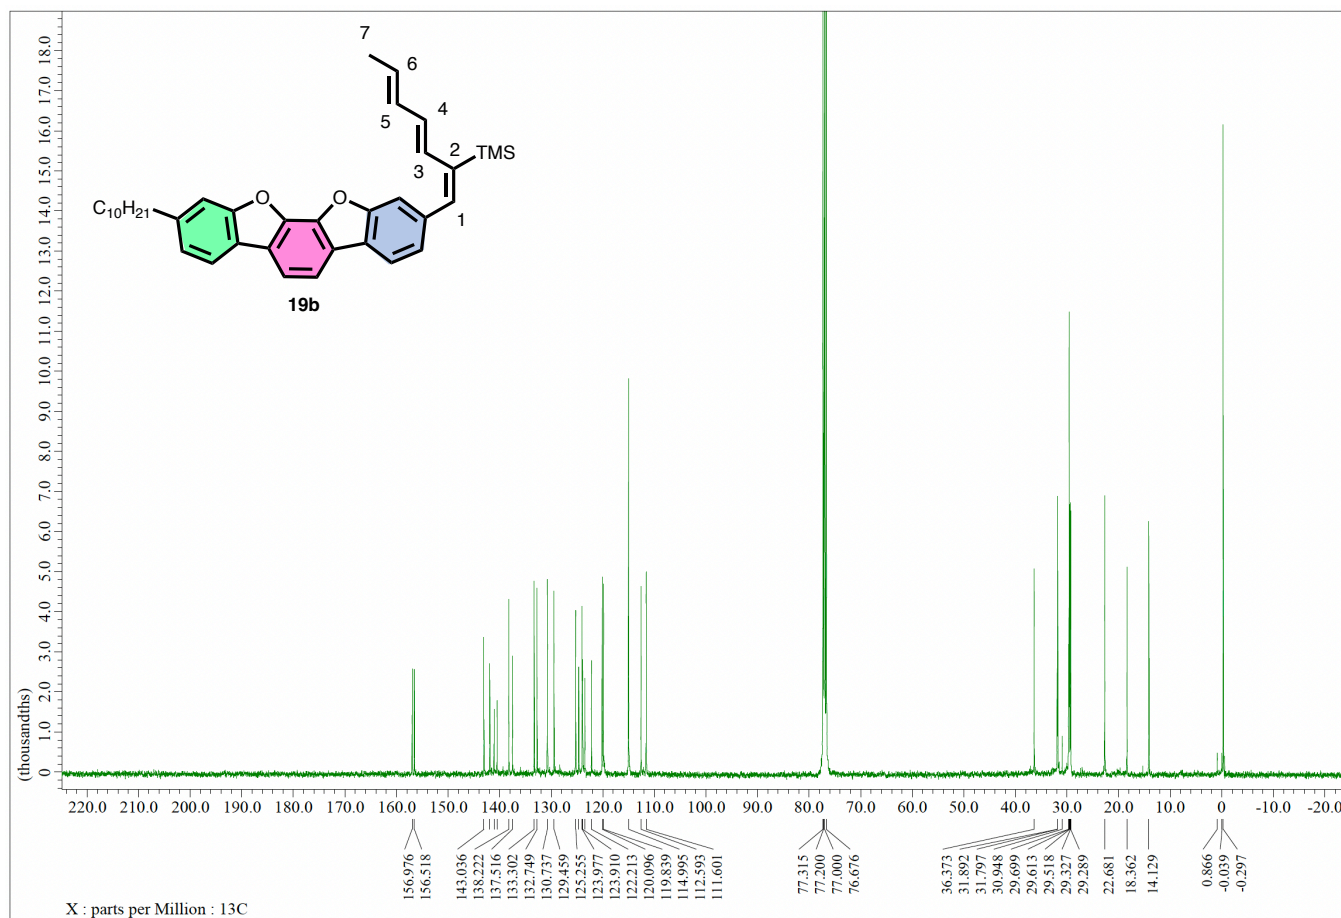

**Figure S49.**  $^{13}\text{C}\{^1\text{H}\}$  NMR Spectrum of 3- $\{(1E,3E,5E)\text{-}2\text{-trimethylsilylhepta-}1,3,5\text{-trien-}1\text{-yl}\}$ -8-decyldibenzo[ $d,d'$ ]benzo[2,1- $b:3,4\text{-}b'$ ]difuran (**19b**) (100 MHz,  $\text{CDCl}_3$ , r.t.).

## Mass Spectrum SmartFormula Report

## Analysis Info

Analysis Name D:\Data\HiranoLab\OKH0713.d  
Method apci\_pos\_wide\_low\_140605.m  
Sample Name OKH0713  
Comment

Acquisition Date 2/24/2021 7:02:13 PM  
Operator BDAL  
Instrument / Ser# micrOTOF-Q II 10323

## Acquisition Parameter

|             |            |                       |           |                  |           |
|-------------|------------|-----------------------|-----------|------------------|-----------|
| Source Type | APCI       | Ion Polarity          | Positive  | Set Nebulizer    | 1.6 Bar   |
| Focus       | Not active | Set Capillary         | 4500 V    | Set Dry Heater   | 200 °C    |
| Scan Begin  | 100 m/z    | Set End Plate Offset  | -500 V    | Set Dry Gas      | 3.0 l/min |
| Scan End    | 2000 m/z   | Set Collision Cell RF | 150.0 Vpp | Set Divert Valve | Waste     |

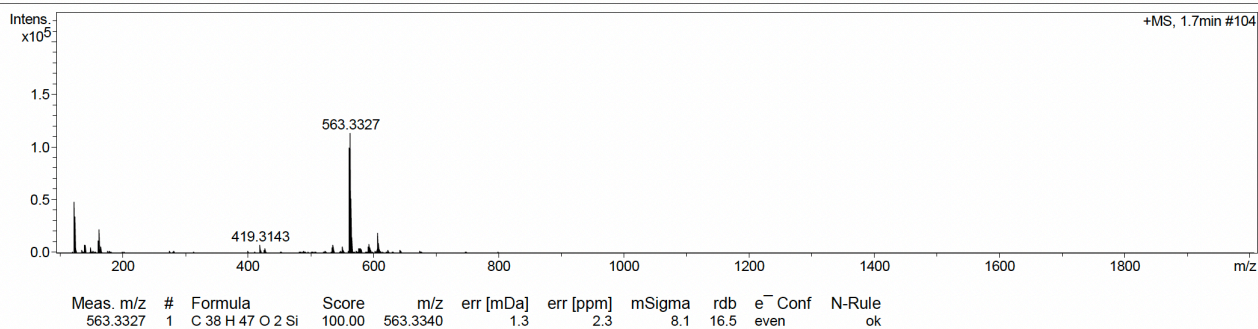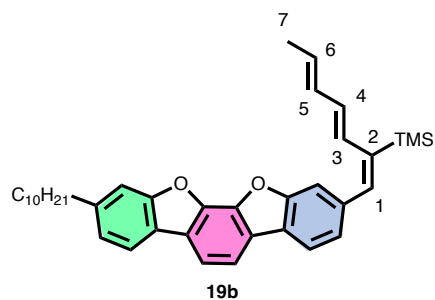

**Figure S50.** High resolution mass spectrum (APCI) of 3-((1*E*,3*E*,5*E*)-2-trimethylsilylhepta-1,3,5-trien-1-yl)-8-decyldibenzo[*d,d'*]benzo[2,1-*b*:3,4-*b'*]difuran (**19b**).

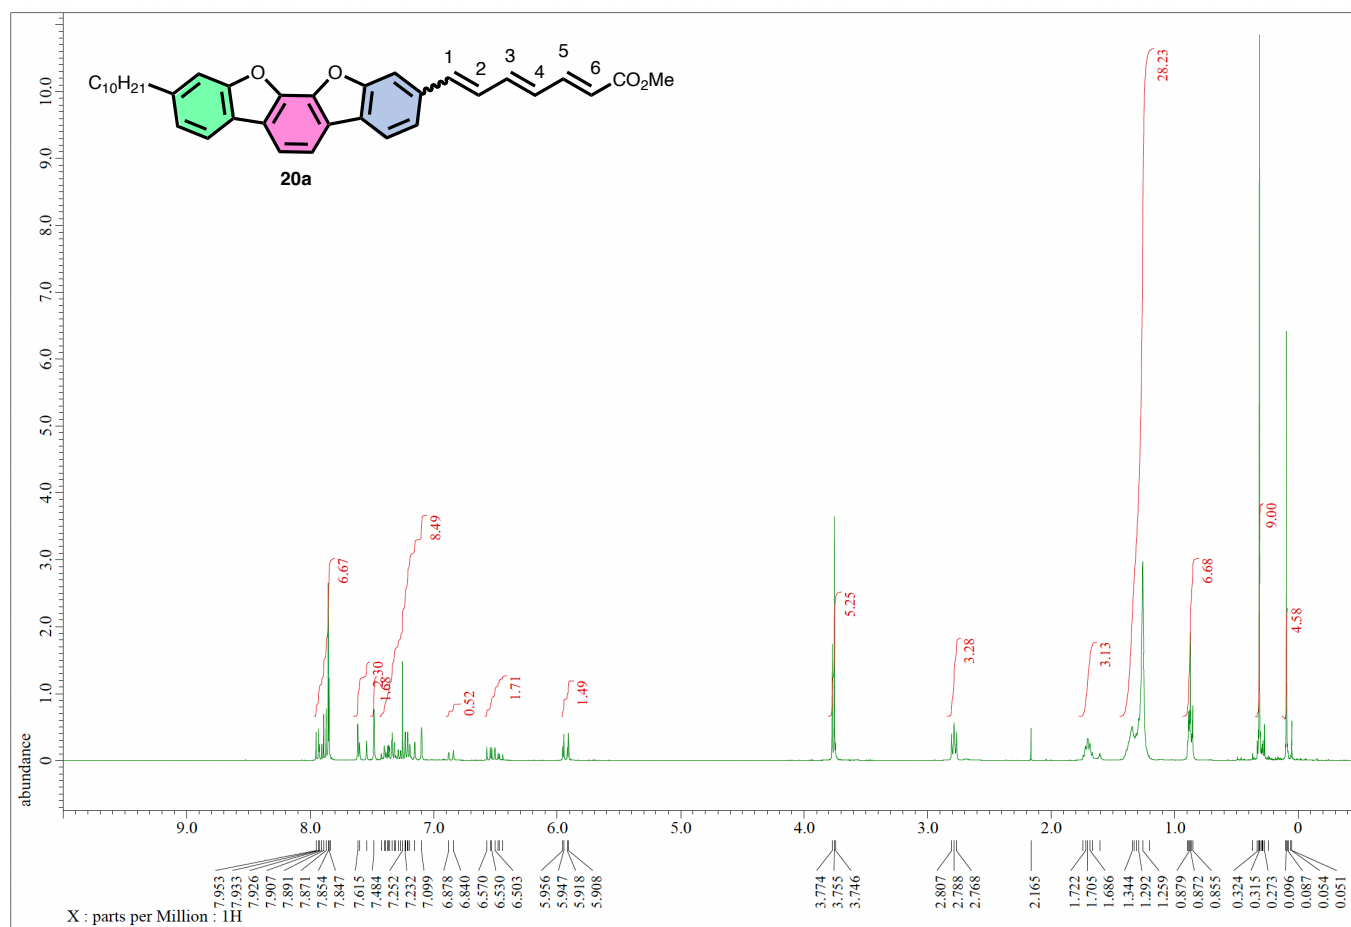

**Figure S51.**  $^1\text{H}$  NMR Spectrum of 3-((1*E*,3*E*,5*E*)-6-methoxycarbonylhepta-1,3,5-trien-1-yl)-8-decyldibenzo[*d,d'*]benzo[2,1-*b:3,4-*b'*]*difuran (**20a**) (400 MHz,  $\text{CDCl}_3$ , r.t.).

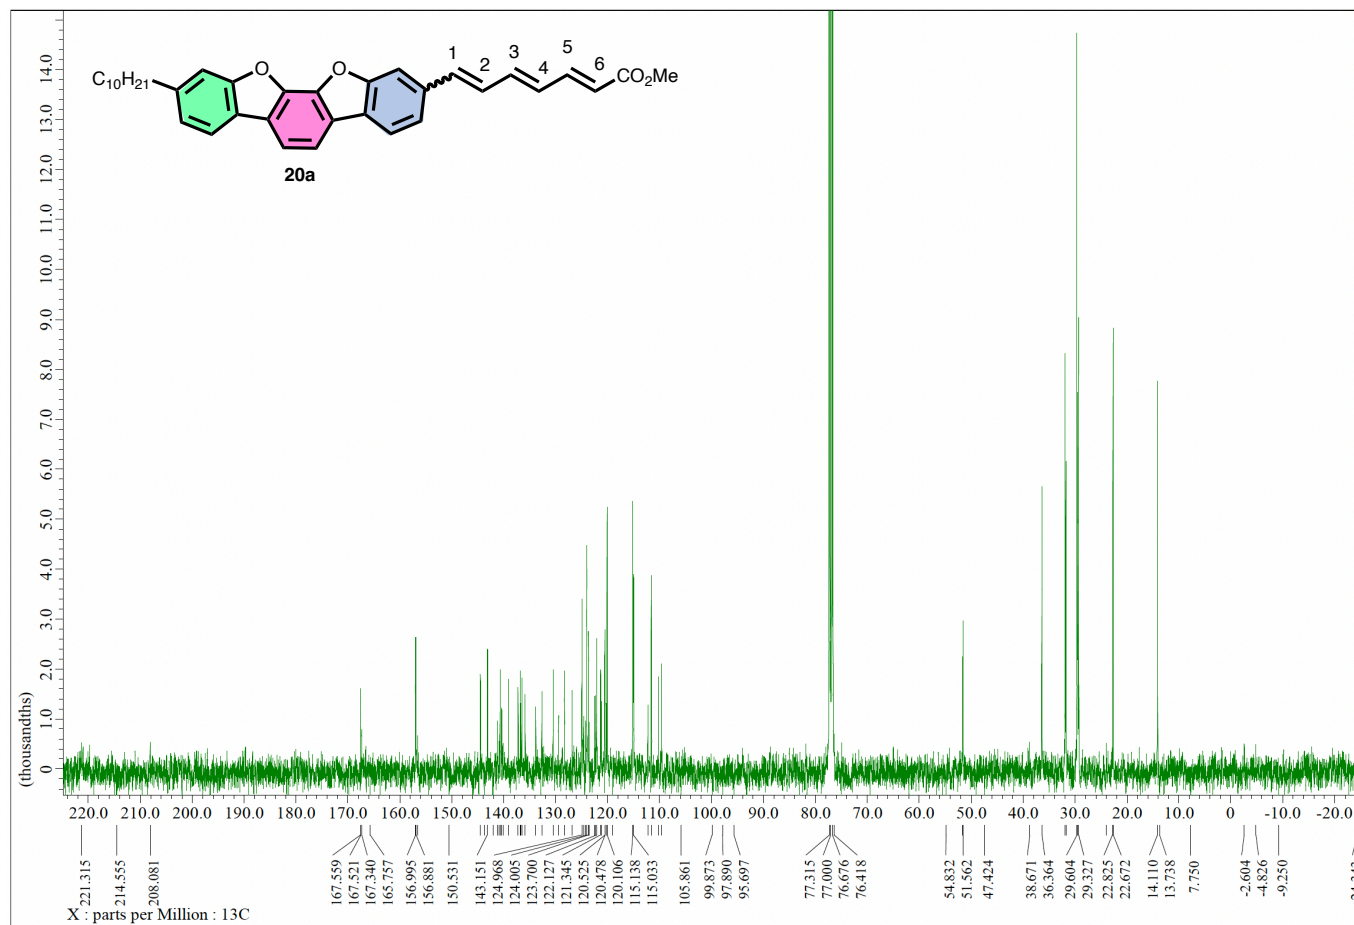

**Figure S52.**  $^{13}C\{^1H\}$  NMR Spectrum of 3- $\{(1E,3E,5E)\}$ -6-methoxycarbonylhepta-1,3,5-trien-1-yl- $\}$ -8-decyldibenzo[*d,d'*]benzo[2,1-*b:3,4-b'*]difuran (**20a**) (100 MHz, CDCl<sub>3</sub>, r.t.).

## Mass Spectrum SmartFormula Report

## Analysis Info

Analysis Name D:\Data\HiranoLab\OKH0715.d  
 Method apci\_pos\_wide\_low\_140605.m  
 Sample Name OKH0715  
 Comment

Acquisition Date 2/24/2021 6:55:02 PM  
 Operator BDAL  
 Instrument / Ser# micrOTOF-Q II 10323

## Acquisition Parameter

|             |            |                       |           |                  |           |
|-------------|------------|-----------------------|-----------|------------------|-----------|
| Source Type | APCI       | Ion Polarity          | Positive  | Set Nebulizer    | 1.6 Bar   |
| Focus       | Not active | Set Capillary         | 4500 V    | Set Dry Heater   | 200 °C    |
| Scan Begin  | 100 m/z    | Set End Plate Offset  | -500 V    | Set Dry Gas      | 3.0 l/min |
| Scan End    | 2000 m/z   | Set Collision Cell RF | 150.0 Vpp | Set Divert Valve | Waste     |

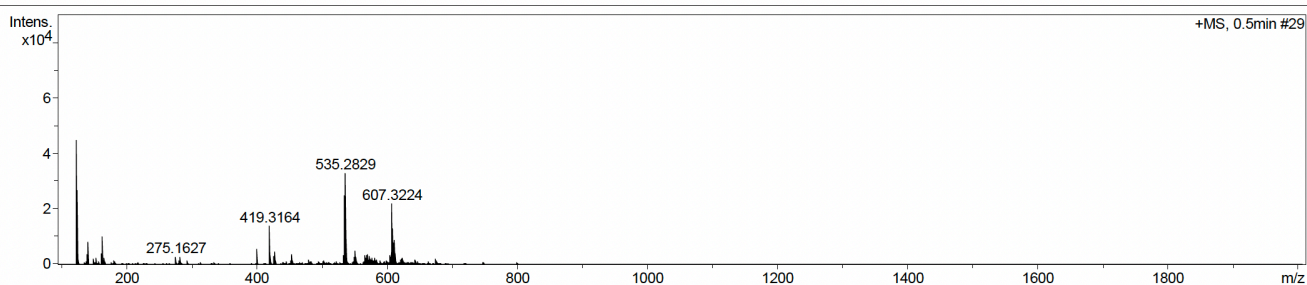

| Meas. m/z | # | Formula           | Score  | m/z      | err [mDa] | err [ppm] | mSigma | rdB  | e <sup>-</sup> Conf | N-Rule |
|-----------|---|-------------------|--------|----------|-----------|-----------|--------|------|---------------------|--------|
| 535.2829  | 1 | C 36 H 39 O 4     | 100.00 | 535.2843 | 1.3       | 2.5       | 30.5   | 17.5 | even                | ok     |
|           | 2 | C 37 H 35 N 4     | 34.65  | 535.2856 | 2.7       | 5.0       | 32.0   | 22.5 | even                | ok     |
|           | 3 | C 32 H 35 N 6 O 2 | 80.99  | 535.2816 | -1.3      | -2.5      | 38.7   | 18.5 | even                | ok     |
|           | 4 | C 31 H 39 N 2 O 6 | 24.86  | 535.2803 | -2.7      | -5.0      | 44.3   | 13.5 | even                | ok     |

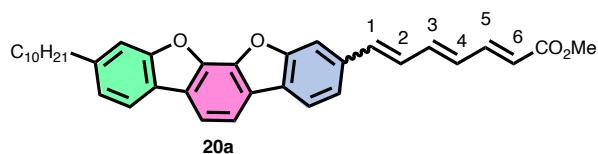

**Figure S53.** High resolution mass spectrum (APIC) of 3-((1*E*,3*E*,5*E*)-6-methoxycarbonylhepta-1,3,5-trien-1-yl)-8-decyldibenzo[*d,d'*]benzo[2,1-*b:3,4-b'*]difuran (**20a**).



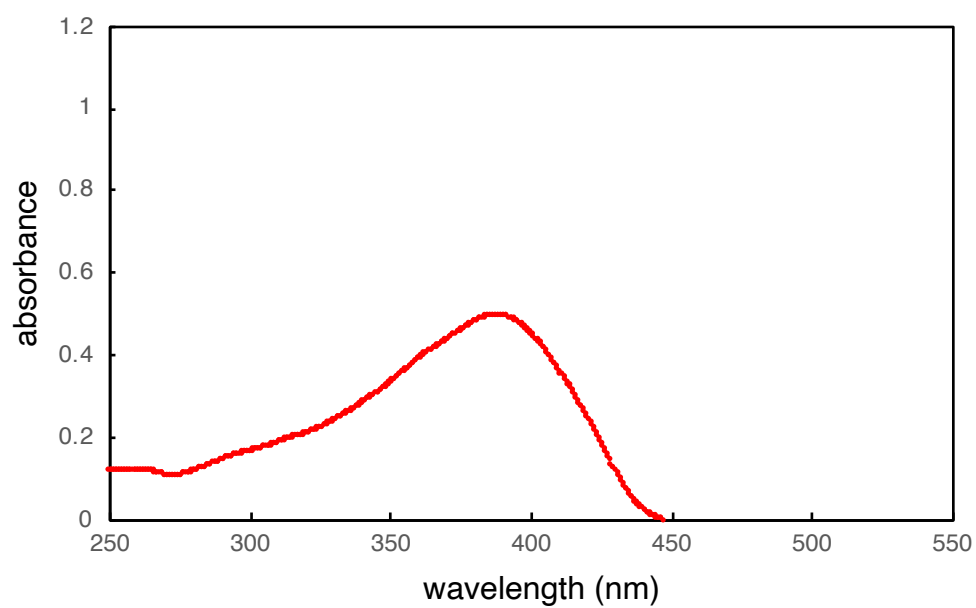

**Figure S54.** UV-vis spectrum of **9a** ( $1.00 \times 10^{-5}$  M) in chloroform.

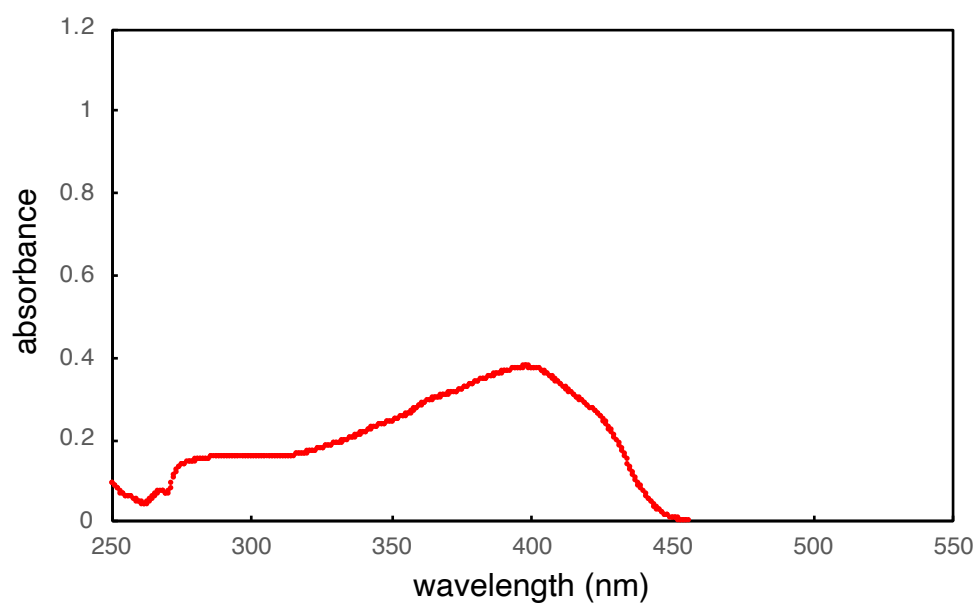

**Figure S55.** UV-vis spectrum of **10b** ( $1.00 \times 10^{-5}$  M) in chloroform.

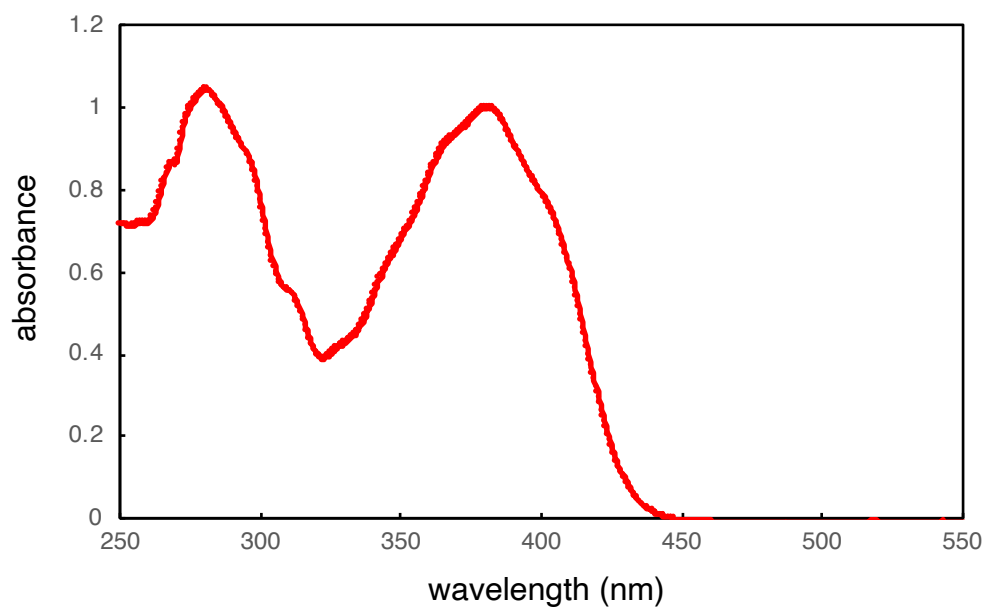

**Figure S56.** UV-vis spectrum of **20a** ( $1.00 \times 10^{-5}$  M) in chloroform.

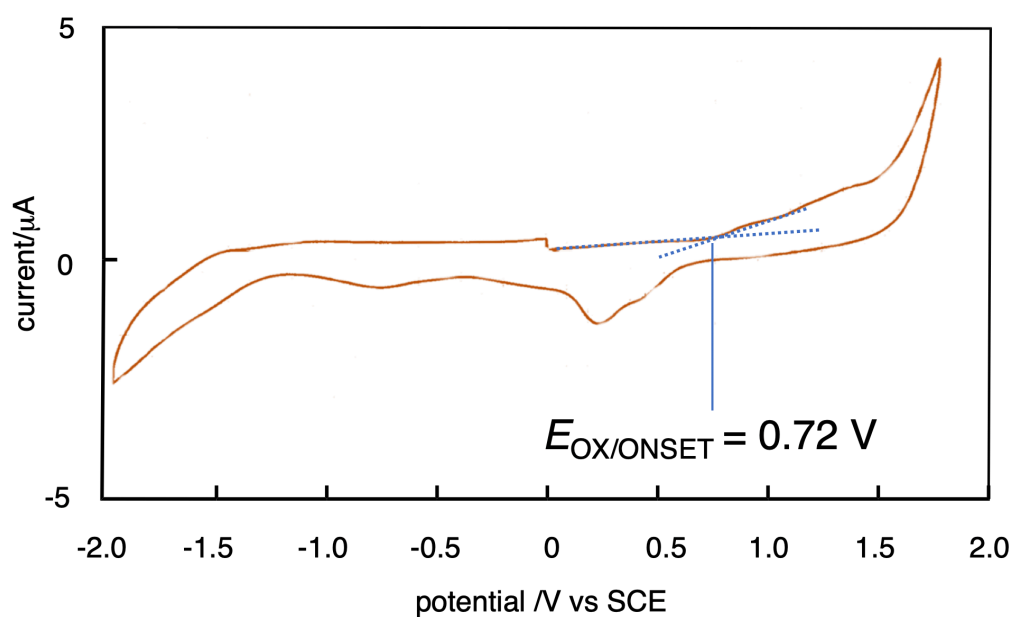

**Figure S57.** Cyclic voltammogram of **9a** in a dichloromethane solution at the Pt electrodes with  $[\text{Bu}_4\text{N}][\text{ClO}_4]$  (0.1 M) as the supporting electrolyte at a sweep rate of  $50 \text{ m Vs}^{-1}$ . Platinum was employed as the working electrode, and the potential scale was corrected with the standard redox potential of ferrocene ( $E = +0.380 \text{ V}$ ).

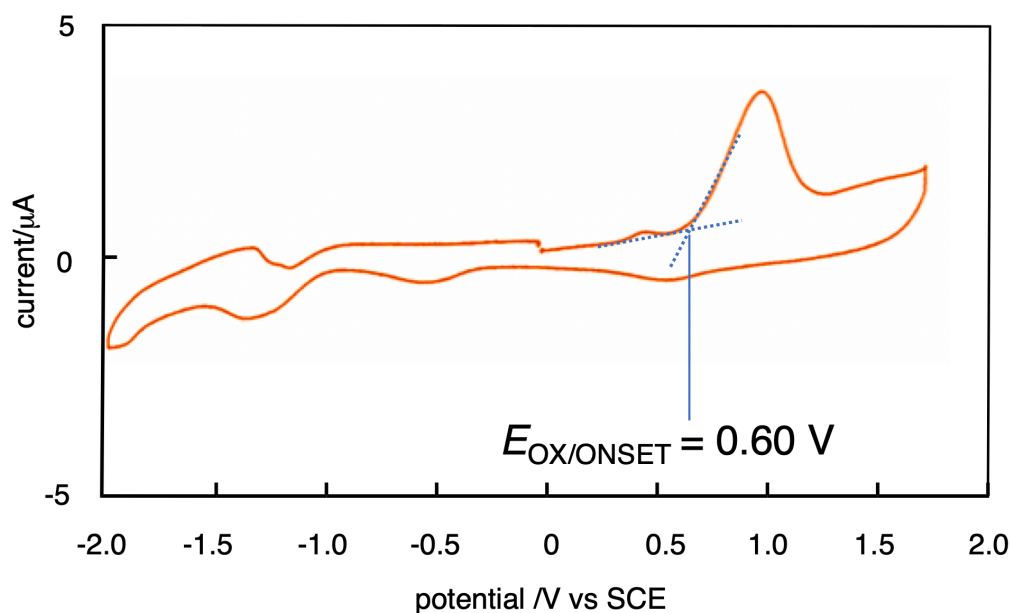

**Figure S58.** Cyclic voltammogram of **10b** in a dichloromethane solution at the Pt electrodes with  $[\text{Bu}_4\text{N}][\text{ClO}_4]$  (0.1 M) as the supporting electrolyte at a sweep rate of  $50 \text{ m Vs}^{-1}$ . Platinum was employed as the working electrode, and the potential scale was corrected with the standard redox potential of ferrocene ( $E = +0.380 \text{ V}$ ).

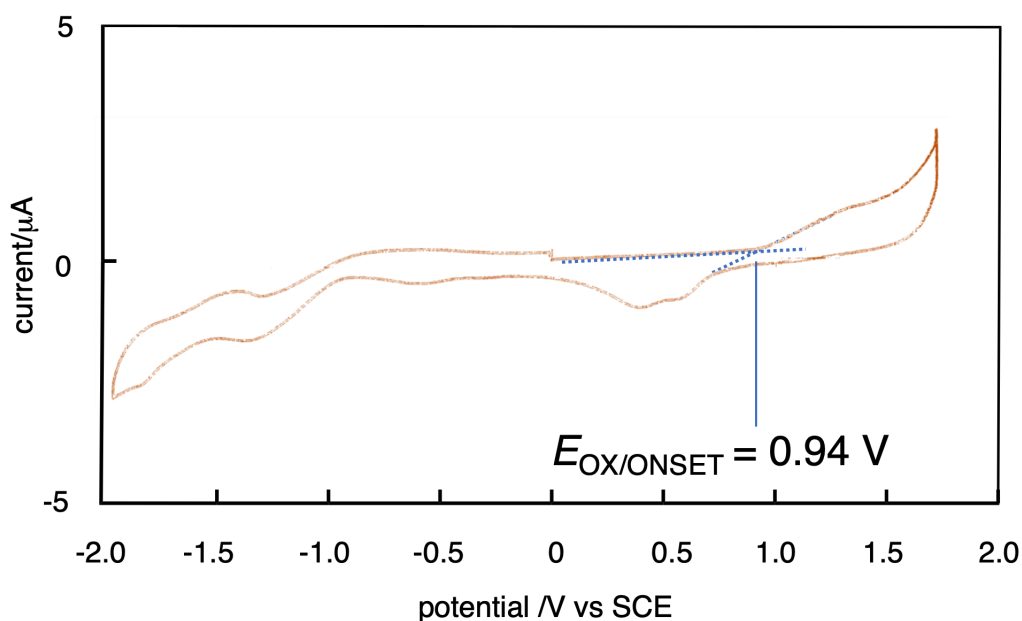

**Figure S59.** Cyclic voltammogram of **20a** in a dichloromethane solution at the Pt electrodes with  $[\text{Bu}_4\text{N}][\text{ClO}_4]$  (0.1 M) as the supporting electrolyte at a sweep rate of  $50 \text{ m Vs}^{-1}$ . Platinum was employed as the working electrode, and the potential scale was corrected with the standard redox potential of ferrocene ( $E = +0.380 \text{ V}$ ).

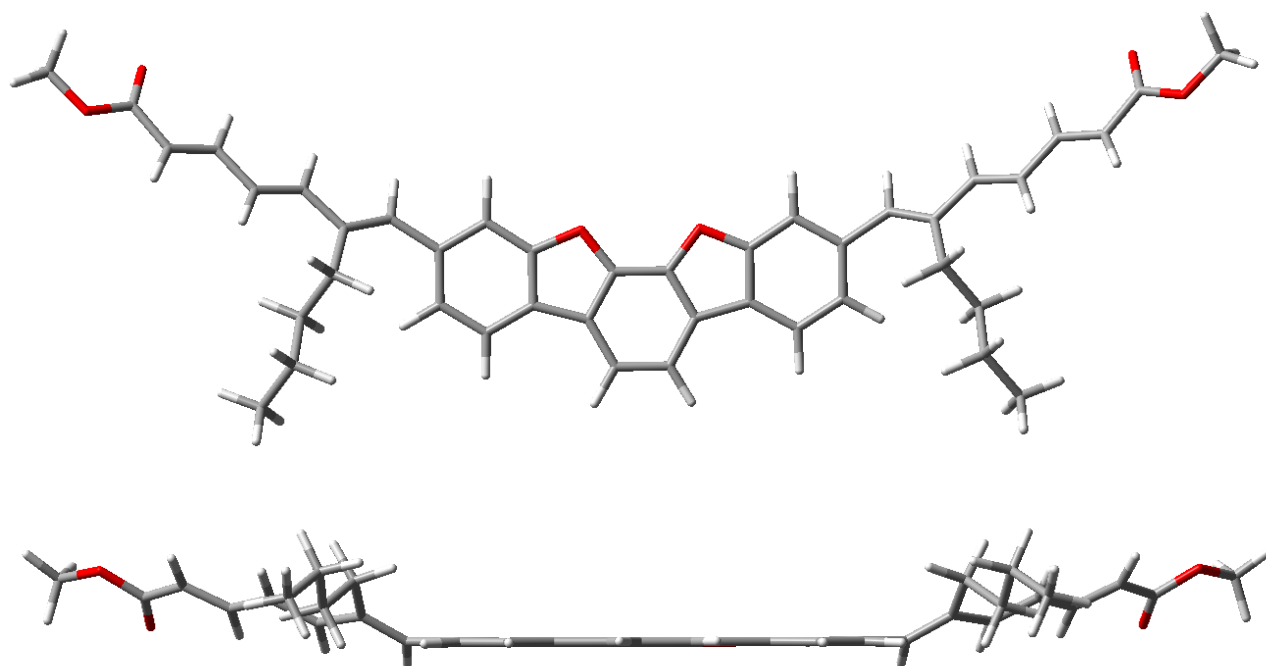

**Figure S60.** Top and side views of TD-DFT calculations of **9a** of isomer A (the most stable isomer).  $\Delta H^\circ = 0 \text{ kcal mol}^{-1}$ ,  $\Delta G^\circ = 0 \text{ kcal mol}^{-1}$ .

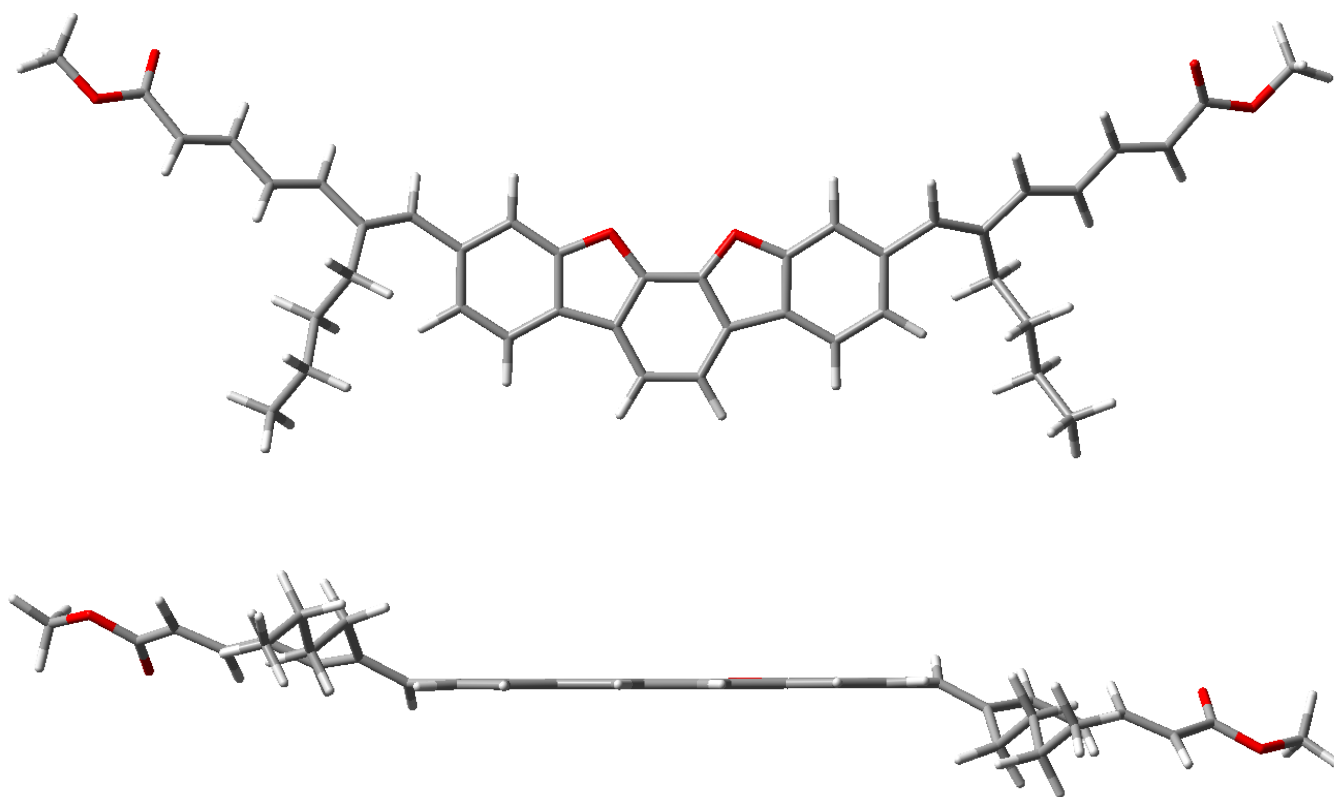

**Figure S61.** Top and side views of TD-DFT calculations of **9a** of isomer B (the second stable isomer).  $\Delta H^\circ = 0.064$  kcal mol<sup>-1</sup>,  $\Delta G^\circ = 0.087$  kcal mol<sup>-1</sup>.

LUMO+9 (181) 2.9646 eV

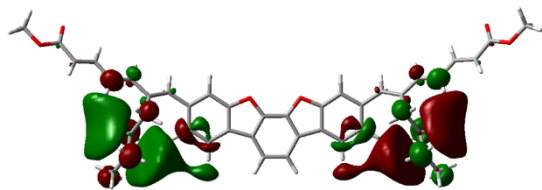

LUMO+8 (180) 2.7073 eV

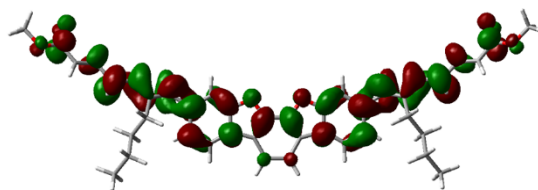

LUMO+7 (179) 2.1212 eV

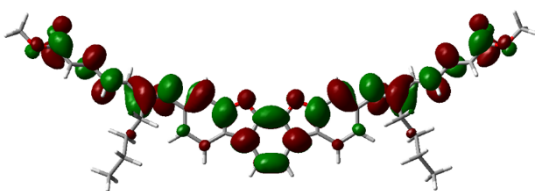

LUMO+6 (178) 1.7727 eV

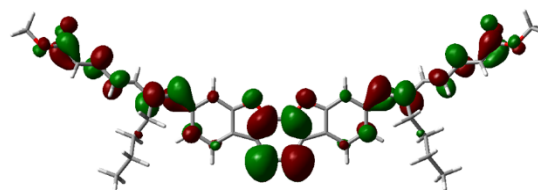

LUMO+5 (177) 1.5053 eV

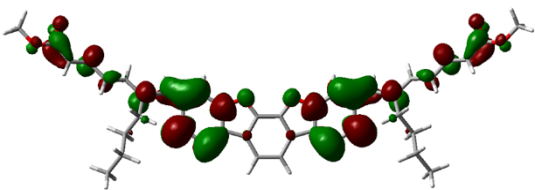

LUMO+4 (176) 1.4693 eV

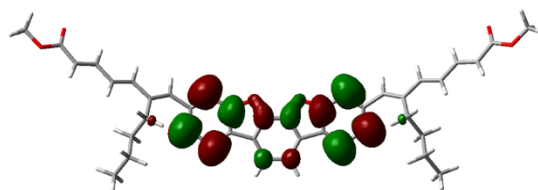

LUMO+3 (175) 1.0007 eV

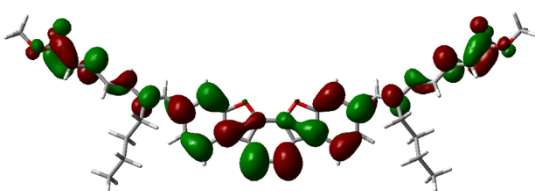

LUMO+2 (174) 0.3062 eV

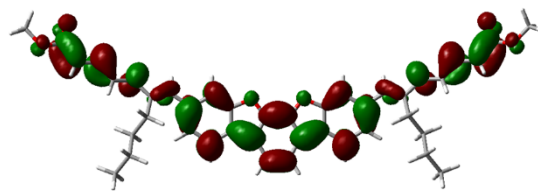

**Figure S62.** Selected orbitals by TD-DFT calculations of isomer A of **9a** in chloroform. Orbital numbers in parenthesis and orbital energy in eV.



LUMO+1 (173) -0.5349 eV

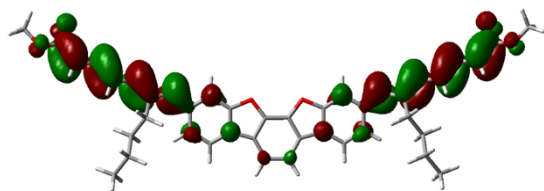

LUMO (172) -0.7634 eV

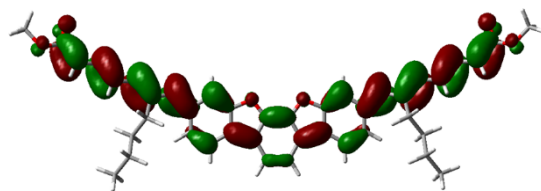

HOMO (171) -7.4018 eV

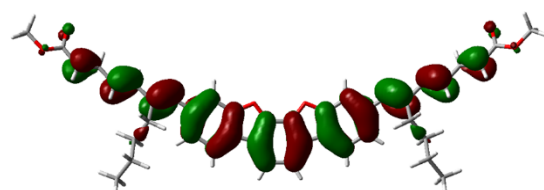

HOMO-1 (170) -7.8474 eV

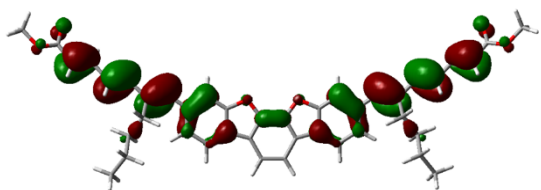

HOMO-2 (169) -8.3348 eV

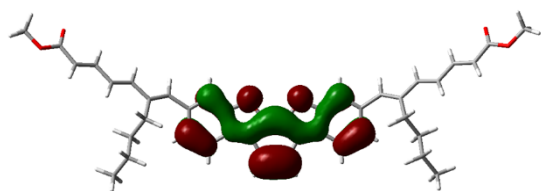

HOMO-3 (168) -8.5436 eV

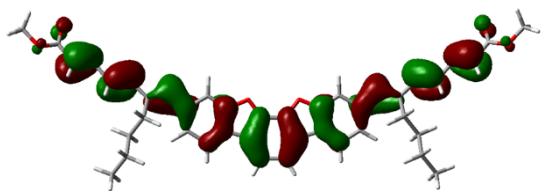

HOMO-4 (167) -9.0632 eV

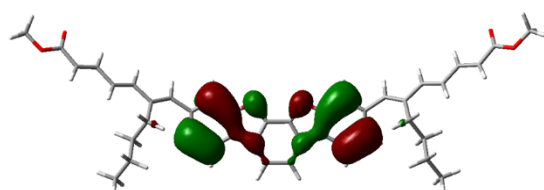

HOMO-5 (166) -9.4058 eV

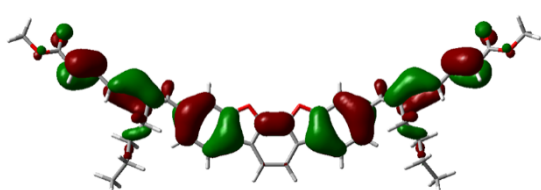

Figure S62. continued.

HOMO-6 (165) -9.6846 eV

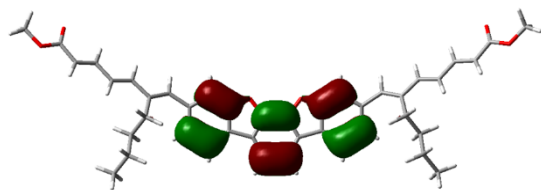

HOMO-7 (164) -9.9937 eV

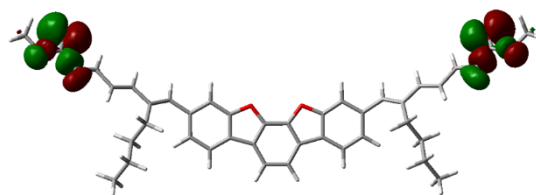

HOMO-8 (163) -9.9943 eV

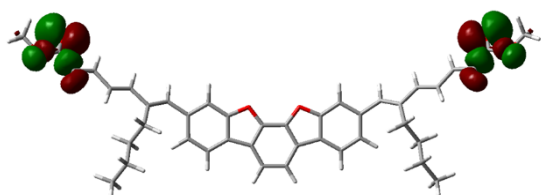

HOMO-9 (162) -10.0257 eV

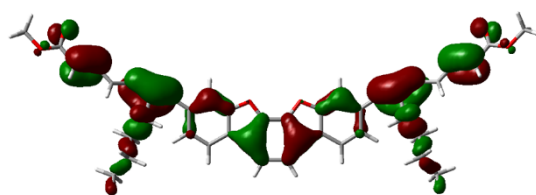

Figure S62. continued.

LUMO+9 (181) 2.9633 eV

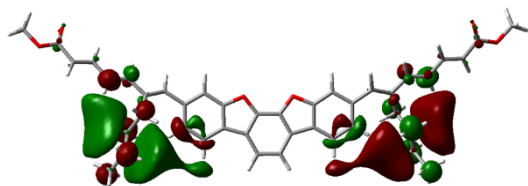

LUMO+8 (180) 2.7182 eV

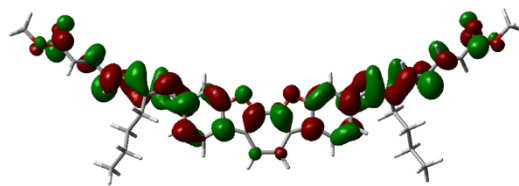

LUMO+7 (179) 2.1252 eV

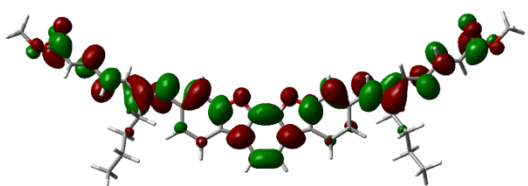

LUMO+6 (178) 1.7709 eV

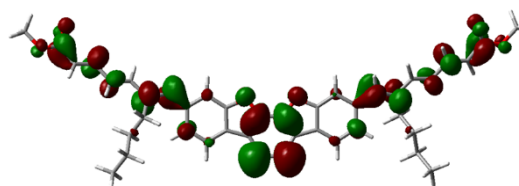

LUMO+5 (177) 1.5007 eV

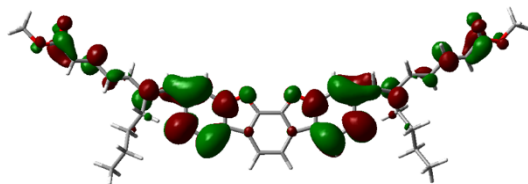

LUMO+4 (176) 1.4681 eV

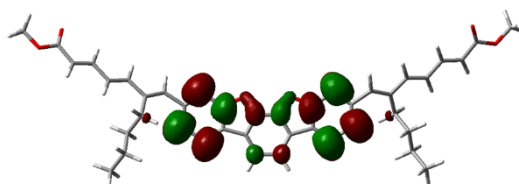

LUMO+3 (175) 1.0000 eV

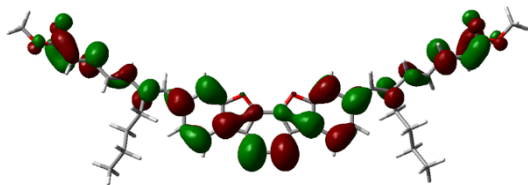

LUMO+2 (174) 0.3102 eV

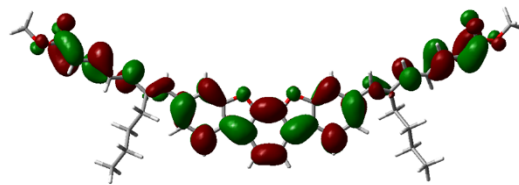

**Figure S63.** Selected orbitals by TD-DFT calculations of isomer B of **9a** in chloroform. Orbital numbers in parenthesis and orbital energy in eV.

LUMO+1 (173) -0.5380 eV

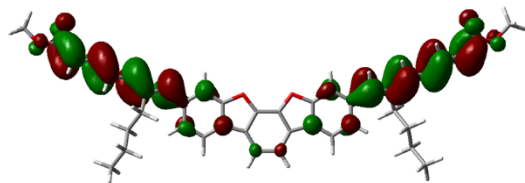

LUMO (172) -0.7704 eV

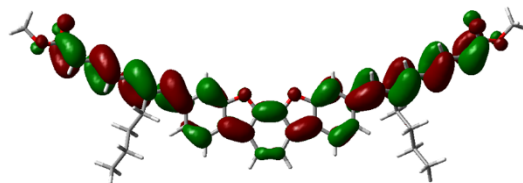

HOMO (171) -7.3948 eV

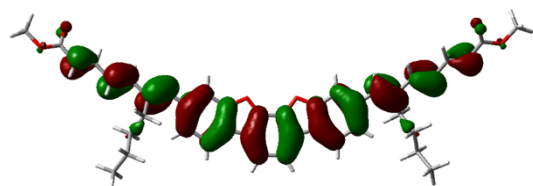

HOMO-1 (170) -7.8418 eV

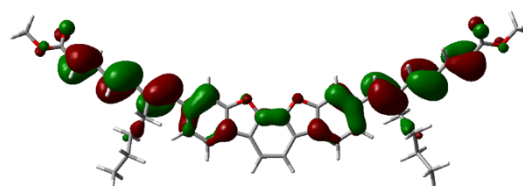

HOMO-2 (169) -8.3352 eV

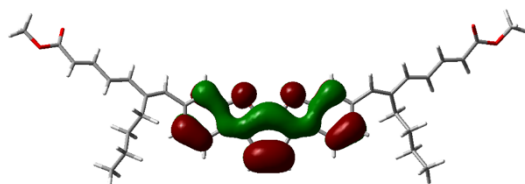

HOMO-3 (168) -8.5480 eV

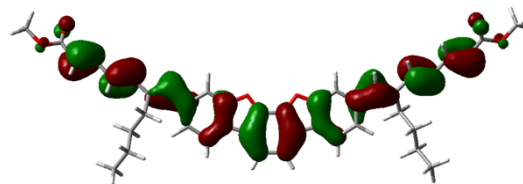

HOMO-4 (167) -9.0639 eV

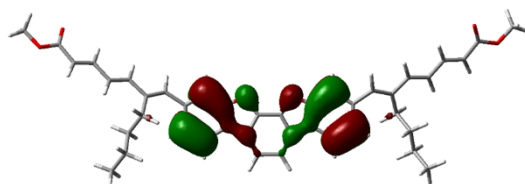

HOMO-5 (166) -9.4065 eV

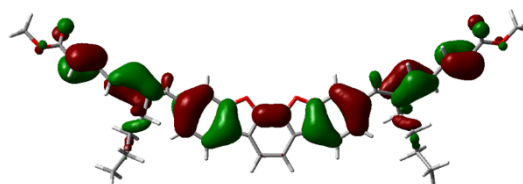

Figure S63. continued.

HOMO-6 (165) -9.6852 eV

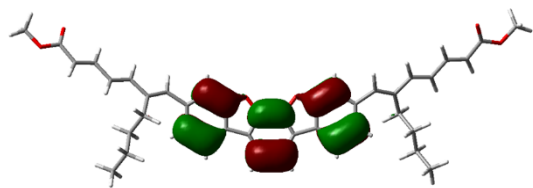

HOMO-7 (164) -9.9927 eV

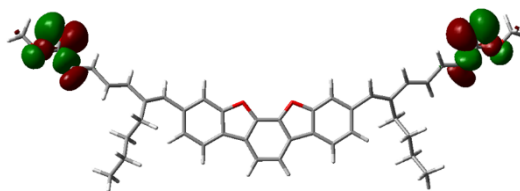

HOMO-8 (163) -9.9932 eV

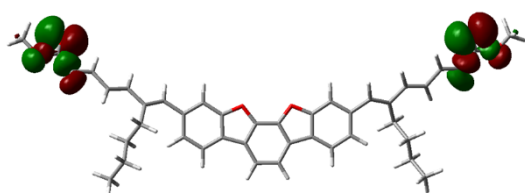

HOMO-9 (162) -10.0237 eV

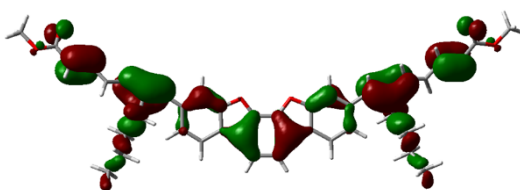

Figure S63. continued.

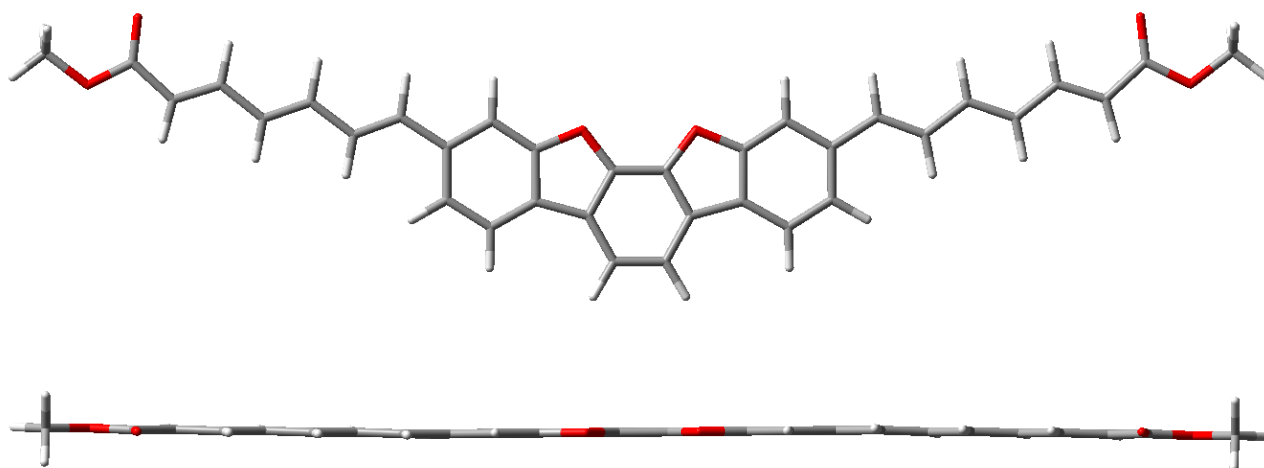Figure S64. Top and side views of TD-DFT calculations of **10b**.

LUMO+9 (149) 3.2453 eV

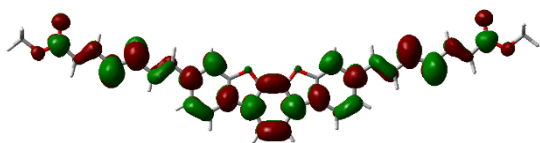

LUMO+8 (148) 2.9459 eV

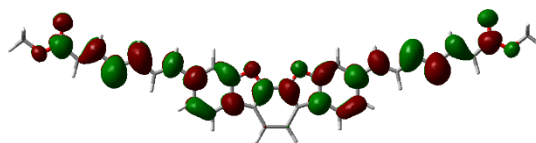

LUMO+7 (147) 2.2357 eV

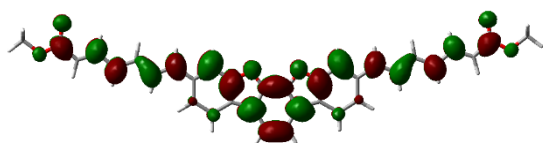

LUMO+6 (146) 1.7459 eV

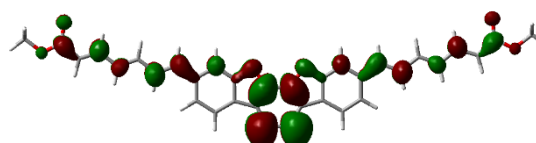

LUMO+5 (145) 1.4278 eV

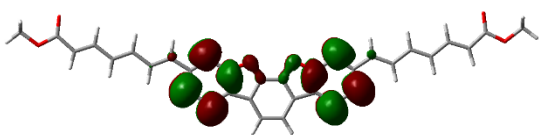

LUMO+4 (144) 1.3611 eV

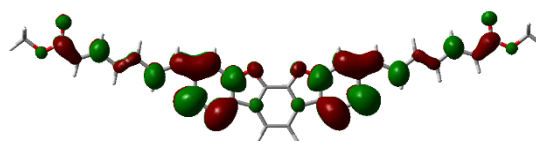

LUMO+3 (143) 0.9935 eV

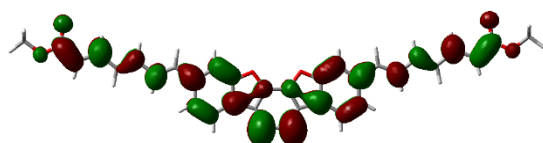

LUMO+2 (142) 0.3801 eV

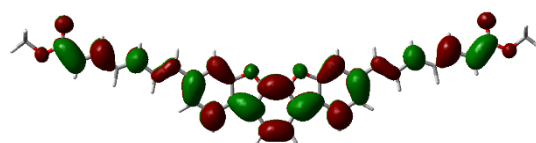

LUMO+1 (141) -0.6928 eV

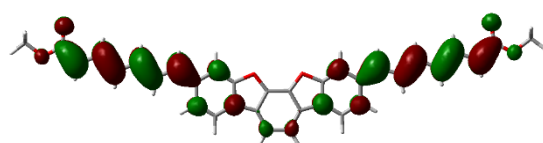

LUMO (140) -0.9546 eV

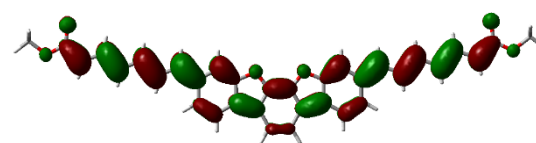

**Figure S65.** Selected orbitals by TD-DFT calculations of **10b** in chloroform. Orbital numbers in parenthesis and orbital energy in eV.



HOMO (139) -7.3104 eV

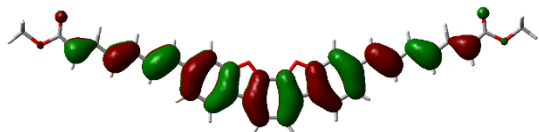

HOMO-1 (138) -7.8057 eV

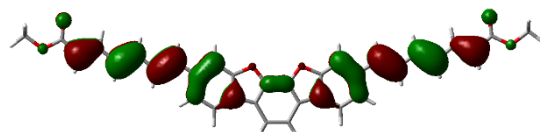

HOMO-2 (137) -8.3659 eV

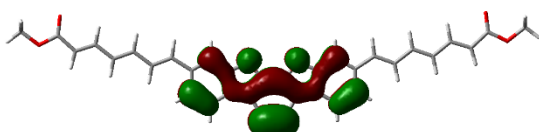

HOMO-3 (136) -8.6947 eV

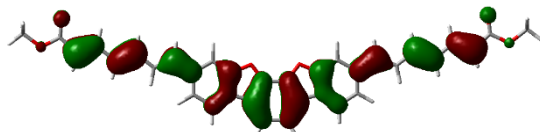

HOMO-4 (135) -9.1159 eV

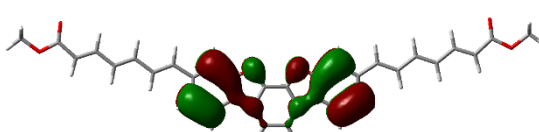

HOMO-5 (134) -9.5633 eV

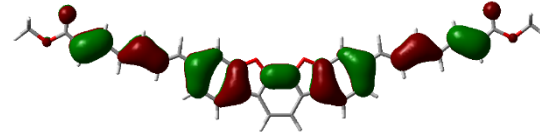

HOMO-6 (133) -9.7273 eV

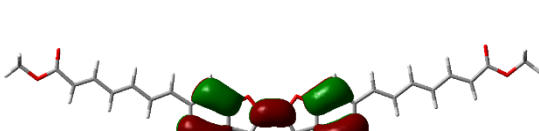

HOMO-7 (132) -10.0087 eV

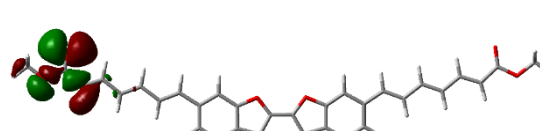

HOMO-8 (131) -10.0087 eV

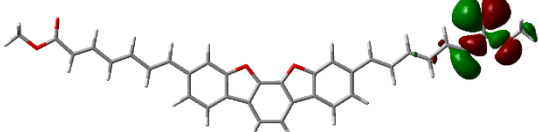

HOMO-9 (130) -10.2688 eV

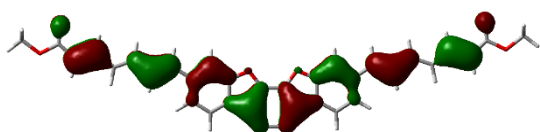

Figure S65. continued.

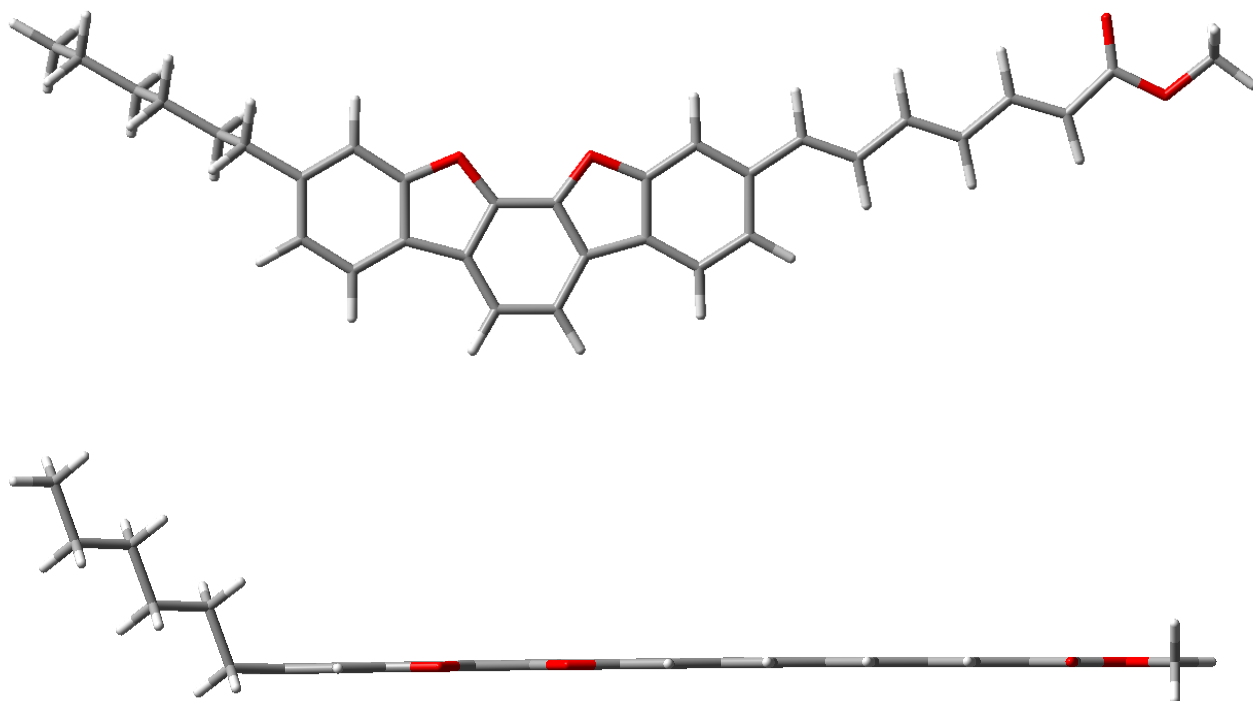

**Figure S66.** Top and side views of TD-DFT calculations of **21a**.

LUMO+9 (137) 3.2963 eV

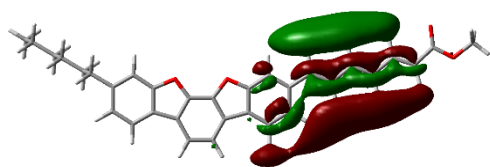

LUMO+8 (136) 3.2657 eV

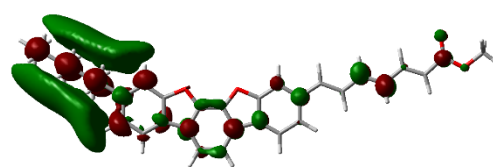

LUMO+7 (135) 3.2011 eV

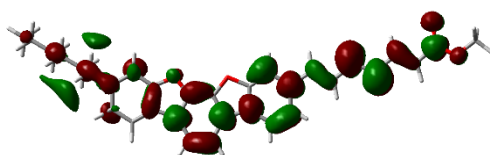

LUMO+6 (134) 2.6539 eV

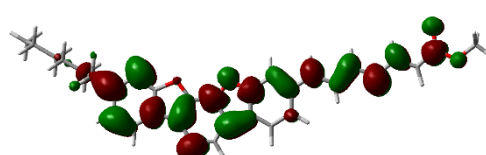

LUMO+5 (133) 1.9789 eV

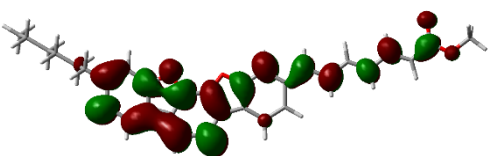

LUMO+4 (132) 1.6174 eV

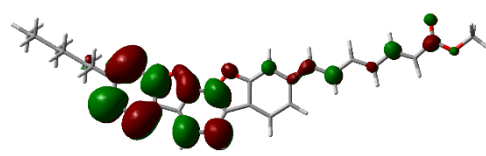

LUMO+3 (131) 1.4461 eV

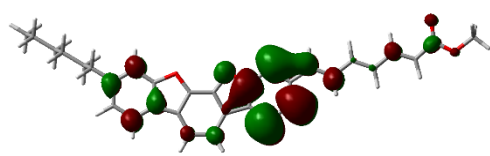

LUMO+2 (130) 1.0913 eV

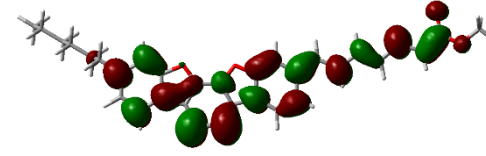

**Figure S67.** Selected orbitals by TD-DFT calculations of **21a** in chloroform. Orbital numbers in parenthesis and orbital energy in eV.

LUMO+1 (129) 0.3315 eV

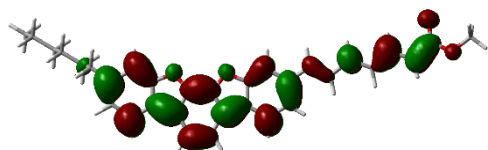

LUMO (128) -0.8205 eV

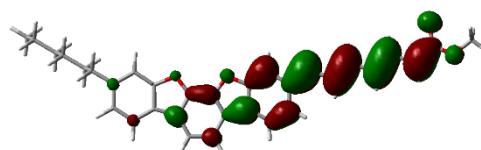

HOMO (127) -7.3991 eV

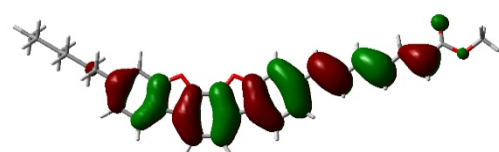

HOMO-1 (126) -8.2316 eV

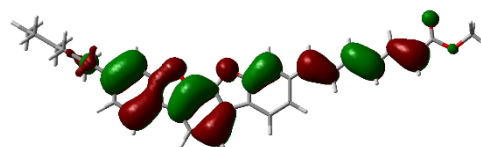

HOMO-2 (125) -8.2895 eV

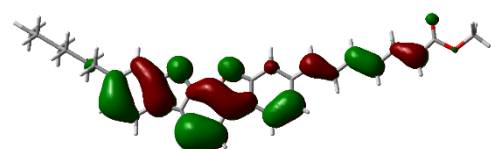

HOMO-3 (124) -9.0030 eV

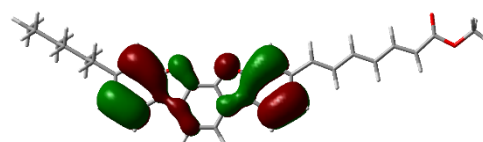

HOMO-4 (123) -9.3671 eV

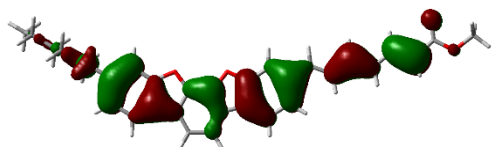

HOMO-5 (122) -9.6339 eV

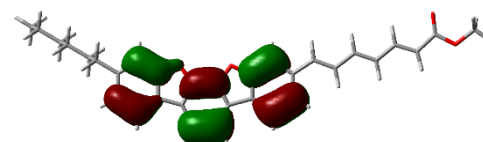

HOMO-6 (121) -10.0037 eV

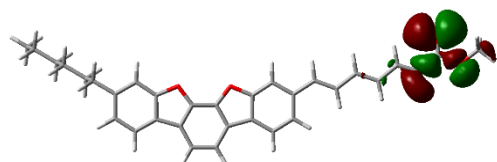

HOMO-7 (120) -10.2793 eV

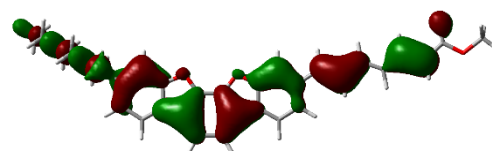

Figure S67. continued.

HOMO-8 (119) -10.6376 eV

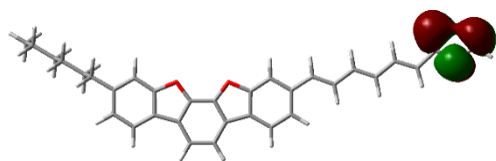

HOMO-9 (118) - -10.7496 eV

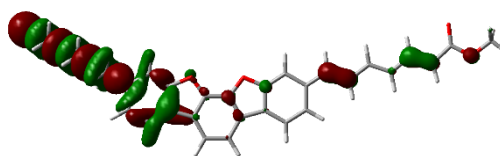

Figure S67. continued.

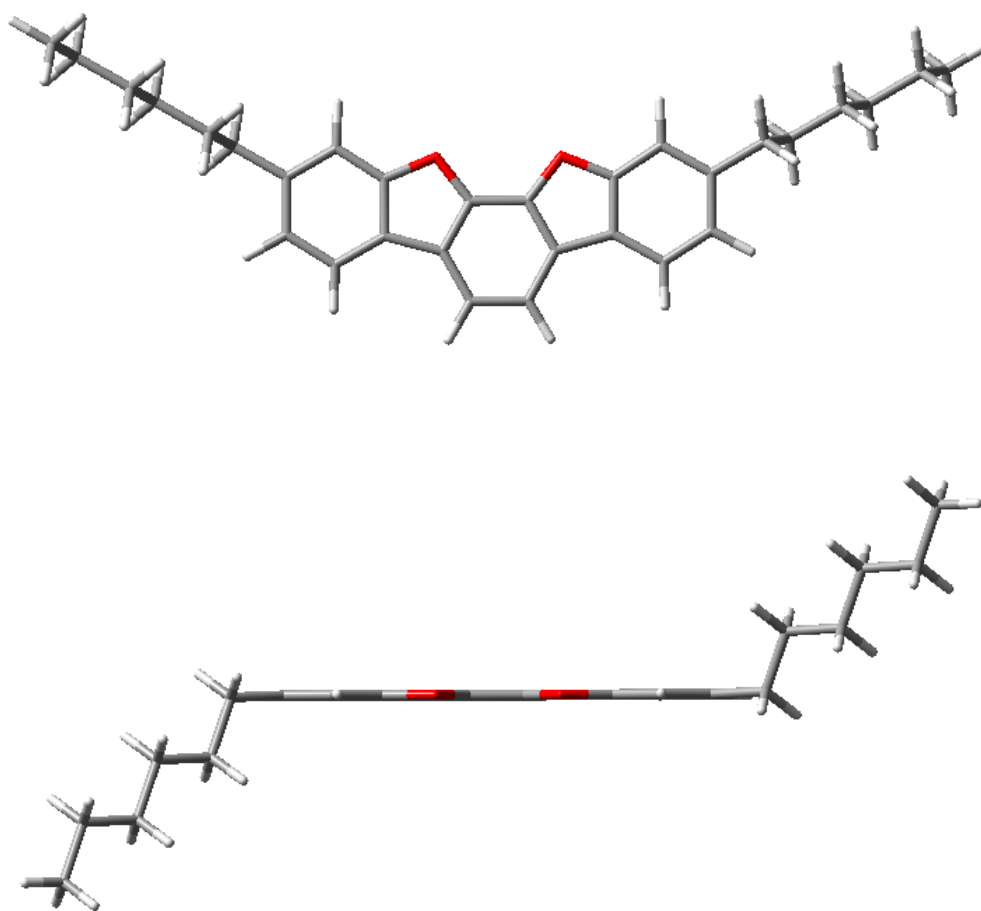

Figure S68. Top and side views of TD-DFT calculations of **22** of isomer A (The most stable isomer).  $\Delta H^\circ = 0 \text{ kcal mol}^{-1}$ ,  $\Delta G^\circ = 0 \text{ kcal mol}^{-1}$ .

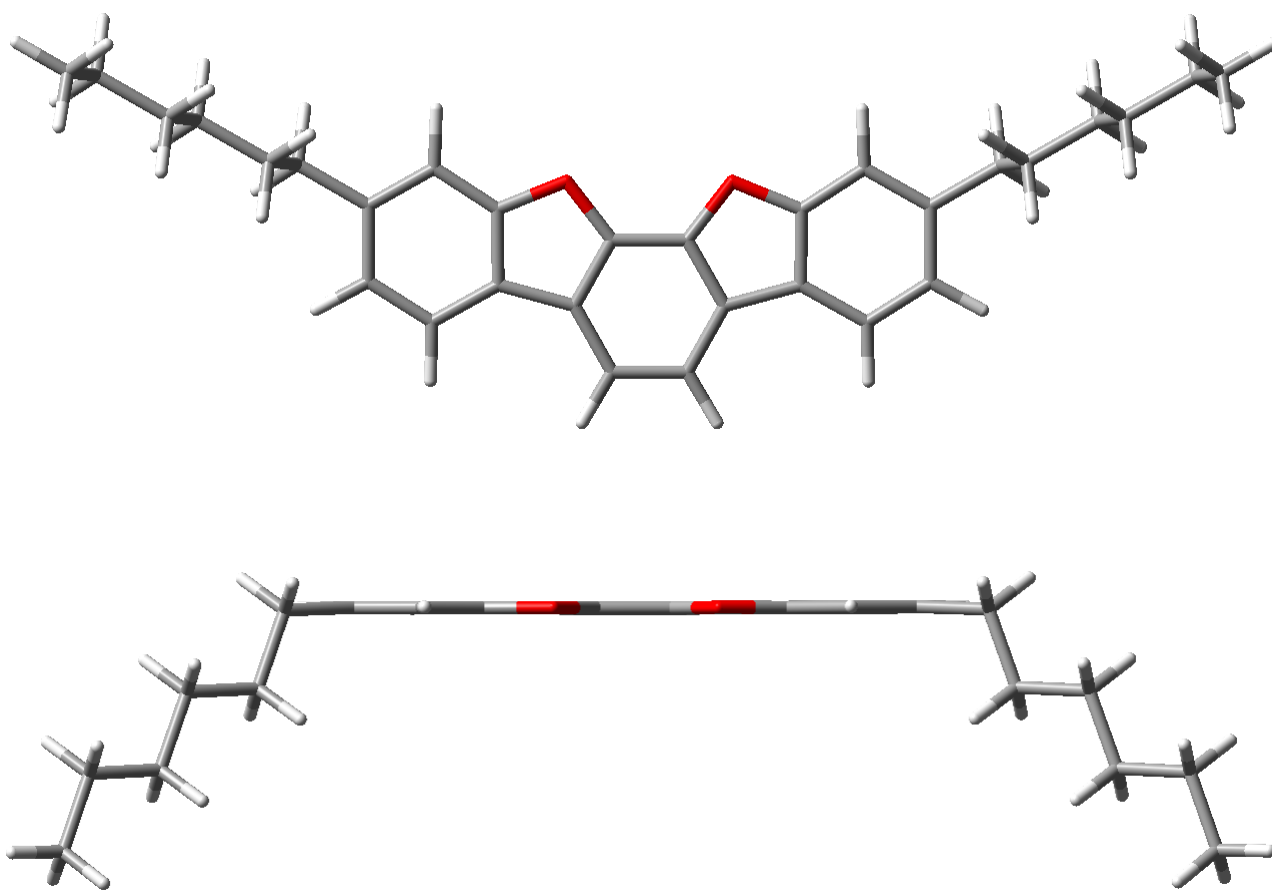

**Figure S69.** Top and side views of TD-DFT calculations of **22** of isomer B (The second stable isomer).  $\Delta H^\circ = 0.0446$  kcal mol<sup>-1</sup>,  $\Delta G^\circ = 0.612$  kcal mol<sup>-1</sup>.



LUMO+9 (125) 3.5540 eV

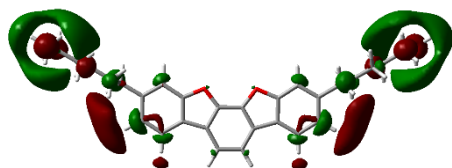

LUMO+8 (124) 3.5516 eV

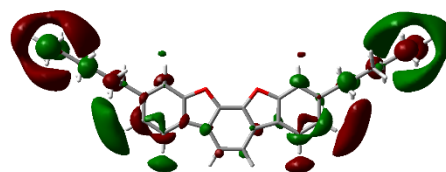

LUMO+7 (123) 3.2787 eV

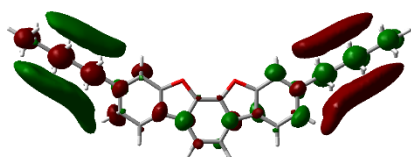

LUMO+6 (122) 3.2663 eV

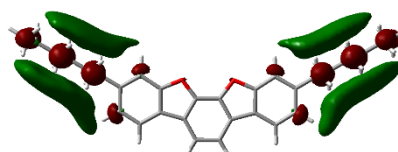

LUMO+5 (121) 3.0771 eV

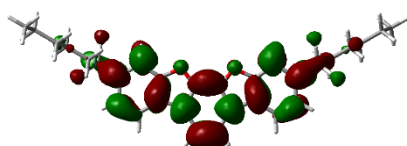

LUMO+4 (120) 2.3346 eV

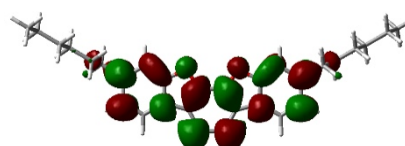

LUMO+3 (119) 1.7792 eV

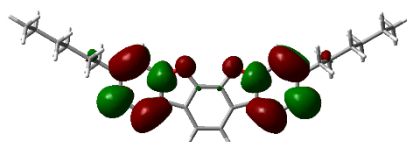

LUMO+2 (118) 1.6189 eV

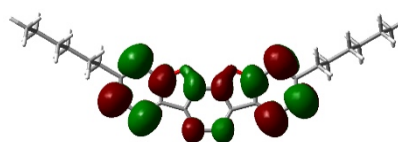

**Figure S70.** Selected orbitals by TD-DFT calculations of **22** (isomer A) in chloroform. Orbital numbers in parenthesis and orbital energy in eV.

LUMO+1 (117) 1.2561 eV

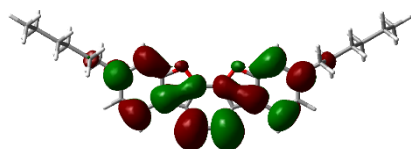

LUMO (116) 0.2730 eV

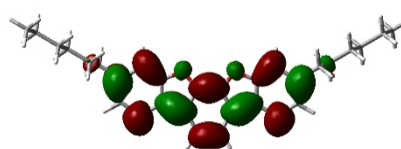

HOMO (115) -7.6477 eV

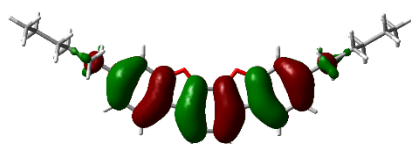

HOMO-1 (114) -8.1785 eV

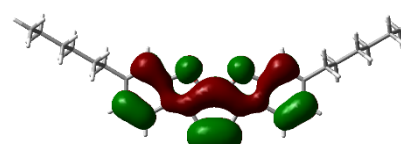

HOMO-2 (113) -8.8864 eV

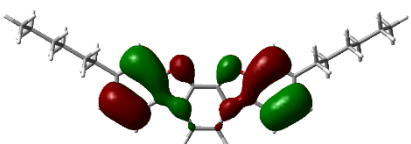

HOMO-3 (112) -9.0080 eV

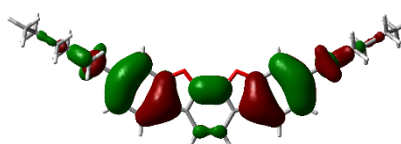

HOMO-4 (111) -9.5223 eV

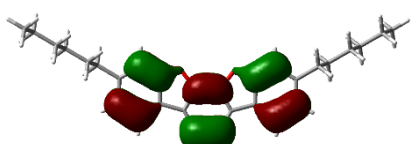

HOMO-5 (110) -10.2894 eV

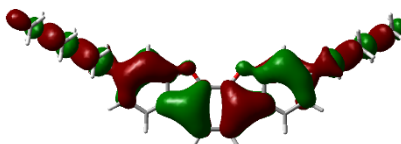

Figure S70. continued.

HOMO-6 (109) -10.7111 eV

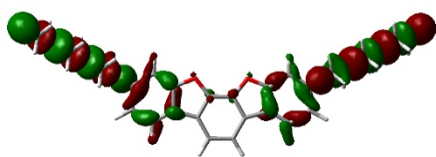

HOMO-7 (108) -10.8010 eV

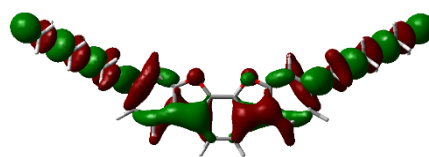

HOMO-8 (107) -10.9070 eV

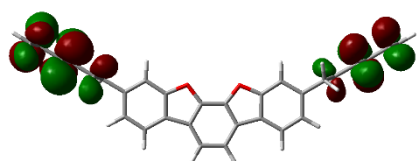

HOMO-9 (106) -10.9070 eV

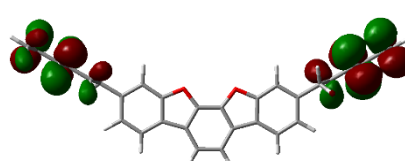

Figure S70. continued.

LUMO+9 (125) 3.5603 eV

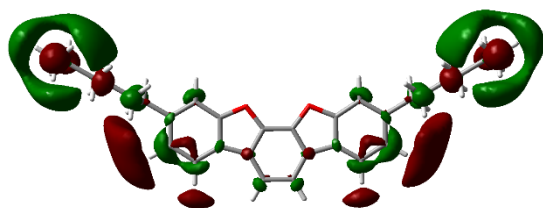

LUMO+8 (124) 3.5449 eV

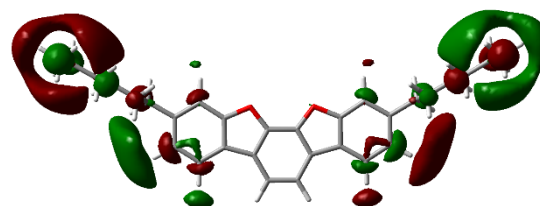

LUMO+7 (123) 3.2808 eV

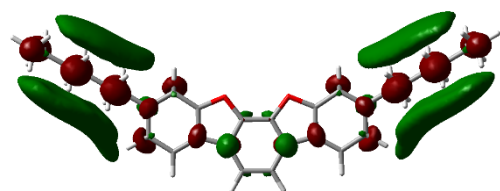

LUMO+6 (122) 3.2637 eV

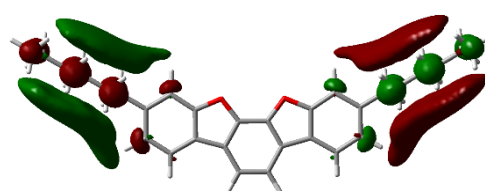

LUMO+5 (121) 3.0771 eV

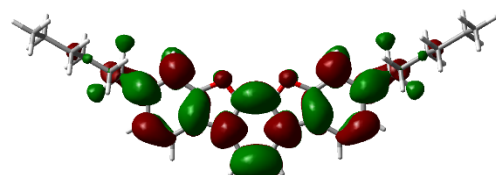

LUMO+4 (120) 2.3346 eV

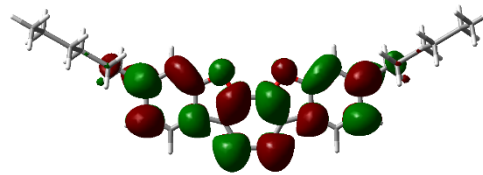

LUMO+3 (119) 1.7798 eV

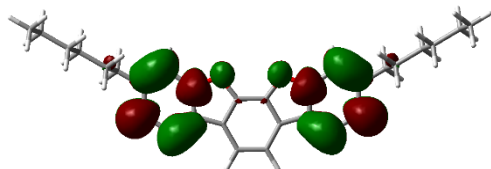

LUMO+2 (118) 1.6192 eV

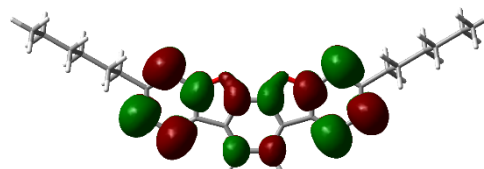

**Figure S71.** Selected orbitals by TD-DFT calculations of **22** (isomer B) in chloroform. Orbital numbers in parenthesis and orbital energy in eV.

LUMO+1 (117) 1.2561 eV

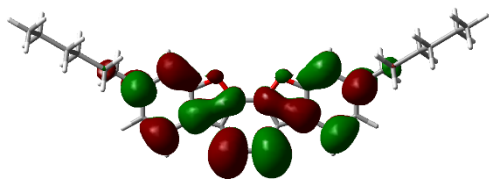

LUMO (116) 0.2727 eV

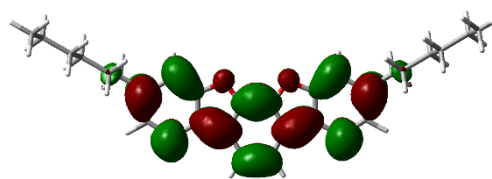

HOMO (115) -7.6479 eV

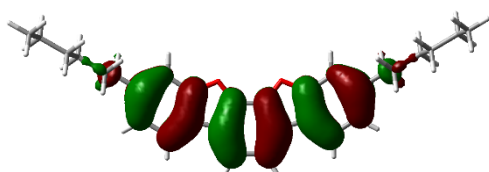

HOMO-1 (114) -8.1784 eV

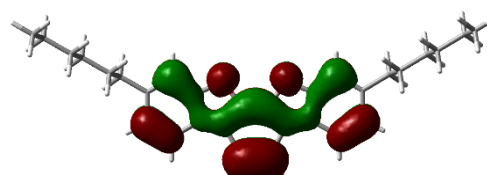

HOMO-2 (113) -8.8863 eV

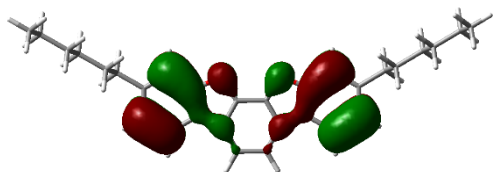

HOMO-3 (112) -9.0079 eV

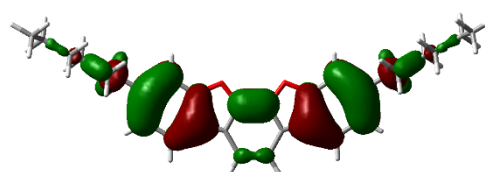

HOMO-4 (111) -9.5222 eV

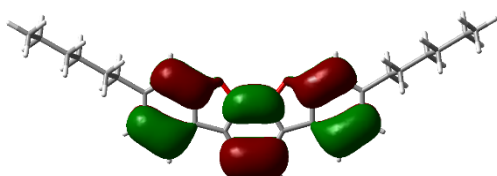

HOMO-5 (110) -10.2887 eV

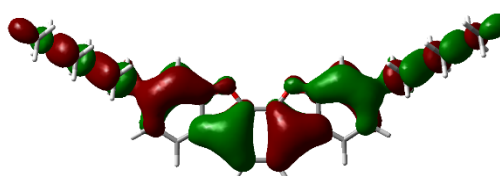

Figure S71. continued.

HOMO-6 (109) -10.7156 eV

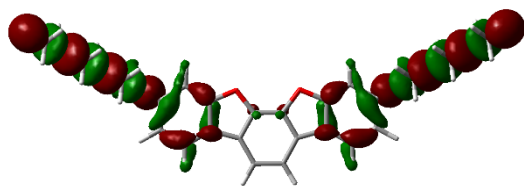

HOMO-7 (108) -10.7965 eV

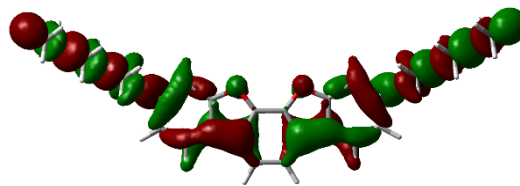

HOMO-8 (107) -10.9070 eV

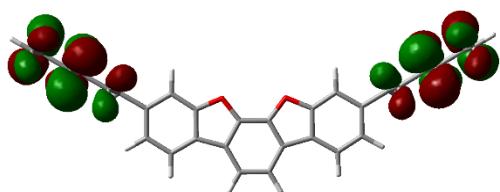

HOMO-9 (106) -10.9070 eV

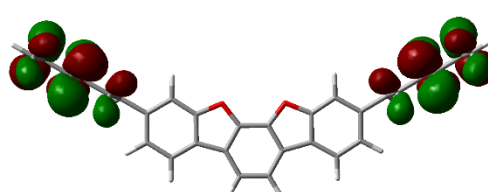

Figure S71. continued.

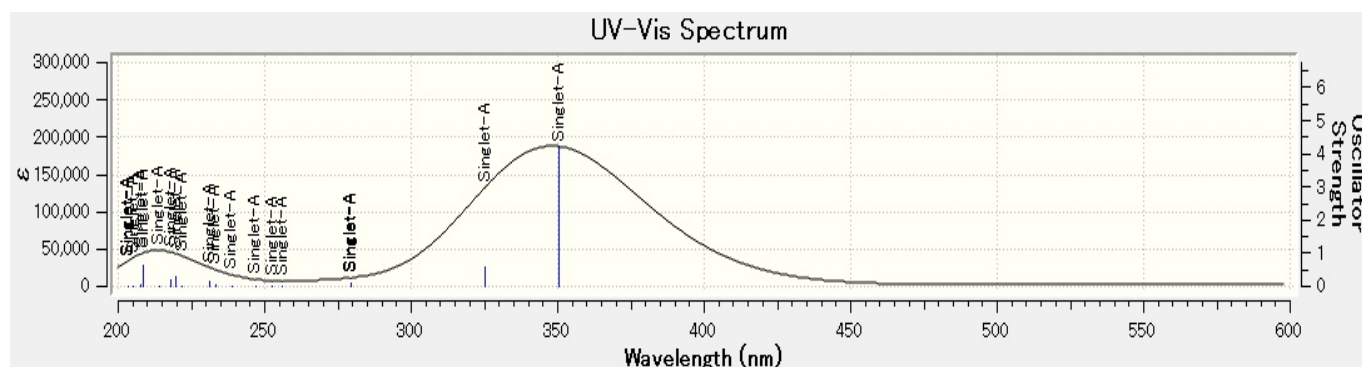Figure S72. Calculated Uv-vis spectrum of isomer A of **9a** in chloroform by TD-DFT.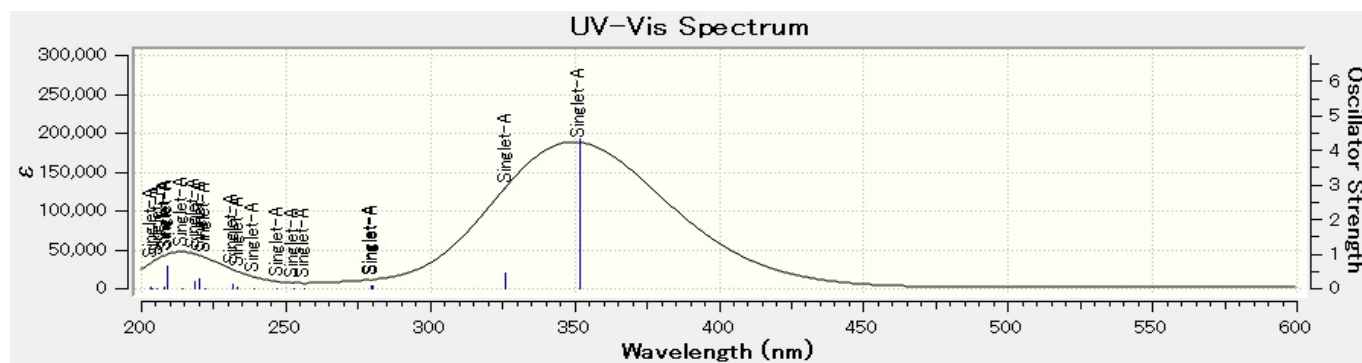Figure S73. Calculated Uv-vis spectrum of isomer B of **9a** in chloroform by TD-DFT.



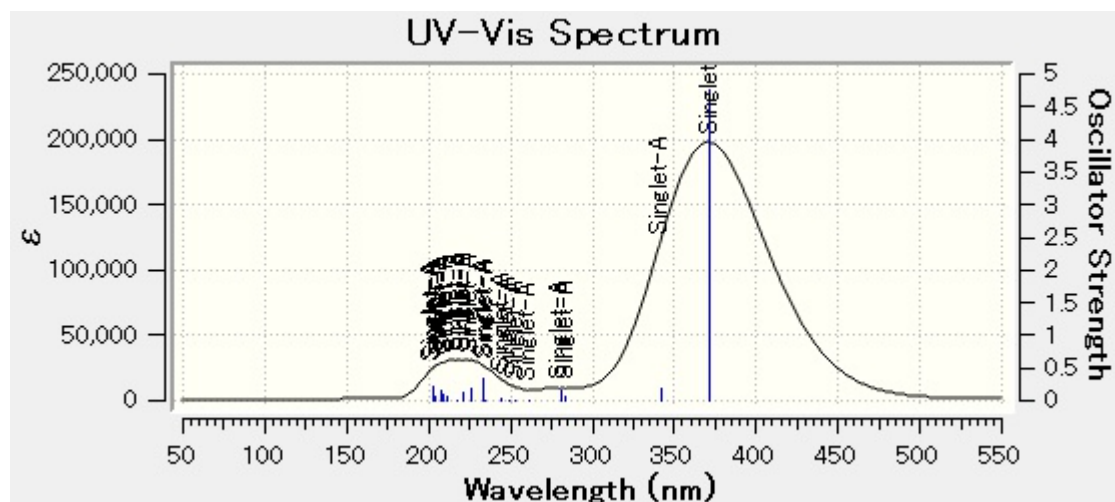

Figure S74. Calculated Uv-vis spectrum of **10b** in chloroform by TD-DFT.

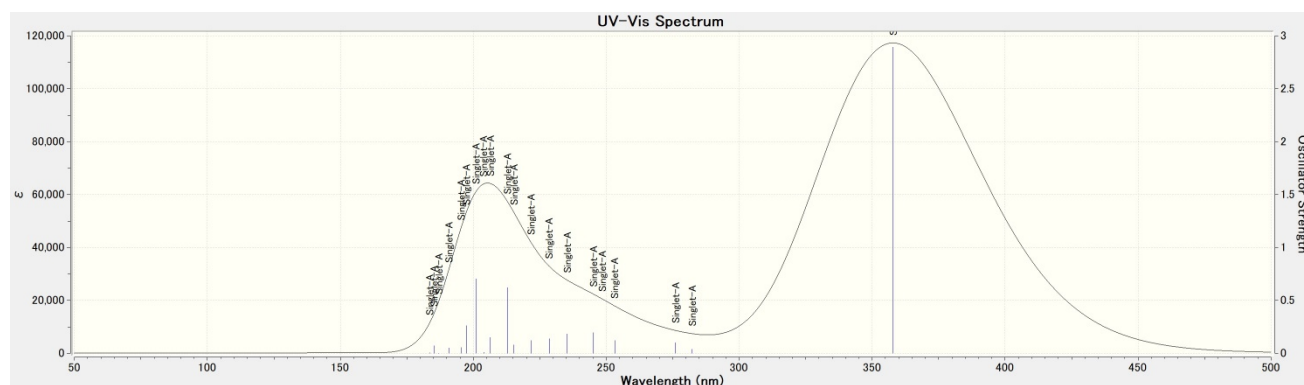

Figure S75. Calculated Uv-vis spectrum of **21a** in chloroform by TD-DFT.

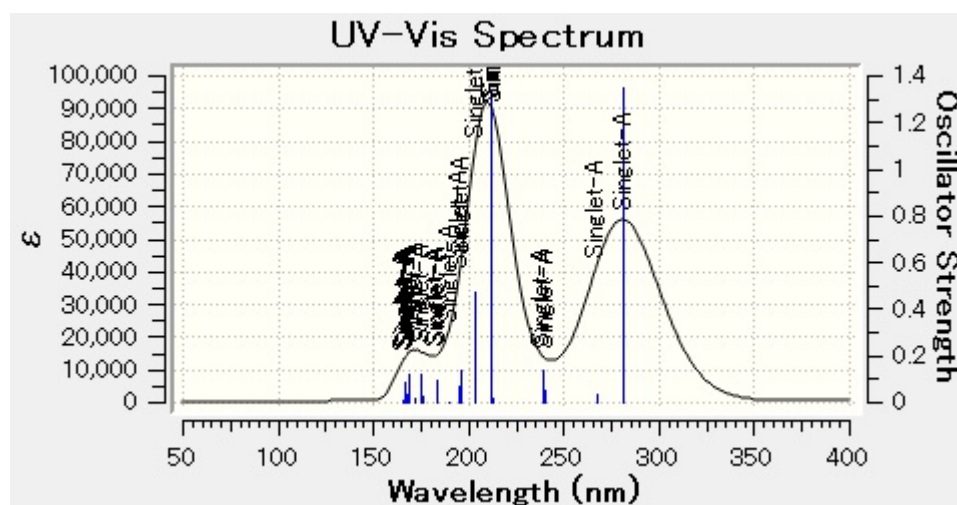

Figure S76. Calculated Uv-vis spectrum of isomer A of **22** in chloroform by TD-DFT.

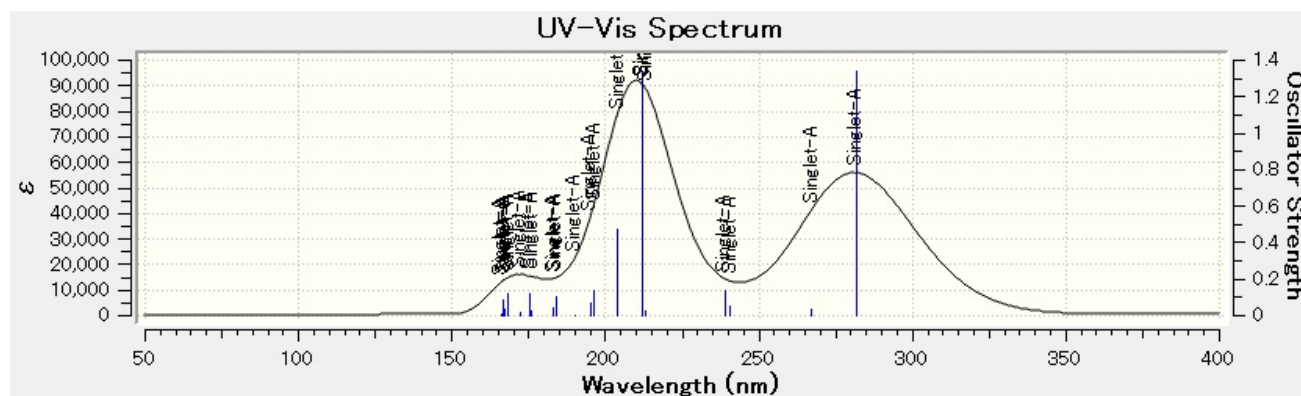

**Figure S77.** Calculated Uv-vis spectrum of isomer B of **22** in chloroform by TD-DFT.

**Table S1.** TD-DFT results for **9a** (isomer A) in chloroform.Excited State 1: 3.5379 eV 350.64 nm  $f=4.2221$ 

168 → 174 0.15609

170 → 173 0.35610

171 → 172 0.56382

171 → 174 -0.10574

Excited State 2: 3.8103 eV 325.39 nm  $f=0.5790$ 

168 → 173 0.16727

170 → 172 0.46452

171 → 173 0.46927

Excited State 3: 4.4334 eV 279.66 nm  $f=0.0922$ 

167 → 173 0.13847

167 → 175 -0.13052

169 → 172 0.48832

169 → 174 -0.35418

171 → 176 -0.18041

Excited State 4: 4.4392 eV 279.29 nm  $f=0.0609$ 

166 → 173 0.10254

167 → 172 0.11671

168 → 172 0.34349

169 → 175 -0.11723

170 → 173 0.30507

171 → 174 0.42207

Excited State 5: 4.8419 eV 256.06 nm  $f=0.0038$ 

165 → 173 -0.12192

166 → 176 -0.10575

167 → 172 0.38201

**Table S1.** continued.

|           |          |
|-----------|----------|
| 167 → 174 | -0.20274 |
| 168 → 172 | -0.18305 |
| 169 → 173 | 0.26417  |
| 169 → 175 | -0.18196 |
| 170 → 176 | 0.11602  |
| 171 → 177 | -0.22812 |

Excited State 6: 4.9087 eV 252.58 nm  $f=0.0181$

|           |          |
|-----------|----------|
| 165 → 172 | -0.15338 |
| 166 → 172 | 0.21967  |
| 167 → 173 | 0.13396  |
| 168 → 173 | 0.27203  |
| 170 → 174 | 0.26366  |
| 171 → 175 | 0.35763  |
| 171 → 176 | 0.15791  |

Excited State 7: 5.0206 eV 246.95 nm  $f=0.0002$

|           |          |
|-----------|----------|
| 163 → 172 | -0.24948 |
| 163 → 173 | -0.30009 |
| 163 → 174 | -0.18365 |
| 163 → 175 | -0.14125 |
| 164 → 172 | 0.26123  |
| 164 → 173 | 0.29368  |
| 164 → 174 | 0.19224  |
| 164 → 175 | 0.13347  |

Excited State 8: 5.0207 eV 246.95 nm  $f=0.0002$

|           |          |
|-----------|----------|
| 163 → 172 | -0.26354 |
| 163 → 173 | 0.28625  |
| 163 → 174 | -0.19401 |

**Table S1.** continued.

|           |          |
|-----------|----------|
| 163 → 175 | 0.13475  |
| 163 → 179 | -0.10010 |
| 164 → 172 | -0.24727 |
| 164 → 173 | 0.29735  |
| 164 → 174 | -0.18198 |
| 164 → 175 | 0.13990  |

Excited State 9: 5.1937 eV 238.72 nm  $f=0.0113$

|           |          |
|-----------|----------|
| 165 → 172 | -0.10813 |
| 166 → 172 | -0.15400 |
| 166 → 174 | -0.13325 |
| 168 → 173 | -0.30529 |
| 170 → 172 | -0.28870 |
| 170 → 174 | 0.21884  |
| 171 → 173 | 0.35037  |
| 171 → 176 | 0.14552  |

Excited State 10: 5.3162 eV 233.22 nm  $f=0.0424$

|           |          |
|-----------|----------|
| 162 → 173 | 0.10955  |
| 165 → 172 | 0.22881  |
| 165 → 174 | -0.15081 |
| 166 → 172 | 0.17196  |
| 167 → 173 | -0.13867 |
| 168 → 175 | 0.18629  |
| 169 → 174 | -0.12682 |
| 170 → 172 | -0.18937 |
| 170 → 174 | 0.31380  |
| 170 → 177 | 0.16748  |
| 171 → 173 | 0.11032  |
| 171 → 176 | -0.10365 |

**Table S1.** continued.

171 → 178      0.23435

Excited State 11: 5.3596 eV   231.33 nm   f=0.1345

166 → 173      -0.23913

167 → 172      -0.11778

168 → 172      -0.36329

169 → 173      -0.11854

170 → 175      0.19174

171 → 172      0.11058

171 → 174      0.40499

Excited State 12: 5.5851 eV   221.99 nm   f=0.0140

162 → 172      0.23650

165 → 175      0.10014

166 → 173      0.24321

167 → 172      0.15021

167 → 174      -0.10791

168 → 174      0.28713

169 → 173      -0.11851

169 → 175      0.16127

169 → 176      -0.12245

169 → 178      -0.17881

170 → 175      0.28445

171 → 179      0.19392

Excited State 13: 5.6404 eV   219.82 nm   f=0.3002

166 → 176      0.11302

168 → 172      -0.13076

168 → 174      0.15242

169 → 173      0.36688

**Table S1.** continued.

|           |          |
|-----------|----------|
| 169 → 175 | -0.21167 |
| 169 → 176 | 0.10456  |
| 170 → 175 | 0.13003  |
| 170 → 176 | -0.16057 |
| 170 → 178 | 0.12354  |
| 171 → 177 | 0.36679  |

Excited State 14: 5.6869 eV 218.02 nm  $f=0.2181$

|           |          |
|-----------|----------|
| 162 → 173 | 0.10320  |
| 166 → 172 | 0.20204  |
| 168 → 178 | -0.16425 |
| 169 → 172 | -0.26610 |
| 170 → 177 | -0.20147 |
| 171 → 175 | -0.30581 |
| 171 → 176 | 0.36729  |
| 171 → 178 | 0.13134  |

Excited State 15: 5.7949 eV 213.95 nm  $f=0.0001$

|           |          |
|-----------|----------|
| 162 → 173 | 0.10705  |
| 165 → 172 | -0.25009 |
| 166 → 172 | 0.17251  |
| 167 → 173 | 0.29844  |
| 169 → 172 | 0.11933  |
| 169 → 174 | 0.21731  |
| 169 → 177 | -0.10336 |
| 170 → 172 | -0.10259 |
| 170 → 177 | 0.11256  |
| 171 → 173 | 0.10242  |
| 171 → 175 | -0.23204 |
| 171 → 176 | -0.25980 |



**Table S1.** continued.

171 → 178      0.11915

Excited State 16: 5.9410 eV   208.69 nm   f=0.6529

162 → 172      -0.17585

166 → 173      -0.15060

167 → 172      0.24130

167 → 174      -0.22827

167 → 177      0.14487

168 → 174      -0.14238

169 → 173      -0.16087

169 → 175      0.10215

169 → 176      -0.24285

170 → 176      -0.23070

171 → 177      0.26862

171 → 179      -0.12959

Excited State 17: 5.9641 eV   207.88 nm   f=0.0335

161 → 172      -0.15452

162 → 173      -0.24740

165 → 174      -0.10408

166 → 172      -0.24380

167 → 173      0.12264

167 → 176      0.17261

168 → 178      -0.11458

169 → 174      0.20820

169 → 177      -0.20545

170 → 172      0.14318

170 → 174      0.10358

171 → 173      -0.13450

171 → 178      0.27393

**Table S1.** continued.

171 → 180      0.11525

Excited State 18: 6.0440 eV   205.14 nm   f=0.0012

162 → 172      -0.11998

166 → 173      -0.17251

168 → 172      -0.13428

168 → 174      0.18887

169 → 175      0.12252

169 → 178      -0.12580

170 → 173      0.40293

171 → 172      -0.34965

171 → 174      -0.12939

Excited State 19: 6.0902 eV   203.58 nm   f=0.0221

161 → 172      0.13576

165 → 172      -0.20427

165 → 174      0.17596

166 → 172      -0.12400

166 → 174      0.15889

167 → 175      -0.11172

167 → 176      -0.16777

168 → 175      0.21619

169 → 172      -0.19066

169 → 174      -0.12442

169 → 177      0.17656

170 → 177      0.16336

170 → 179      0.18051

171 → 173      -0.13707

171 → 178      0.23007

**Table S1.** continued.Excited State 20: 6.0970 eV 203.35 nm  $f=0.0148$ 

|           |          |
|-----------|----------|
| 161 → 173 | -0.18095 |
| 162 → 172 | -0.20633 |
| 165 → 173 | -0.18467 |
| 166 → 175 | -0.10297 |
| 167 → 172 | 0.14504  |
| 167 → 174 | 0.18755  |
| 167 → 177 | -0.20855 |
| 169 → 175 | 0.26820  |
| 169 → 176 | 0.27108  |
| 169 → 178 | -0.17000 |
| 170 → 173 | -0.10458 |
| 171 → 172 | 0.10462  |

**Table S2.** TD-DFT results for **9a** (isomer B) in chloroform.Excited State 1: 3.5256 eV 351.66 nm  $f=4.3226$ 

|           |          |
|-----------|----------|
| 168 → 174 | -0.15513 |
| 170 → 173 | 0.35567  |
| 171 → 172 | 0.56494  |
| 171 → 174 | -0.10405 |

Excited State 2: 3.8016 eV 326.14 nm  $f=0.4673$ 

|           |          |
|-----------|----------|
| 168 → 173 | -0.16495 |
| 170 → 172 | 0.46455  |
| 171 → 173 | 0.47020  |

Excited State 3: 4.4295 eV 279.91 nm  $f=0.0908$ 

|           |          |
|-----------|----------|
| 167 → 173 | 0.13982  |
| 167 → 175 | 0.13003  |
| 169 → 172 | 0.49051  |
| 169 → 174 | -0.35138 |
| 171 → 176 | 0.17977  |

Excited State 4: 4.4374 eV 279.41 nm  $f=0.0857$ 

|           |          |
|-----------|----------|
| 166 → 173 | 0.10227  |
| 167 → 172 | 0.11871  |
| 168 → 172 | -0.34283 |
| 169 → 175 | 0.11755  |
| 170 → 173 | 0.30511  |
| 171 → 174 | 0.42105  |

Excited State 5: 4.8368 eV 256.34 nm  $f=0.0063$ 

|           |          |
|-----------|----------|
| 165 → 173 | -0.12231 |
| 166 → 176 | -0.10473 |
| 167 → 172 | 0.38250  |

**Table S2.** continued.

|           |          |
|-----------|----------|
| 167 → 174 | -0.20036 |
| 168 → 172 | 0.18484  |
| 169 → 173 | 0.26510  |
| 169 → 175 | 0.18028  |
| 170 → 176 | 0.11663  |
| 171 → 177 | -0.22755 |

Excited State 6: 4.9063 eV 252.70 nm  $f=0.0146$

|           |          |
|-----------|----------|
| 165 → 172 | 0.15488  |
| 166 → 172 | -0.21888 |
| 167 → 173 | -0.13483 |
| 168 → 173 | 0.27210  |
| 170 → 174 | -0.26404 |
| 171 → 175 | 0.35658  |
| 171 → 176 | -0.15935 |

Excited State 7: 5.0206 eV 246.95 nm  $f=0.0002$

|           |          |
|-----------|----------|
| 163 → 172 | 0.24811  |
| 163 → 173 | 0.26992  |
| 163 → 174 | 0.18371  |
| 163 → 175 | -0.12850 |
| 164 → 172 | 0.26628  |
| 164 → 173 | 0.31200  |
| 164 → 174 | 0.19416  |
| 164 → 175 | -0.14848 |
| 164 → 178 | -0.10035 |

Excited State 8: 5.0206 eV 246.95 nm  $f=0.0002$

**Table S2.** continued.

|           |          |
|-----------|----------|
| 163 → 172 | -0.26393 |
| 163 → 173 | 0.31398  |
| 163 → 174 | -0.19541 |
| 163 → 175 | -0.14948 |
| 163 → 178 | -0.10104 |
| 164 → 172 | 0.24623  |
| 164 → 173 | -0.26775 |
| 164 → 174 | 0.18226  |
| 164 → 175 | 0.12178  |

Excited State 9: 5.1881 eV 238.98 nm  $f=0.0099$

|           |          |
|-----------|----------|
| 165 → 172 | -0.10611 |
| 166 → 172 | -0.15102 |
| 166 → 174 | -0.13252 |
| 168 → 173 | 0.30399  |
| 170 → 172 | -0.29345 |
| 170 → 174 | 0.22119  |
| 171 → 173 | 0.35160  |
| 171 → 176 | 0.14528  |

Excited State 10: 5.3114 eV 233.43 nm  $f=0.0412$

|           |          |
|-----------|----------|
| 162 → 173 | -0.11115 |
| 165 → 172 | 0.22973  |
| 165 → 174 | -0.15007 |
| 166 → 172 | 0.17480  |
| 167 → 173 | -0.13876 |
| 168 → 175 | 0.18446  |
| 169 → 174 | -0.12715 |

**Table S2.** continued.

|           |          |
|-----------|----------|
| 170 → 172 | -0.18686 |
| 170 → 174 | 0.31052  |
| 170 → 177 | 0.17004  |
| 171 → 173 | 0.10825  |
| 171 → 176 | -0.10837 |
| 171 → 178 | -0.23458 |

Excited State 11: 5.3571 eV 231.44 nm  $f=0.1375$

|           |          |
|-----------|----------|
| 166 → 173 | -0.23800 |
| 167 → 172 | -0.11730 |
| 168 → 172 | 0.36364  |
| 169 → 173 | -0.11969 |
| 170 → 175 | 0.19337  |
| 171 → 172 | 0.10796  |
| 171 → 174 | 0.40521  |

Excited State 12: 5.5830 eV 222.07 nm  $f=0.0156$

|           |          |
|-----------|----------|
| 162 → 172 | 0.23843  |
| 166 → 173 | -0.24544 |
| 167 → 172 | -0.15390 |
| 167 → 174 | 0.10715  |
| 168 → 174 | 0.28547  |
| 169 → 173 | 0.11534  |
| 169 → 175 | 0.15832  |
| 169 → 176 | 0.11889  |
| 169 → 178 | -0.17911 |
| 170 → 175 | 0.28519  |
| 171 → 179 | -0.19236 |

Excited State 13: 5.6348 eV 220.03 nm  $f=0.2995$



**Table S2.** continued.

|           |          |
|-----------|----------|
| 166 → 176 | 0.11280  |
| 168 → 172 | 0.13064  |
| 168 → 174 | -0.14675 |
| 169 → 173 | 0.36773  |
| 169 → 175 | 0.21238  |
| 169 → 176 | 0.10385  |
| 170 → 175 | -0.12805 |
| 170 → 176 | -0.16401 |
| 170 → 178 | -0.12210 |
| 171 → 177 | 0.36822  |

Excited State 14: 5.6823 eV 218.20 nm  $f=0.2135$

|           |          |
|-----------|----------|
| 162 → 173 | -0.10619 |
| 166 → 172 | 0.20604  |
| 168 → 173 | -0.10049 |
| 168 → 178 | -0.16482 |
| 169 → 172 | -0.26429 |
| 170 → 177 | -0.20238 |
| 171 → 175 | 0.30733  |
| 171 → 176 | 0.36373  |
| 171 → 178 | -0.13257 |

Excited State 15: 5.7909 eV 214.10 nm  $f=0.0002$

|           |          |
|-----------|----------|
| 162 → 173 | -0.10906 |
| 165 → 172 | -0.25139 |
| 166 → 172 | 0.17481  |
| 167 → 173 | 0.29699  |
| 169 → 172 | 0.11699  |
| 169 → 174 | 0.21384  |
| 169 → 177 | -0.10224 |

**Table S2.** continued.

|           |          |
|-----------|----------|
| 170 → 172 | -0.10353 |
| 170 → 177 | 0.11353  |
| 171 → 173 | 0.10446  |
| 171 → 175 | 0.23056  |
| 171 → 176 | -0.26419 |
| 171 → 178 | -0.11497 |

Excited State 16: 5.9380 eV 208.80 nm  $f=0.6425$

|           |          |
|-----------|----------|
| 162 → 172 | 0.18128  |
| 166 → 173 | -0.15492 |
| 167 → 172 | 0.24339  |
| 167 → 174 | -0.22719 |
| 167 → 177 | 0.14346  |
| 168 → 174 | 0.14104  |
| 169 → 173 | -0.16519 |
| 169 → 175 | -0.10397 |
| 169 → 176 | -0.23892 |
| 170 → 176 | -0.22873 |
| 171 → 177 | 0.26558  |
| 171 → 179 | -0.12871 |

Excited State 17: 5.9606 eV 208.01 nm  $f=0.0360$

|           |          |
|-----------|----------|
| 161 → 172 | -0.14908 |
| 162 → 173 | -0.24385 |
| 166 → 172 | 0.24364  |
| 167 → 173 | -0.12573 |
| 167 → 176 | -0.17043 |
| 168 → 178 | 0.11648  |
| 169 → 174 | -0.20718 |
| 169 → 177 | 0.20362  |

**Table S2.** continued.

|           |          |
|-----------|----------|
| 170 → 172 | -0.14263 |
| 170 → 174 | -0.10559 |
| 171 → 173 | 0.13587  |
| 171 → 178 | 0.28335  |
| 171 → 180 | 0.11321  |

Excited State 18: 6.0376 eV 205.35 nm  $f=0.0014$

|           |          |
|-----------|----------|
| 162 → 172 | 0.10412  |
| 166 → 173 | -0.16603 |
| 168 → 172 | 0.14153  |
| 168 → 174 | -0.19534 |
| 169 → 175 | -0.11097 |
| 169 → 178 | 0.11934  |
| 170 → 173 | 0.40876  |
| 171 → 172 | -0.35443 |
| 171 → 174 | -0.13144 |

Excited State 19: 6.0876 eV 203.67 nm  $f=0.0096$

|           |          |
|-----------|----------|
| 161 → 172 | 0.13922  |
| 165 → 172 | 0.20596  |
| 165 → 174 | -0.17738 |
| 166 → 172 | 0.11602  |
| 166 → 174 | -0.15715 |
| 167 → 175 | -0.11199 |
| 167 → 176 | 0.17148  |
| 168 → 175 | -0.21383 |
| 169 → 172 | 0.19310  |
| 169 → 174 | 0.13170  |
| 169 → 177 | -0.18170 |
| 170 → 177 | -0.16368 |

**Table S2.** continued.

|           |          |
|-----------|----------|
| 170 → 179 | -0.17845 |
| 171 → 173 | 0.13270  |
| 171 → 178 | 0.22575  |

Excited State 20: 6.0963 eV 203.38 nm  $f=0.0206$

|           |          |
|-----------|----------|
| 161 → 173 | 0.18454  |
| 162 → 172 | 0.21351  |
| 165 → 173 | -0.18612 |
| 167 → 172 | 0.14221  |
| 167 → 174 | 0.18968  |
| 167 → 177 | -0.21051 |
| 169 → 175 | -0.26742 |
| 169 → 176 | 0.27559  |
| 169 → 178 | 0.16998  |

**Table S3.** TD-DFT results for **10b** in chloroform.

Excitation energies and oscillator strengths:

Excited State 1: Singlet-A 3.3333 eV 371.96 nm  $f=4.7425$ 

136→142 -0.13627

138→141 0.35574

139→140 0.57690

Excited State 2: Singlet-A 3.6286 eV 341.69 nm  $f=0.1848$ 

136→141 0.13330

138→140 0.46108

139→141 0.48893

Excited State 3: Singlet-A 4.3650 eV 284.04 nm  $f=0.0590$ 

135→141 -0.16767

135→143 0.11944

137→140 0.51112

137→142 0.31476

139→145 -0.15503

139→146 -0.10777

Excited State 4: Singlet-A 4.4203 eV 280.49 nm  $f=0.1393$ 

135→140 -0.17526

136→140 -0.30675

**Table S3.** continued.

|         |          |
|---------|----------|
| 137→141 | 0.14346  |
| 137→143 | -0.13131 |
| 138→141 | -0.29414 |
| 138→145 | -0.10559 |
| 139→140 | 0.10402  |
| 139→142 | 0.40067  |
| 139→144 | 0.12385  |

Excited State 5: Singlet-A 4.7492 eV 261.06 nm  $f=0.0004$

|         |          |
|---------|----------|
| 133→141 | 0.13635  |
| 135→140 | 0.36359  |
| 135→142 | 0.16399  |
| 136→140 | -0.24615 |
| 137→141 | -0.27174 |
| 137→143 | 0.13815  |
| 138→141 | -0.14668 |
| 138→145 | 0.11808  |
| 139→142 | 0.11777  |
| 139→144 | -0.21239 |

Excited State 6: Singlet-A 4.8915 eV 253.47 nm  $f=0.0074$

|         |         |
|---------|---------|
| 133→140 | 0.17590 |
|---------|---------|

**Table S3.** continued.

|         |          |
|---------|----------|
| 134→140 | -0.20060 |
| 135→141 | 0.17338  |
| 136→141 | 0.28076  |
| 137→142 | 0.10332  |
| 137→144 | 0.10470  |
| 138→140 | 0.10542  |
| 138→142 | -0.20377 |
| 139→141 | -0.13503 |
| 139→143 | 0.30434  |
| 139→145 | 0.20884  |

Excited State 7: Singlet-A 4.9846 eV 248.73 nm  $f=0.0001$

|         |          |
|---------|----------|
| 131→140 | -0.36374 |
| 131→141 | 0.40155  |
| 131→142 | 0.26029  |
| 131→143 | 0.21710  |
| 131→144 | -0.13790 |
| 131→146 | 0.11627  |
| 131→147 | -0.12390 |
| 131→148 | 0.10825  |

Excited State 8: Singlet-A 4.9846 eV 248.73 nm  $f=0.0002$



**Table S3.** continued.

|         |          |
|---------|----------|
| 132→140 | 0.36368  |
| 132→141 | 0.40160  |
| 132→142 | -0.26029 |
| 132→143 | 0.21710  |
| 132→144 | 0.13791  |
| 132→146 | 0.11628  |
| 132→147 | 0.12390  |
| 132→148 | 0.10825  |

Excited State 9: Singlet-A 5.0646 eV 244.81 nm f=0.0372

|         |          |
|---------|----------|
| 133→140 | 0.12207  |
| 134→142 | -0.12549 |
| 136→141 | -0.25462 |
| 137→140 | 0.11762  |
| 138→140 | -0.34328 |
| 138→142 | -0.23167 |
| 139→141 | 0.35450  |
| 139→145 | 0.17775  |

Excited State 10: Singlet-A 5.2807 eV 234.79 nm f=0.0110

|         |         |
|---------|---------|
| 133→140 | 0.19645 |
| 133→142 | 0.11669 |

**Table S3.** continued.

|         |          |
|---------|----------|
| 134→140 | 0.17626  |
| 136→141 | -0.12859 |
| 136→143 | -0.13412 |
| 138→140 | 0.16494  |
| 138→142 | 0.31092  |
| 138→144 | -0.22795 |
| 139→141 | -0.11185 |
| 139→143 | -0.21524 |
| 139→145 | 0.20526  |
| 139→146 | -0.17475 |

Excited State 11: Singlet-A 5.3123 eV 233.39 nm  $f=0.3229$

|         |          |
|---------|----------|
| 134→141 | -0.22100 |
| 135→140 | 0.14364  |
| 136→140 | 0.32239  |
| 137→141 | -0.20914 |
| 138→143 | -0.13799 |
| 138→145 | -0.11489 |
| 139→142 | 0.39900  |
| 139→144 | 0.16563  |

Excited State 12: Singlet-A 5.4887 eV 225.89 nm  $f=0.1821$

**Table S3.** continued.

|         |          |
|---------|----------|
| 136→140 | -0.17203 |
| 136→142 | -0.12911 |
| 137→141 | -0.28581 |
| 137→143 | 0.13535  |
| 138→143 | 0.26247  |
| 138→145 | -0.18618 |
| 138→146 | 0.10240  |
| 139→142 | -0.14791 |
| 139→144 | 0.39784  |

Excited State 13: Singlet-A 5.6015 eV 221.34 nm f=0.0533

|         |          |
|---------|----------|
| 130→140 | -0.16355 |
| 133→143 | -0.12122 |
| 134→141 | -0.23685 |
| 135→140 | 0.22634  |
| 135→142 | 0.13140  |
| 136→142 | -0.17613 |
| 137→141 | 0.24969  |
| 137→143 | -0.22871 |
| 137→146 | 0.20854  |
| 138→143 | 0.23575  |
| 139→147 | 0.16342  |

**Table S3.** continued.Excited State 14: Singlet-A 5.6155 eV 220.79 nm  $f=0.1101$ 

130→141 -0.12021

133→140 -0.13205

134→140 -0.23633

135→141 -0.11899

136→141 0.17283

136→146 -0.15220

137→140 0.23653

138→144 -0.21095

139→143 -0.27518

139→145 0.29604

139→146 0.18356

Excited State 15: Singlet-A 5.7052 eV 217.32 nm  $f=0.0031$ 

133→140 0.23934

134→140 -0.21578

135→141 0.29443

137→142 0.21156

137→144 0.11987

139→141 0.10045

139→143 -0.26063

**Table S3.** continued.

139→145      -0.25990

139→146      0.10998

Excited State 16: Singlet-A    5.8699 eV    211.22 nm    f=0.0508

134→141      0.20315

135→140      0.12630

135→142      0.11125

136→140      -0.18019

136→142      -0.11095

137→143      -0.10035

137→145      0.12175

137→146      0.10200

138→141      0.41371

139→140      -0.30710

139→142      0.10134

139→144      0.11542

Excited State 17: Singlet-A    5.9217 eV    209.37 nm    f=0.1068

130→141      0.15889

134→140      0.24320

135→141      0.10402

136→141      -0.11191

**Table S3.** continued.

|         |          |
|---------|----------|
| 136→143 | 0.15383  |
| 136→146 | -0.12556 |
| 137→140 | 0.13603  |
| 137→142 | 0.10301  |
| 137→144 | 0.11048  |
| 138→140 | 0.16209  |
| 138→142 | -0.13483 |
| 139→141 | -0.15995 |
| 139→146 | 0.39524  |

Excited State 18: Singlet-A 5.9750 eV 207.51 nm  $f=0.1586$

|         |          |
|---------|----------|
| 130→140 | 0.18602  |
| 134→141 | 0.11052  |
| 135→140 | 0.22028  |
| 135→142 | 0.21113  |
| 135→144 | 0.10182  |
| 136→140 | 0.14178  |
| 136→142 | 0.25641  |
| 137→141 | 0.19699  |
| 137→145 | 0.13479  |
| 138→141 | -0.14955 |
| 138→145 | -0.20401 |

**Table S3.** continued.

|         |          |
|---------|----------|
| 139→140 | 0.15652  |
| 139→144 | 0.16609  |
| 139→147 | -0.19135 |

Excited State 19: Singlet-A 6.0813 eV 203.88 nm  $f=0.0557$

|         |          |
|---------|----------|
| 130→141 | 0.10540  |
| 133→140 | -0.23049 |
| 133→142 | -0.19672 |
| 135→145 | 0.24198  |
| 136→143 | -0.13213 |
| 137→140 | -0.21186 |
| 137→142 | 0.27246  |
| 137→144 | 0.30491  |
| 138→144 | -0.15073 |
| 138→147 | -0.10478 |

Excited State 20: Singlet-A 6.1238 eV 202.46 nm  $f=0.2043$

|         |          |
|---------|----------|
| 127→141 | 0.12851  |
| 130→140 | -0.20451 |
| 133→141 | -0.22150 |
| 134→141 | -0.10516 |
| 135→140 | -0.14453 |



**Table S3.** continued.

|         |          |
|---------|----------|
| 135→142 | 0.16808  |
| 135→144 | 0.25851  |
| 137→141 | -0.11049 |
| 137→143 | 0.12861  |
| 137→145 | 0.42303  |

**Table S4.** TD-DFT results for **21a** in chloroform.

Excitation energies and oscillator strengths:

Excited State 1: Singlet-A 3.4642 eV 357.90 nm  $f=2.8925$ 

125→128 0.11195

126→128 0.16253

126→129 -0.11183

127→128 0.64639

Excited State 2: Singlet-A 4.3907 eV 282.38 nm  $f=0.0353$ 

124→128 -0.18887

125→128 0.12178

125→130 0.13628

126→128 -0.37766

126→129 -0.21591

127→129 0.38332

127→131 -0.14798

Excited State 3: Singlet-A 4.4909 eV 276.08 nm  $f=0.0983$ 

123→128 -0.10149

124→128 -0.10400

125→128 0.43354

**Table S4.** continued.

|         |          |
|---------|----------|
| 125→129 | 0.32787  |
| 126→132 | 0.11301  |
| 127→129 | -0.28977 |
| 127→130 | -0.10938 |

Excited State 4: Singlet-A 4.8971 eV 253.18 nm f=0.1181

|         |          |
|---------|----------|
| 122→128 | 0.21401  |
| 124→128 | 0.29176  |
| 124→129 | 0.15434  |
| 125→129 | 0.14116  |
| 125→132 | 0.10686  |
| 126→129 | -0.25939 |
| 126→130 | 0.19616  |
| 127→130 | -0.13696 |
| 127→131 | 0.28287  |
| 127→132 | -0.13189 |

Excited State 5: Singlet-A 4.9886 eV 248.53 nm f=0.0002

|         |          |
|---------|----------|
| 121→128 | 0.54072  |
| 121→129 | -0.28354 |

**Table S4.** continued.

|         |          |
|---------|----------|
| 121→130 | -0.23934 |
| 121→133 | -0.12925 |
| 121→134 | 0.11620  |
| 121→135 | -0.10015 |

Excited State 6: Singlet-A 5.0563 eV 245.21 nm  $f=0.1959$

|         |          |
|---------|----------|
| 123→128 | 0.26692  |
| 124→129 | 0.18754  |
| 124→130 | -0.10399 |
| 125→129 | 0.20163  |
| 125→130 | -0.14327 |
| 125→131 | 0.12269  |
| 126→128 | -0.21979 |
| 126→129 | 0.14782  |
| 126→132 | 0.12973  |
| 126→133 | 0.11472  |
| 127→130 | 0.32122  |
| 127→132 | -0.12409 |

Excited State 7: Singlet-A 5.2676 eV 235.37 nm  $f=0.1835$

**Table S4.** continued.

|         |          |
|---------|----------|
| 123→128 | -0.16888 |
| 123→129 | 0.12252  |
| 124→128 | 0.14725  |
| 124→129 | 0.11522  |
| 126→128 | 0.34266  |
| 126→130 | 0.13567  |
| 126→133 | 0.10639  |
| 127→128 | -0.10742 |
| 127→129 | 0.37870  |
| 127→131 | -0.19326 |

Excited State 8: Singlet-A 5.4258 eV 228.51 nm f=0.1345

|         |         |
|---------|---------|
| 122→129 | 0.12539 |
| 125→128 | 0.20555 |
| 125→129 | 0.10356 |
| 125→130 | 0.16820 |
| 126→129 | 0.21904 |
| 126→130 | 0.10165 |
| 127→129 | 0.16009 |
| 127→130 | 0.26724 |

**Table S4.** continued.

127→131 0.34344

127→133 0.12932

Excited State 9: Singlet-A 5.5927 eV 221.69 nm f=0.1212

120→128 0.14475

122→130 -0.10300

123→128 0.26238

124→129 -0.15179

125→128 -0.24220

125→129 0.15712

125→130 -0.12545

125→132 -0.13617

126→128 0.13513

126→130 0.18720

126→133 -0.13675

127→130 -0.13439

127→131 -0.18461

127→133 0.24556

Excited State 10: Singlet-A 5.7583 eV 215.31 nm f=0.0774

**Table S4.** continued.

|         |          |
|---------|----------|
| 122→128 | 0.30818  |
| 122→129 | 0.15097  |
| 124→128 | 0.24645  |
| 124→130 | 0.12783  |
| 125→129 | 0.16182  |
| 126→128 | -0.10424 |
| 126→130 | -0.18511 |
| 126→132 | -0.15392 |
| 127→130 | 0.17942  |
| 127→131 | -0.25435 |
| 127→132 | 0.21819  |

Excited State 11: Singlet-A 5.8244 eV 212.87 nm f=0.6192

|         |          |
|---------|----------|
| 122→128 | 0.12791  |
| 123→128 | 0.14003  |
| 123→129 | 0.14214  |
| 124→128 | 0.10094  |
| 124→129 | 0.11041  |
| 124→131 | -0.14467 |
| 125→129 | -0.13813 |

**Table S4.** continued.

|         |          |
|---------|----------|
| 125→130 | 0.24385  |
| 125→132 | 0.16432  |
| 125→133 | -0.20671 |
| 126→129 | 0.20950  |
| 126→130 | -0.21078 |
| 127→130 | -0.22855 |
| 127→131 | -0.10485 |
| 127→132 | -0.13216 |
| 127→134 | 0.11051  |

Excited State 12: Singlet-A 6.0049 eV 206.47 nm  $f=0.1472$

|         |          |
|---------|----------|
| 120→128 | 0.23485  |
| 123→128 | 0.26345  |
| 124→128 | 0.10432  |
| 124→129 | 0.20436  |
| 124→132 | 0.14057  |
| 125→128 | 0.17826  |
| 126→131 | -0.13874 |
| 126→132 | -0.24921 |
| 126→134 | 0.10283  |



**Table S4.** continued.

127→132      0.26901

Excited State 13: Singlet-A   6.0800 eV   203.92 nm    $f=0.0080$

120→128      -0.18292

123→128      -0.19117

124→129      0.23777

124→131      -0.19356

125→130      -0.12164

125→131      0.22830

125→132      -0.12121

126→128      -0.14681

126→130      0.12168

126→131      -0.22313

126→133      -0.14780

127→133      0.21919

Excited State 14: Singlet-A   6.1644 eV   201.13 nm    $f=0.7027$

123→129      -0.14577

124→132      0.17823

124→133      0.13074

**Table S4.** continued.

|         |          |
|---------|----------|
| 125→128 | -0.19048 |
| 125→129 | 0.13014  |
| 125→130 | 0.18561  |
| 125→132 | 0.36566  |
| 126→132 | -0.23230 |
| 127→129 | -0.10663 |
| 127→130 | 0.13648  |
| 127→132 | -0.12417 |
| 127→133 | 0.17172  |
| 127→134 | -0.10658 |

Excited State 15: Singlet-A 6.2798 eV 197.43 nm f=0.2607

|         |          |
|---------|----------|
| 120→128 | -0.18577 |
| 123→129 | 0.26025  |
| 124→128 | -0.14273 |
| 125→128 | -0.15265 |
| 125→129 | 0.18490  |
| 125→130 | -0.14447 |
| 125→131 | 0.11164  |
| 125→133 | -0.16746 |

**Table S4.** continued.

|         |          |
|---------|----------|
| 126→128 | 0.13085  |
| 126→129 | -0.15893 |
| 126→130 | -0.12102 |
| 126→132 | -0.13951 |
| 127→131 | 0.13921  |
| 127→132 | 0.17658  |
| 127→134 | 0.14696  |

Excited State 16: Singlet-A 6.3425 eV 195.48 nm f=0.0539

|         |          |
|---------|----------|
| 122→128 | -0.20586 |
| 122→129 | -0.24875 |
| 123→130 | -0.10983 |
| 124→128 | 0.19048  |
| 124→129 | 0.13256  |
| 124→131 | 0.15626  |
| 125→129 | 0.10767  |
| 125→130 | 0.12586  |
| 125→131 | -0.19268 |
| 125→132 | -0.10850 |
| 125→133 | -0.13480 |

**Table S4.** continued.

|         |          |
|---------|----------|
| 126→131 | 0.12533  |
| 126→132 | -0.11537 |
| 127→133 | 0.26063  |

Excited State 17: Singlet-A 6.4975eV 190.82nm f=0.0485

|         |          |
|---------|----------|
| 120→131 | -0.10627 |
| 124→132 | 0.11632  |
| 125→129 | 0.18263  |
| 125→130 | -0.12270 |
| 125→131 | -0.21222 |
| 125→132 | 0.13089  |
| 125→133 | 0.18310  |
| 126→128 | -0.11030 |
| 126→129 | 0.33891  |
| 126→131 | -0.18234 |
| 127→128 | 0.13748  |
| 127→130 | -0.18636 |
| 127→133 | -0.11621 |

Excited State 18: Singlet-A 6.6286 eV 187.04 nm f=0.0015

**Table S4.** continued.

|         |          |
|---------|----------|
| 116→128 | 0.20713  |
| 119→128 | 0.39701  |
| 119→129 | -0.16480 |
| 119→130 | -0.11876 |
| 120→128 | 0.20644  |
| 123→128 | -0.18081 |
| 123→129 | -0.12372 |
| 125→133 | -0.11056 |
| 127→134 | 0.14371  |

Excited State 19: Singlet-A 6.6918 eV 185.28 nm f=0.0685

|         |          |
|---------|----------|
| 116→128 | -0.16273 |
| 118→128 | -0.13030 |
| 119→128 | 0.43928  |
| 119→129 | -0.19131 |
| 119→130 | -0.14387 |
| 120→128 | -0.16799 |
| 123→128 | 0.12866  |
| 123→129 | 0.14770  |
| 125→133 | 0.12261  |

**Table S4.** continued.

Excited State 20: Singlet-A 6.7482 eV 183.73 nm f=0.0036

116→128 0.12105

120→129 -0.11484

122→129 0.26123

124→128 -0.20034

124→129 0.26336

124→131 0.10466

125→129 -0.12780

125→130 -0.15755

125→132 0.12315

125→134 -0.14487

126→131 0.27246

126→132 -0.11454

126→133 -0.12608

127→133 0.10904

**Table S5.** TD-DFT results for **22** (isomer A) in chloroform.

Excitation energies and oscillator strengths:

Excited State 1: Singlet-A 4.4024 eV 281.63 nm  $f=1.3452$ 

112 →117 0.12192

115 →116 0.66773

Excited State 2: Singlet-A 4.6410 eV 267.15 nm  $f=0.0314$ 

113→117 -0.13420

114 →116 0.58331

115 →117 -0.21964

115 →118 -0.22345

Excited State 3: Singlet-A 5.1524 eV 240.63 nm  $f=0.0493$ 

112→116 0.27299

112→119 0.15416

113→117 -0.14184

113→120 -0.11538

115→117 0.47228

115→118 -0.22921

115→120 -0.10476

**Table S5.** continued.

Excited State 4: Singlet-A 5.1887 eV 238.95 nm  $f=0.1347$   $\langle S^{*2} \rangle = 0.000$

|         |          |
|---------|----------|
| 111→117 | 0.12867  |
| 112→118 | 0.20877  |
| 113→116 | 0.44781  |
| 114→117 | -0.23271 |
| 114→120 | -0.11803 |
| 115→116 | 0.11596  |
| 115→119 | -0.35314 |

Excited State 5: Singlet-A 5.8148 eV 213.22 nm  $f=0.0202$   $\langle S^{*2} \rangle = 0.000$

|         |          |
|---------|----------|
| 110→117 | -0.10237 |
| 111→116 | 0.32459  |
| 112→116 | 0.34470  |
| 112→119 | 0.16799  |
| 113→117 | 0.11052  |
| 113→118 | -0.20538 |
| 114→119 | -0.18049 |
| 115→117 | 0.11191  |
| 115→120 | 0.32537  |



**Table S5.** continued.

Excited State 6: Singlet-A 5.8436 eV 212.17 nm  $f=1.3427$

|         |          |
|---------|----------|
| 111→117 | 0.14007  |
| 113→119 | 0.10547  |
| 114→117 | 0.53907  |
| 114→118 | 0.30053  |
| 114→120 | -0.15552 |
| 115→119 | -0.14770 |

Excited State 7: Singlet-A 5.8495 eV 211.96 nm  $f=0.4722$

|         |          |
|---------|----------|
| 111→116 | 0.10680  |
| 112→116 | -0.11283 |
| 112→119 | -0.10750 |
| 113→118 | 0.10121  |
| 114→116 | 0.34267  |
| 114→119 | 0.14622  |
| 115→117 | 0.33976  |
| 115→118 | 0.40601  |
| 115→120 | -0.12868 |

Excited State 8: Singlet-A 6.0807 eV 203.90 nm  $f=0.4708$

**Table S5.** continued.

112→118 -0.14876

113→116 0.30527

113→119 0.21760

114→117 -0.10559

114→118 0.37398

115→119 0.38044

115→121 -0.11593

Excited State 9: Singlet-A 6.3174 eV 196.26 nm f=0.1394

111→116 0.36203

112→116 -0.30336

112→119 0.12616

113→117 0.21627

115→117 0.21463

115→118 -0.35875

Excited State 10: Singlet-A 6.3535 eV 195.14 nm f=0.0701

110→116 0.12177

111→117 0.10663

112→117 -0.13287

**Table S5.** continued.

|         |          |
|---------|----------|
| 112→120 | -0.10798 |
| 113→116 | 0.32315  |
| 113→119 | -0.26366 |
| 114→117 | 0.18066  |
| 114→118 | -0.29231 |
| 114→120 | -0.14512 |
| 115→119 | 0.30320  |
| 115→121 | 0.10826  |

Excited State 11: Singlet-A 6.5262 eV 189.98 nm f=0.0003

|         |          |
|---------|----------|
| 111→116 | 0.16932  |
| 112→116 | 0.37999  |
| 113→117 | 0.10913  |
| 113→118 | 0.24376  |
| 114→119 | 0.41948  |
| 115→120 | -0.14874 |

Excited State 12: Singlet-A 6.7425 eV 183.89 nm f=0.0955

|          |          |
|----------|----------|
| 111→116  | -0.14124 |
| 112 →116 | -0.11480 |

**Table S5.** continued.

112→121 -0.11424

113→117 -0.11033

113→118 0.14680

114→119 0.33240

115→117 0.13412

115→120 0.50714

Excited State 13: Singlet-A 6.7705 eV 183.12 nm f=0.0444

110→116 -0.24437

111→118 -0.20525

112→117 0.33272

113→116 0.18335

114→117 0.24913

114→118 -0.27158

114→120 0.14200

115→121 -0.20355

Excited State 14: Singlet-A 7.0452 eV 175.98 nm f=0.0290

111→116 0.27906

113→117 0.52163

**Table S5.** continued.

|         |          |
|---------|----------|
| 113→118 | 0.17899  |
| 113→120 | -0.14758 |
| 114→119 | -0.12843 |
| 114→121 | 0.12078  |

Excited State 15: Singlet-A 7.0802 eV 175.11 nm f=0.1226

|         |          |
|---------|----------|
| 111→117 | -0.12543 |
| 112→117 | 0.41864  |
| 112→118 | 0.13154  |
| 112→120 | -0.14208 |
| 113→119 | -0.15521 |
| 114→120 | -0.41365 |
| 115→121 | -0.12931 |

Excited State 16: Singlet-A 7.2074 eV 172.02 nm f=0.0151

|         |          |
|---------|----------|
| 108→116 | -0.19165 |
| 110→116 | 0.42877  |
| 111→117 | -0.25161 |
| 113→121 | 0.14859  |
| 114→120 | 0.13695  |

**Table S5.** continued.

115→119 -0.11297

115→121 -0.30091

Excited State17: Singlet-A 7.3653 eV 168.34 nm f=0.1189

110→118 0.16069

111→119 0.42509

113→117 0.18594

113→118 -0.24637

113→120 -0.26292

114→119 0.22800

114→121 -0.15663

Excited State18: Singlet-A 7.4126 eV 167.26 nm f=0.0315

110→119 0.10248

111→118 0.23107

111→120 0.14034

112→117 0.22621

112→118 0.22606

112→120 -0.17424

113→119 -0.14987

**Table S5.** continued.

114→118 0.12459

114→120 0.43393

115→121 0.14854

Excited State 19: Singlet-A 7.4365 eV 166.72 nm f=0.0861

110→116 0.24281

110→119 0.11904

111→117 0.34145

111→118 -0.16497

112→118 0.28770

113→116 -0.10841

113→119 0.25631

113→121 -0.13100

114→118 -0.18156

115→119 0.16416

Excited State 20: Singlet-A 7.4651 eV 166.09 nm f=0.0098

110→118 0.18945

111→116 0.21303

111→119 -0.14453

**Table S5.** continued.

|         |          |
|---------|----------|
| 112→119 | 0.23583  |
| 113→118 | 0.31095  |
| 113→120 | -0.21648 |
| 114→119 | -0.19999 |
| 114→121 | -0.27629 |
| 115→118 | 0.14850  |
| 115→120 | 0.14251  |



**Table S6.** TD-DFT results for **22** (isomer B) in chloroform.

Excitation energies and oscillator strengths:

Excited State 1: Singlet-A 4.4024 eV 281.63 nm f=1.3422

112→117 -0.12202

115→116 0.66772

Excited State 2: Singlet-A 4.6409 eV 267.15 nm f=0.0315

113→117 0.13420

114→116 0.58339

115→117 -0.21941

115→118 -0.22349

Excited State 3: Singlet-A 5.1525 eV 240.63 nm f=0.0509

111→116 -0.19794

112→116 -0.27309

112→119 -0.15412

113→117 0.14187

113→120 0.11536

115→117 0.47236

115→118 -0.22891

115→120 -0.10483

**Table S6.** continued.

Excited State 4: Singlet-A 5.1888 eV 238.95 nm f=0.1343

111→117 -0.12868

112→118 0.20866

113→116 0.44796

114→117 0.23280

114→120 0.11800

115→116 -0.11605

115→119 0.35292

Excited State 5: Singlet-A 5.8148 eV 213.22 nm f=0.0227

110→117 0.10238

111→116 -0.32446

112→116 0.34507

112→119 -0.16756

113→117 0.11055

113→118 -0.20566

114→119 0.18083

115→117 -0.11077

115→120 -0.32571

**Table S6.** continued.

Excited State 6: Singlet-A 5.8435 eV 212.18 nm  $f=1.3410$

111→117 0.14014

113→119 -0.10542

114→117 0.53894

114→118 0.30074

114→120 -0.15552

115→119 -0.14760

Excited State 7: Singlet-A 5.8496 eV 211.95 nm  $f=0.4734$

111→116 0.10808

112→116 0.11166

112→119 0.10803

113→118 -0.10051

114→116 0.34258

114→119 0.14565

115→117 0.34009

115→118 0.40632

115→120 -0.12752

Excited State 8: Singlet-A 6.0810 eV 203.89 nm  $f=0.4698$

**Table S6.** continued.

|         |          |
|---------|----------|
| 112→118 | 0.14874  |
| 113→116 | -0.30490 |
| 113→119 | -0.21780 |
| 114→117 | -0.10575 |
| 114→118 | 0.37410  |
| 115→119 | 0.38033  |
| 115→121 | -0.11611 |

Excited State 9: Singlet-A 6.3177 eV 196.25 nm  $f=0.1406$

|         |          |
|---------|----------|
| 111→116 | 0.36164  |
| 112→116 | 0.30382  |
| 112→119 | -0.12626 |
| 113→117 | -0.21599 |
| 115→117 | 0.21478  |
| 115→118 | -0.35880 |

Excited State 10: Singlet-A 6.3539 eV 195.13 nm  $f=0.0693$

|           |          |
|-----------|----------|
| 110→116   | -0.12152 |
| 111→117 - | 0.10650  |
| 112→117   | -0.13263 |

**Table S6.** continued.

|         |          |
|---------|----------|
| 112→120 | -0.10799 |
| 113→116 | 0.32344  |
| 113→119 | -0.26354 |
| 114→117 | -0.18069 |
| 114→118 | 0.29211  |
| 114→120 | 0.14498  |
| 115→119 | -0.30348 |
| 115→121 | -0.10807 |

Excited State 11: Singlet-A 6.5263 eV 189.98 nm f=0.0023

|         |          |
|---------|----------|
| 111→116 | 0.16959  |
| 112→116 | -0.37959 |
| 113→117 | -0.10919 |
| 113→118 | -0.24391 |
| 114→119 | 0.41945  |
| 115→120 | -0.14891 |

Excited State 12: Singlet-A 6.7426eV 183.88nm f=0.0999

|         |          |
|---------|----------|
| 111→116 | -0.14136 |
| 112→116 | 0.11467  |

**Table S6.** continued.

|         |          |
|---------|----------|
| 112→121 | 0.11429  |
| 113→117 | 0.11037  |
| 113→118 | -0.14686 |
| 114→119 | 0.33235  |
| 115→117 | 0.13412  |
| 115→120 | 0.50714  |

Excited State 13 :Singlet-A 6.7705 eV 183.12 nm f=0.0405

|         |          |
|---------|----------|
| 110→116 | 0.24437  |
| 111→118 | 0.20527  |
| 112→117 | 0.33267  |
| 113→116 | 0.18322  |
| 114→117 | -0.24925 |
| 114→118 | 0.27135  |
| 114→120 | -0.14215 |
| 115→121 | 0.20349  |

Excited State 14: Singlet-A 7.0451 eV 175.99 nm f=0.0294

|         |         |
|---------|---------|
| 111→116 | 0.27906 |
| 113→117 | 0.52162 |

**Table S6.** continued.

|         |          |
|---------|----------|
| 113→118 | 0.17909  |
| 113→120 | -0.14753 |
| 114→119 | 0.12841  |
| 114→121 | -0.12100 |

Excited State 15: Singlet-A 7.0801 eV 175.12nm f=0.1206

|         |          |
|---------|----------|
| 111→117 | 0.12558  |
| 112→117 | 0.41862  |
| 112→118 | 0.13156  |
| 112→120 | -0.14203 |
| 113→119 | -0.15520 |
| 114→120 | 0.41357  |
| 115→121 | 0.12965  |

Excited State 16: Singlet-A 7.2074 eV 172.02nm f=0.0146

|         |          |
|---------|----------|
| 108→116 | -0.19211 |
| 110→116 | 0.42848  |
| 111→117 | -0.25144 |
| 113→121 | -0.14870 |
| 114→120 | 0.13735  |

**Table S6.** continued.

115→119 -0.11305

115→121 -0.30092

Excited State 17: Singlet-A 7.3655 eV 168.33n mf=0.1209

110→118 0.16047

111→119 0.42499

113→117 -0.18592

113→118 0.24599

113→120 0.26309

114→119 0.22801

114→121 -0.15704

ExcitedState18: Singlet-A 7.4127 eV 167.26 nm f=0.0309

110→119 0.10287

111→118 0.23022

111→120 0.13996

112→117 -0.22641

112→118 -0.22756

112→120 0.17449

113→119 0.14864



**Table S6.** continued.

114→118 0.12365

114→120 0.43396

115→121 0.14846

Excited State 19: Singlet-A 7.4367 eV 166.72 nm  $f=0.0844$

110→116 0.24228

110→119 0.11843

111→117 0.34266

111→118 -0.16589

112→118 -0.28686

113→116 0.10882

113→119 -0.25725

113→121 0.13167

114→118 -0.18244

115→119 0.16427

Excited State 20: Singlet-A 7.4652 eV 166.08 nm  $f=0.0100$

110→118 -0.18904

111→116 -0.21296

111→119 0.14468

**Table S6.** continued.

|         |          |
|---------|----------|
| 112→119 | 0.23517  |
| 113→118 | 0.31115  |
| 113→120 | -0.21660 |
| 114→119 | 0.20020  |
| 114→121 | 0.27657  |
| 115→118 | -0.14826 |
| 115→120 | -0.14248 |

**Table S7.** Cartesian coordinates of isomer A of **9a** by TD-DFT calculations

|   |          |          |          |
|---|----------|----------|----------|
| C | 1.37895  | -2.23886 | -0.50485 |
| C | 2.77803  | -1.86050 | -0.53161 |
| C | 0.69103  | -1.02703 | -0.60193 |
| C | 0.69104  | -3.45785 | -0.40724 |
| C | -0.69113 | -3.45782 | -0.40725 |
| C | -0.69105 | -1.02701 | -0.60195 |
| C | -1.37901 | -2.23882 | -0.50489 |
| H | 1.24100  | -4.38790 | -0.33165 |
| H | -1.24113 | -4.38786 | -0.33168 |
| C | -2.77807 | -1.86042 | -0.53168 |
| C | 2.79048  | -0.46691 | -0.64282 |
| C | 3.99339  | -2.53956 | -0.48813 |
| C | 5.16803  | -1.80772 | -0.53717 |
| C | 3.94774  | 0.28113  | -0.70416 |
| C | 5.16735  | -0.40065 | -0.62769 |
| H | 4.02396  | -3.62092 | -0.42738 |
| H | 6.11065  | -2.33791 | -0.53856 |
| O | 1.52132  | 0.04732  | -0.68651 |
| H | 3.90975  | 1.35998  | -0.79438 |
| C | 6.39885  | 0.40222  | -0.68487 |
| C | -3.99345 | -2.53944 | -0.48821 |
| C | -2.79047 | -0.46682 | -0.64288 |
| C | -3.94772 | 0.28126  | -0.70425 |
| C | -5.16807 | -1.80756 | -0.53728 |
| C | -5.16734 | -0.40049 | -0.62782 |
| O | -1.52130 | 0.04737  | -0.68655 |
| H | -3.90969 | 1.36010  | -0.79447 |
| H | -4.02405 | -3.62080 | -0.42745 |
| H | -6.11072 | -2.33771 | -0.53866 |

**Table S7.** continued.

|   |          |          |          |
|---|----------|----------|----------|
| C | -6.39884 | 0.40238  | -0.68502 |
| C | 7.56254  | 0.22778  | -0.02449 |
| C | 7.82752  | -0.88615 | 0.95570  |
| C | -7.56251 | 0.22789  | -0.02463 |
| C | -7.82740 | -0.88607 | 0.95554  |
| H | 8.32156  | -0.47085 | 1.84102  |
| H | 6.87965  | -1.30044 | 1.30685  |
| C | 8.69709  | -2.01497 | 0.38532  |
| H | -6.87949 | -1.30031 | 1.30665  |
| H | -8.32145 | -0.47082 | 1.84089  |
| C | -8.69691 | -2.01494 | 0.38517  |
| H | 8.25340  | -2.38607 | -0.54630 |
| H | 9.68155  | -1.62219 | 0.10877  |
| C | 8.86532  | -3.17286 | 1.36515  |
| C | 9.73850  | -4.29405 | 0.80971  |
| H | 9.29896  | -2.79472 | 2.29835  |
| H | 7.87638  | -3.56934 | 1.62459  |
| H | -9.68136 | -1.62220 | 0.10853  |
| H | -8.25314 | -2.38607 | -0.54641 |
| C | -8.86518 | -3.17279 | 1.36504  |
| H | -7.87624 | -3.56921 | 1.62460  |
| H | -9.29892 | -2.79462 | 2.29818  |
| C | -9.73825 | -4.29404 | 0.80958  |
| C | 8.61564  | 1.21264  | -0.26685 |
| H | 6.32163  | 1.28525  | -1.31611 |
| C | 9.82038  | 1.26086  | 0.32770  |
| H | 8.38320  | 1.98050  | -1.00267 |
| H | 10.10685 | 0.51961  | 1.06825  |
| C | 10.79044 | 2.28844  | 0.02077  |
| C | 12.00057 | 2.38150  | 0.58803  |

**Table S7.** continued.

|   |           |          |          |
|---|-----------|----------|----------|
| H | 10.51571  | 3.03529  | -0.72140 |
| H | 12.34121  | 1.67354  | 1.33517  |
| C | 12.92358  | 3.46590  | 0.21208  |
| O | 14.07164  | 3.37908  | 0.89946  |
| O | 12.70402  | 4.33235  | -0.60288 |
| C | 15.04738  | 4.38448  | 0.61723  |
| H | 15.34315  | 4.34760  | -0.43243 |
| H | 14.65272  | 5.37612  | 0.84417  |
| H | 15.89610  | 4.15862  | 1.25812  |
| C | -8.61566  | 1.21270  | -0.26695 |
| H | -6.32164  | 1.28539  | -1.31629 |
| C | -9.82037  | 1.26089  | 0.32766  |
| H | -8.38331  | 1.98056  | -1.00281 |
| H | -10.10676 | 0.51965  | 1.06826  |
| C | -10.79050 | 2.28842  | 0.02075  |
| C | -12.00060 | 2.38144  | 0.58808  |
| H | -10.51585 | 3.03524  | -0.72147 |
| H | -12.34116 | 1.67349  | 1.33527  |
| C | -12.92368 | 3.46577  | 0.21214  |
| O | -14.07170 | 3.37893  | 0.89959  |
| O | -12.70422 | 4.33221  | -0.60286 |
| C | -15.04750 | 4.38426  | 0.61737  |
| H | -14.65289 | 5.37593  | 0.84426  |
| H | -15.34334 | 4.34732  | -0.43227 |
| H | -15.89618 | 4.15838  | 1.25832  |
| H | -10.74167 | -3.92779 | 0.57230  |
| H | -9.30925  | -4.70532 | -0.10931 |
| H | -9.84102  | -5.11220 | 1.52669  |
| H | 9.30960   | -4.70530 | -0.10924 |
| H | 10.74192  | -3.92774 | 0.57255  |

**Table S7.** continued.

|   |         |          |         |
|---|---------|----------|---------|
| H | 9.84123 | -5.11224 | 1.52679 |
|---|---------|----------|---------|

**Table S8.** Cartesian coordinates of isomer B of **9a** by TD-DFT calculations

|   |          |          |          |
|---|----------|----------|----------|
| C | -1.37351 | -2.18606 | -0.12129 |
| C | -2.76723 | -1.80709 | -0.24318 |
| C | -0.68835 | -0.97021 | -0.06116 |
| C | -0.68838 | -3.40899 | -0.06078 |
| C | 0.68839  | -3.40898 | 0.06080  |
| C | 0.68835  | -0.97021 | 0.06123  |
| C | 1.37352  | -2.18605 | 0.12134  |
| H | -1.23620 | -4.34211 | -0.10921 |
| H | 1.23622  | -4.34210 | 0.10921  |
| C | 2.76723  | -1.80708 | 0.24323  |
| C | -2.77995 | -0.40909 | -0.24567 |
| C | -3.97635 | -2.48783 | -0.36399 |
| C | -5.14707 | -1.75502 | -0.46424 |
| C | -3.93239 | 0.34083  | -0.35462 |
| C | -5.14894 | -0.34501 | -0.44505 |
| H | -4.00427 | -3.57065 | -0.39037 |
| H | -6.08073 | -2.28475 | -0.59488 |
| O | -1.51574 | 0.10730  | -0.13445 |
| H | -3.89457 | 1.42342  | -0.35777 |
| C | -6.37410 | 0.46137  | -0.55710 |
| C | 3.97636  | -2.48781 | 0.36401  |
| C | 2.77995  | -0.40907 | 0.24573  |
| C | 3.93238  | 0.34085  | 0.35468  |
| C | 5.14707  | -1.75500 | 0.46425  |
| C | 5.14893  | -0.34499 | 0.44508  |
| O | 1.51573  | 0.10731  | 0.13453  |
| H | 3.89456  | 1.42344  | 0.35784  |
| H | 4.00428  | -3.57063 | 0.39037  |
| H | 6.08073  | -2.28472 | 0.59487  |

**Table S8.** continued.

|   |           |          |          |
|---|-----------|----------|----------|
| C | 6.37410   | 0.46139  | 0.55712  |
| C | -7.60039  | 0.23204  | -0.04266 |
| C | -7.96210  | -0.96362 | 0.80071  |
| C | 7.60039   | 0.23205  | 0.04267  |
| C | 7.96208   | -0.96363 | -0.80068 |
| H | -7.05555  | -1.40704 | 1.21900  |
| H | -8.55613  | -0.62790 | 1.65783  |
| C | -8.75127  | -2.03768 | 0.03967  |
| H | 7.05553   | -1.40706 | -1.21894 |
| H | 8.55609   | -0.62793 | -1.65782 |
| C | 8.75127   | -2.03766 | -0.03962 |
| H | -9.69900  | -1.61955 | -0.31649 |
| H | -8.19926  | -2.33041 | -0.86147 |
| C | -9.02564  | -3.27329 | 0.89228  |
| C | -9.81735  | -4.34215 | 0.14482  |
| H | -8.07158  | -3.69213 | 1.23410  |
| H | -9.57044  | -2.97372 | 1.79524  |
| H | 9.69900   | -1.61953 | 0.31650  |
| H | 8.19927   | -2.33037 | 0.86154  |
| C | 9.02561   | -3.27330 | -0.89220 |
| H | 8.07154   | -3.69216 | -1.23398 |
| H | 9.57039   | -2.97376 | -1.79518 |
| C | 9.81735   | -4.34214 | -0.14473 |
| C | -8.62873  | 1.23618  | -0.31078 |
| H | -6.23714  | 1.39690  | -1.09580 |
| C | -9.89436  | 1.22939  | 0.14268  |
| H | -8.32210  | 2.06860  | -0.94175 |
| H | -10.25672 | 0.42301  | 0.77395  |
| C | -10.83388 | 2.27969  | -0.18173 |
| C | -12.10402 | 2.31821  | 0.24271  |



**Table S8.** continued.

|   |           |          |          |
|---|-----------|----------|----------|
| H | -10.48252 | 3.09194  | -0.81484 |
| H | -12.52232 | 1.54397  | 0.87597  |
| C | -12.98953 | 3.43039  | -0.14214 |
| O | -14.21107 | 3.27784  | 0.38952  |
| O | -12.68509 | 4.36885  | -0.84197 |
| C | -15.15880 | 4.30260  | 0.08252  |
| H | -14.80688 | 5.27052  | 0.44284  |
| H | -15.32588 | 4.35979  | -0.99424 |
| H | -16.07531 | 4.01820  | 0.59362  |
| C | 8.62873   | 1.23619  | 0.31075  |
| H | 6.23715   | 1.39693  | 1.09580  |
| C | 9.89435   | 1.22940  | -0.14271 |
| H | 8.32211   | 2.06863  | 0.94171  |
| H | 10.25671  | 0.42299  | -0.77396 |
| C | 10.83388  | 2.27969  | 0.18167  |
| C | 12.10402  | 2.31820  | -0.24279 |
| H | 10.48253  | 3.09196  | 0.81475  |
| H | 12.52232  | 1.54394  | -0.87604 |
| C | 12.98954  | 3.43039  | 0.14203  |
| O | 14.21108  | 3.27781  | -0.38963 |
| O | 12.68512  | 4.36885  | 0.84184  |
| C | 15.15882  | 4.30256  | -0.08266 |
| H | 14.80692  | 5.27048  | -0.44301 |
| H | 15.32588  | 4.35978  | 0.99411  |
| H | 16.07533  | 4.01813  | -0.59373 |
| H | 10.78801  | -3.95502 | 0.17968  |
| H | 9.27835   | -4.67598 | 0.74721  |
| H | 9.99877   | -5.21722 | -0.77363 |
| H | -10.78801 | -3.95505 | -0.17963 |
| H | -9.27834  | -4.67603 | -0.74710 |

**Table S8.** continued.

|   |          |          |         |
|---|----------|----------|---------|
| H | -9.99879 | -5.21721 | 0.77375 |
|---|----------|----------|---------|

**Table S9.** Cartesian coordinates of **10b** by TD-DFT calculations

|   |          |          |          |
|---|----------|----------|----------|
| C | -1.37924 | 2.24994  | -0.01693 |
| C | -2.77722 | 1.87019  | -0.03343 |
| C | -0.69100 | 1.03418  | -0.00811 |
| C | -0.69083 | 3.47318  | -0.00858 |
| C | 0.69084  | 3.47318  | 0.00861  |
| C | 0.69101  | 1.03418  | 0.00815  |
| C | 1.37925  | 2.24994  | 0.01697  |
| H | -1.24055 | 4.40642  | -0.01527 |
| H | 1.24055  | 4.40642  | 0.01530  |
| C | 2.77722  | 1.87019  | 0.03349  |
| C | -2.78946 | 0.47355  | -0.03215 |
| C | -3.99507 | 2.55187  | -0.05094 |
| C | -5.16732 | 1.82057  | -0.06392 |
| C | -3.94807 | -0.27718 | -0.04481 |
| C | -5.16599 | 0.40895  | -0.05844 |
| H | -4.02381 | 3.63493  | -0.05627 |
| H | -6.10999 | 2.35317  | -0.08259 |
| O | -1.52127 | -0.04307 | -0.01705 |
| H | -3.91001 | -1.35970 | -0.04210 |
| C | -6.40002 | -0.38160 | -0.06668 |
| C | 3.99507  | 2.55186  | 0.05105  |
| C | 2.78946  | 0.47355  | 0.03224  |

Table S9. continued.

|   |           |          |          |
|---|-----------|----------|----------|
| C | 3.94807   | -0.27718 | 0.04495  |
| C | 5.16732   | 1.82056  | 0.06408  |
| C | 5.16599   | 0.40895  | 0.05861  |
| O | 1.52127   | -0.04307 | 0.01712  |
| H | 3.91001   | -1.35971 | 0.04225  |
| H | 4.02381   | 3.63493  | 0.05639  |
| H | 6.10999   | 2.35316  | 0.08281  |
| C | 6.40002   | -0.38160 | 0.06689  |
| C | -7.65989  | 0.08010  | -0.02581 |
| H | -7.86036  | 1.14729  | 0.02114  |
| C | 7.65988   | 0.08009  | 0.02575  |
| H | 7.86034   | 1.14727  | -0.02152 |
| C | -8.81340  | -0.79206 | -0.03719 |
| H | -6.25631  | -1.45969 | -0.10604 |
| C | -10.08601 | -0.35796 | 0.00336  |
| H | -8.62320  | -1.86317 | -0.08128 |
| H | -10.28948 | 0.70981  | 0.04716  |
| C | -11.21858 | -1.25504 | -0.00825 |
| C | -12.49895 | -0.86208 | 0.03053  |
| H | -11.01421 | -2.32284 | -0.05123 |
| H | -12.77863 | 0.18445  | 0.07401  |
| C | -13.58746 | -1.85468 | 0.01572  |

Table S9. continued.

|   |           |          |          |
|---|-----------|----------|----------|
| O | -14.78522 | -1.25404 | 0.06003  |
| O | -13.44963 | -3.05547 | -0.02969 |
| C | -15.92126 | -2.12129 | 0.05215  |
| H | -15.93573 | -2.72614 | -0.85586 |
| H | -15.90671 | -2.77969 | 0.92217  |
| H | -16.78977 | -1.46815 | 0.08618  |
| C | 8.81340   | -0.79205 | 0.03723  |
| H | 6.25632   | -1.45969 | 0.10653  |
| C | 10.08600  | -0.35796 | -0.00356 |
| H | 8.62321   | -1.86315 | 0.08160  |
| H | 10.28946  | 0.70979  | -0.04765 |
| C | 11.21858  | -1.25503 | 0.00817  |
| C | 12.49894  | -0.86208 | -0.03080 |
| H | 11.01421  | -2.32282 | 0.05144  |
| H | 12.77862  | 0.18444  | -0.07456 |
| C | 13.58746  | -1.85467 | -0.01582 |
| O | 14.78521  | -1.25405 | -0.06037 |
| O | 13.44963  | -3.05545 | 0.02990  |
| C | 15.92125  | -2.12129 | -0.05237 |
| H | 15.93581  | -2.72590 | 0.85580  |
| H | 15.90662  | -2.77993 | -0.92221 |
| H | 16.78976  | -1.46816 | -0.08666 |

**Table S10.** Cartesian coordinates of **21a** by TD-DFT calculations

|   |           |          |          |
|---|-----------|----------|----------|
| C | 2.36078   | -1.04842 | -0.26418 |
| C | 0.98511   | -1.05457 | -0.13140 |
| O | 0.11546   | -0.05819 | -0.45188 |
| C | -1.12658  | -0.54278 | -0.13918 |
| C | -2.30953  | 0.14874  | -0.30710 |
| C | -3.49538  | -0.49313 | 0.06248  |
| C | -4.75412  | 0.23586  | -0.11507 |
| C | -5.99273  | -0.19846 | 0.16675  |
| C | -7.17179  | 0.60927  | -0.05360 |
| C | -8.42611  | 0.20208  | 0.21222  |
| C | -9.58325  | 1.03451  | -0.02325 |
| C | -10.84753 | 0.66626  | 0.22450  |
| C | -11.96327 | 1.58765  | -0.05139 |
| O | -13.13917 | 1.02600  | 0.26393  |
| C | -14.29794 | 1.83087  | 0.03559  |
| C | 0.34739   | -2.18521 | 0.38542  |
| O | 3.14443   | -0.04542 | -0.74374 |
| C | 4.42941   | -0.51853 | -0.67305 |
| C | 5.55340   | 0.18373  | -1.06752 |
| C | 6.78598   | -0.44984 | -0.93261 |
| C | 8.05631   | 0.27815  | -1.29264 |
| C | -3.44141  | -1.80307 | 0.58539  |

**Table S10.** continued.

|   |           |          |          |
|---|-----------|----------|----------|
| C | -2.24525  | -2.47650 | 0.74517  |
| C | -1.05947  | -1.83876 | 0.37745  |
| C | 1.08110   | -3.31634 | 0.77382  |
| C | 2.45713   | -3.30969 | 0.64131  |
| C | 3.09410   | -2.17283 | 0.12117  |
| C | 4.47288   | -1.81430 | -0.15317 |
| C | 5.70983   | -2.44293 | -0.02042 |
| C | 6.84652   | -1.75369 | -0.41047 |
| H | 3.04149   | -4.17287 | 0.93583  |
| H | 0.57130   | -4.18439 | 1.17357  |
| H | 5.47294   | 1.18757  | -1.46784 |
| H | 5.78189   | -3.44936 | 0.37522  |
| H | -2.31422  | 1.15342  | -0.71229 |
| H | -2.23137  | -3.48198 | 1.14859  |
| H | 7.81657   | -2.23044 | -0.31553 |
| H | -4.35886  | -2.30194 | 0.87193  |
| H | -4.65067  | 1.23918  | -0.52389 |
| H | -6.15505  | -1.19191 | 0.57644  |
| H | -7.01779  | 1.60659  | -0.46225 |
| H | -8.59479  | -0.79207 | 0.62036  |
| H | -9.41258  | 2.02866  | -0.43100 |
| H | -11.09382 | -0.30852 | 0.63007  |

**Table S10.** continued.

|   |           |          |          |
|---|-----------|----------|----------|
| O | -11.86317 | 2.70582  | -0.50170 |
| H | -14.38322 | 2.08850  | -1.02127 |
| H | -14.25056 | 2.74739  | 0.62582  |
| H | -15.14399 | 1.22302  | 0.34670  |
| H | 8.78433   | -0.43295 | -1.69721 |
| H | 7.85193   | 1.00727  | -2.08338 |
| C | 8.67334   | 0.99984  | -0.08819 |
| H | 7.93975   | 1.70577  | 0.31928  |
| H | 8.87183   | 0.26873  | 0.70467  |
| C | 9.96086   | 1.74125  | -0.43612 |
| H | 10.68822  | 1.03072  | -0.84926 |
| H | 9.75629   | 2.46921  | -1.23154 |
| C | 10.58057  | 2.46049  | 0.75911  |
| H | 9.85196   | 3.16912  | 1.17347  |
| H | 10.78571  | 1.73201  | 1.55418  |
| C | 11.86827  | 3.20636  | 0.41601  |
| H | 12.59468  | 2.49754  | 0.00113  |
| H | 11.66151  | 3.93400  | -0.37770 |
| C | 12.47987  | 3.92067  | 1.61802  |
| H | 11.78293  | 4.65573  | 2.03247  |
| H | 12.72340  | 3.20954  | 2.41347  |
| H | 13.39874  | 4.44671  | 1.34664  |



**Table S11.** Cartesian coordinates of isomer A of **22** by TD-DFT calculations

|   |          |          |          |
|---|----------|----------|----------|
| O | 1.47736  | -0.21115 | -0.36646 |
| C | 0.67066  | 0.86664  | -0.16667 |
| C | -0.67066 | 0.86664  | 0.16669  |
| O | -1.47737 | -0.21115 | 0.36648  |
| C | -1.33924 | 2.08181  | 0.33275  |
| C | 1.33924  | 2.08181  | -0.33274 |
| C | 2.71038  | 0.30505  | -0.67131 |
| C | 3.83545  | -0.44807 | -0.95289 |
| C | 2.69864  | 1.70185  | -0.66906 |
| C | 5.01049  | 0.23853  | -1.24808 |
| C | 6.28690  | -0.52038 | -1.50968 |
| C | 5.01491  | 1.64414  | -1.24980 |
| C | 0.67116  | 3.30367  | -0.16671 |
| C | -2.71038 | 0.30505  | 0.67132  |
| C | -3.83545 | -0.44807 | 0.95290  |
| C | -2.69864 | 1.70186  | 0.66907  |
| C | -5.01050 | 0.23853  | 1.24808  |
| C | -6.28691 | -0.52038 | 1.50968  |
| C | -5.01492 | 1.64414  | 1.24980  |
| C | -7.11584 | -0.71895 | 0.23474  |
| C | 3.87777  | 2.38313  | -0.96558 |
| C | -0.67117 | 3.30367  | 0.16673  |

**Table S11.** continued.

|   |           |          |          |
|---|-----------|----------|----------|
| C | -3.87777  | 2.38314  | 0.96558  |
| C | -8.41439  | -1.48096 | 0.48282  |
| C | -9.24302  | -1.68215 | -0.78320 |
| C | -10.54410 | -2.44420 | -0.54097 |
| C | -11.36458 | -2.63926 | -1.81295 |
| C | 7.11584   | -0.71895 | -0.23475 |
| C | 8.41439   | -1.48096 | -0.48284 |
| C | 9.24303   | -1.68215 | 0.78318  |
| C | 10.54411  | -2.44420 | 0.54094  |
| C | 11.36460  | -2.63925 | 1.81292  |
| H | 3.79897   | -1.53118 | -0.94490 |
| H | 3.90496   | 3.46655  | -0.97721 |
| H | 1.20481   | 4.23707  | -0.29904 |
| H | 7.34164   | 0.26127  | 0.20204  |
| H | 8.18245   | -2.45881 | -0.92392 |
| H | 6.05239   | -1.49823 | -1.94271 |
| H | 5.94004   | 2.16036  | -1.48462 |
| H | -1.20481  | 4.23707  | 0.29905  |
| H | -3.79898  | -1.53117 | 0.94491  |
| H | 6.88874   | 0.01800  | -2.24945 |
| H | 9.01428   | -0.94229 | -1.22755 |
| H | 6.50937   | -1.25445 | 0.50548  |

**Table S11.** continued.

|   |           |          |          |
|---|-----------|----------|----------|
| H | 9.47394   | -0.70403 | 1.22458  |
| H | -3.90497  | 3.46655  | 0.97721  |
| H | 8.64238   | -2.22013 | 1.52788  |
| H | 10.31187  | -3.42091 | 0.10015  |
| H | 10.79779  | -3.20112 | 2.56176  |
| H | -6.88875  | 0.01801  | 2.24944  |
| H | -5.94004  | 2.16036  | 1.48462  |
| H | -7.34164  | 0.26127  | -0.20204 |
| H | 11.14270  | -1.90592 | -0.20350 |
| H | 11.63462  | -1.67561 | 2.25592  |
| H | -6.05239  | -1.49822 | 1.94271  |
| H | -6.50936  | -1.25445 | -0.50548 |
| H | 12.28937  | -3.18659 | 1.61312  |
| H | -9.01428  | -0.94229 | 1.22753  |
| H | -9.47393  | -0.70404 | -1.22461 |
| H | -8.18245  | -2.45881 | 0.92391  |
| H | -8.64237  | -2.22014 | -1.52789 |
| H | -11.14270 | -1.90593 | 0.20346  |
| H | -10.31187 | -3.42091 | -0.10017 |
| H | -11.63459 | -1.67562 | -2.25596 |
| H | -10.79777 | -3.20114 | -2.56178 |
| H | -12.28935 | -3.18660 | -1.61316 |

**Table S12.** Cartesian coordinates of isomer B of **22** by TD-DFT calculations

|   |          |          |          |
|---|----------|----------|----------|
| O | -1.52213 | -0.44880 | -0.89668 |
| C | -0.69109 | -1.29264 | -0.22615 |
| C | 0.69109  | -1.29264 | -0.22615 |
| O | 1.52213  | -0.44880 | -0.89668 |
| C | 1.38008  | -2.24402 | 0.52974  |
| C | -1.38008 | -2.24402 | 0.52974  |
| C | -2.79231 | -0.85240 | -0.57497 |
| C | -3.95192 | -0.26482 | -1.04637 |
| C | -2.78051 | -1.94604 | 0.29397  |
| C | -5.16357 | -0.80485 | -0.62267 |
| C | -6.46536 | -0.17929 | -1.05587 |
| C | -5.16843 | -1.90485 | 0.25235  |
| C | -0.69154 | -3.20052 | 1.28990  |
| C | 2.79231  | -0.85240 | -0.57496 |
| C | 3.95192  | -0.26482 | -1.04637 |
| C | 2.78051  | -1.94604 | 0.29398  |
| C | 5.16357  | -0.80485 | -0.62267 |
| C | 6.46536  | -0.17929 | -1.05586 |
| C | 5.16843  | -1.90485 | 0.25236  |
| C | 6.96561  | 0.87229  | -0.05790 |
| C | -3.99648 | -2.48170 | 0.71468  |
| C | 0.69154  | -3.20052 | 1.28990  |

Table S12. continued.

|   |           |          |          |
|---|-----------|----------|----------|
| C | 3.99648   | -2.48171 | 0.71468  |
| C | 8.28480   | 1.51190  | -0.48107 |
| C | 8.78707   | 2.56157  | 0.50679  |
| C | 10.10706  | 3.20506  | 0.08757  |
| C | 10.59968  | 4.25327  | 1.08145  |
| C | -6.96561  | 0.87229  | -0.05790 |
| C | -8.28480  | 1.51190  | -0.48108 |
| C | -8.78707  | 2.56157  | 0.50678  |
| C | -10.10706 | 3.20506  | 0.08756  |
| C | -10.59968 | 4.25327  | 1.08144  |
| H | -3.91424  | 0.58198  | -1.72166 |
| H | -4.02630  | -3.33246 | 1.38557  |
| H | -1.24102  | -3.93121 | 1.87085  |
| H | -7.08204  | 0.40478  | 0.92721  |
| H | -8.16343  | 1.97283  | -1.46969 |
| H | -6.34114  | 0.28738  | -2.03847 |
| H | -6.12295  | -2.31232 | 0.56915  |
| H | 1.24102   | -3.93121 | 1.87085  |
| H | 3.91424   | 0.58198  | -1.72166 |
| H | -7.22684  | -0.95818 | -1.16889 |
| H | -9.04592  | 0.72981  | -0.59795 |
| H | -6.19943  | 1.64832  | 0.05726  |

**Table S12.** continued.

|   |           |          |          |
|---|-----------|----------|----------|
| H | -8.90765  | 2.10066  | 1.49565  |
| H | 4.02630   | -3.33246 | 1.38557  |
| H | -8.02518  | 3.34297  | 0.62391  |
| H | -9.98510  | 3.66433  | -0.90056 |
| H | -9.86945  | 5.06088  | 1.19223  |
| H | 6.34114   | 0.28738  | -2.03846 |
| H | 6.12295   | -2.31232 | 0.56915  |
| H | 6.19943   | 1.64832  | 0.05727  |
| H | -10.86705 | 2.42335  | -0.02894 |
| H | -10.75758 | 3.81126  | 2.07010  |
| H | 7.22684   | -0.95818 | -1.16889 |
| H | 7.08204   | 0.40478  | 0.92722  |
| H | -11.54450 | 4.69827  | 0.75902  |
| H | 8.16343   | 1.97283  | -1.46969 |
| H | 8.02518   | 3.34297  | 0.62392  |
| H | 9.04592   | 0.72981  | -0.59794 |
| H | 8.90765   | 2.10066  | 1.49566  |
| H | 9.98510   | 3.66434  | -0.90055 |
| H | 10.86705  | 2.42335  | -0.02893 |
| H | 9.86945   | 5.06088  | 1.19224  |
| H | 10.75758  | 3.81126  | 2.07011  |
| H | 11.54450  | 4.69827  | 0.75902  |
